# Supplementary material for: A China dataset of soil properties for land surface modeling (version 2)
Source: Copernicus journal article supplement (doi:10.5194/essd-2024-299), 2024-08-29
Supplement: Supplementary file 1 [file essd-2024-299-supplement.pdf]

*Supplementary materials of*

**A China dataset of soil properties for land surface modeling (version 2)**

**Gaosong Shi et al.**

*Correspondence to:* Wei Shangguan (Email: [shgwei@mail.sysu.edu.cn](mailto:shgwei@mail.sysu.edu.cn))

## List of supplementary materials

1. Figure S1. The frequency distributions of soil properties at 0-5 cm depth Interval.
2. Figure S2. The predicted maps of bulk density (BD) content at multiple depths. (a) 0-5 cm; (b) 5-15 cm; (c) 15-30 cm; (d) 30-60 cm; (e) 60-100 cm and (f) 100-200 cm depth interval.
- 10 3. Figure S3. The predicted maps of sand content at multiple depths. (a) 0-5 cm; (b) 5-15 cm; (c) 15-30 cm; (d) 30-60 cm; (e) 60-100 cm and (f) 100-200 cm depth interval.
4. Figure S4. The predicted maps of silt content at multiple depths. (a) 0-5 cm; (b) 5-15 cm; (c) 15-30 cm; (d) 30-60 cm; (e) 60-100 cm and (f) 100-200 cm depth interval.
5. Figure S5. The predicted maps of clay content at multiple depths. (a) 0-5 cm; (b) 5-15 cm; (c) 15-30 cm; (d) 30-60 cm; (e) 60-100 cm and (f) 100-200 cm depth interval.
- 15 6. Figure S6. The predicted maps of Rock fragment (gravel) content at multiple depths. (a) 0-5 cm; (b) 5-15 cm; (c) 15-30 cm; (d) 30-60 cm; (e) 60-100 cm and (f) 100-200 cm depth interval.
7. Figure S7. The predicted maps of porosity content at multiple depths. (a) 0-5 cm; (b) 5-15 cm; (c) 15-30 cm; (d) 30-60 cm; (e) 60-100 cm and (f) 100-200 cm depth interval.
- 20 8. Figure S8. The predicted maps of R (Wet) content at multiple depths. (a) 0-5 cm; (b) 5-15 cm; (c) 15-30 cm; (d) 30-60 cm; (e) 60-100 cm and (f) 100-200 cm depth interval.
9. Figure S9. The predicted maps of G (Wet) content at multiple depths. (a) 0-5 cm; (b) 5-15 cm; (c) 15-30 cm; (d) 30-60 cm; (e) 60-100 cm and (f) 100-200 cm depth interval.
10. Figure S10. The predicted maps of B (Wet) content at multiple depths. (a) 0-5 cm; (b) 5-15 cm; (c) 15-30 cm; (d) 30-60 25 cm; (e) 60-100 cm and (f) 100-200 cm depth interval.
11. Figure S11. The predicted maps of R (Dry) content at multiple depths. (a) 0-5 cm; (b) 5-15 cm; (c) 15-30 cm; (d) 30-60 cm; (e) 60-100 cm and (f) 100-200 cm depth interval.
12. Figure S12. The predicted maps of G (Dry) content at multiple depths. (a) 0-5 cm; (b) 5-15 cm; (c) 15-30 cm; (d) 30-60 cm; (e) 60-100 cm and (f) 100-200 cm depth interval.
- 30 13. Figure S13. The predicted maps of B (Dry) content at multiple depths. (a) 0-5 cm; (b) 5-15 cm; (c) 15-30 cm; (d) 30-60 cm; (e) 60-100 cm and (f) 100-200 cm depth interval.
14. Figure S14. The predicted maps of Wet colours at multiple depths. Colour bar shows some representative colours. (a) 0-5 cm; (b) 5-15 cm; (c) 15-30 cm; (d) 30-60 cm; (e) 60-100 cm and (f) 100-200 cm depth interval.
15. Figure S15. The predicted maps of Dry colours at multiple depths. Colour bar shows some representative colours. (a) 0-5 35 cm; (b) 5-15 cm; (c) 15-30 cm; (d) 30-60 cm; (e) 60-100 cm and (f) 100-200 cm depth interval.

16. Figure S16. The predicted maps of soil pH at multiple depths. (a) 0-5 cm; (b) 5-15 cm; (c) 15-30 cm; (d) 30-60 cm; (e) 60-100 cm and (f) 100-200 cm depth interval.
17. Figure S17. The predicted maps of soil organic carbon (OC) content at multiple depths. (a) 0-5 cm; (b) 5-15 cm; (c) 15-30 cm; (d) 30-60 cm; (e) 60-100 cm and (f) 100-200 cm depth interval.
- 40 18. Figure S18. The predicted maps of Cation Exchange Capacity (CEC) content at multiple depths. (a) 0-5 cm; (b) 5-15 cm; (c) 15-30 cm; (d) 30-60 cm; (e) 60-100 cm and (f) 100-200 cm depth interval.
19. Figure S19. The predicted maps of Total N (TN) content at multiple depths. (a) 0-5 cm; (b) 5-15 cm; (c) 15-30 cm; (d) 30-60 cm; (e) 60-100 cm and (f) 100-200 cm depth interval.
20. Figure S20. The predicted maps of Total P (TP) content at multiple depths. (a) 0-5 cm; (b) 5-15 cm; (c) 15-30 cm; (d) 30-45 60 cm; (e) 60-100 cm and (f) 100-200 cm depth interval.
21. Figure S21. The predicted maps of Total K (TK) content at multiple depths. (a) 0-5 cm; (b) 5-15 cm; (c) 15-30 cm; (d) 30-60 cm; (e) 60-100 cm and (f) 100-200 cm depth interval.
22. Figure S22. The predicted maps of Alkali-hydrolysable N (AN) content at multiple depths. (a) 0-5 cm; (b) 5-15 cm; (c) 15-30 cm; (d) 30-60 cm; (e) 60-100 cm and (f) 100-200 cm depth interval.
- 50 23. Figure S23. The predicted maps of Available K (AK) content at multiple depths. (a) 0-5 cm; (b) 5-15 cm; (c) 15-30 cm; (d) 30-60 cm; (e) 60-100 cm and (f) 100-200 cm depth interval.
24. Figure S24. The predicted maps of Available P (AP) content at multiple depths. (a) 0-5 cm; (b) 5-15 cm; (c) 15-30 cm; (d) 30-60 cm; (e) 60-100 cm and (f) 100-200 cm depth interval.
25. Figure S25. The maps of uncertainty of the soil pH and organic carbon (OC) predictions at 0-5 cm (a, c) and 60-100 cm 55 (b, d) depth interval.
26. Figure S26. Relative importance of predictors for the Quantile Regression Forest model in the spatial predictions of alkali-hydrolysable nitrogen (AN), rock fragment (gravel), porosity, total potassium (TK), available potassium (AK), available phosphorus (AP), wet color (R, G, B), and dry color (R, G, B) at the surface layer (0-5 cm). See Table S6 for abbreviations of the environmental covariates.
- 60 27. Table S1. List of environmental covariates used to characterize soil-forming environments.
28. Table S2. Tuned model parameters for each soil property considered at 0-5 cm depth interval. See Table 1 for abbreviations and units of the soil properties considered.
29. Table S3. Statistical description of soil properties at six depth intervals. Refer to Table 1 for the abbreviations and units of the soil properties interested.
- 65 30. Table S4. Predictive performance of CSDLv2, CSDLv1, SoilGrids 2.0, and HWSD 2.0. Twenty repeats of validation with testing soil profiles for CSDLv2, and validation using all soil profiles for other datasets. See Table 1 for the abbreviations and

units of the soil properties interested.

31. Table S5. Predictive performance of CSDLv2, SoilGrids 2.0, CSDLv2, and HWSD 2.0 based on validation with testing profiles from WoSIS. Refer to Table 1 for the abbreviations and units of the soil properties interested.

70 32. Table S6. Prediction interval coverage probability (PICP) for each soil property at multiple depths. Refer to Table 1 for the abbreviations and units of the soil properties interested.

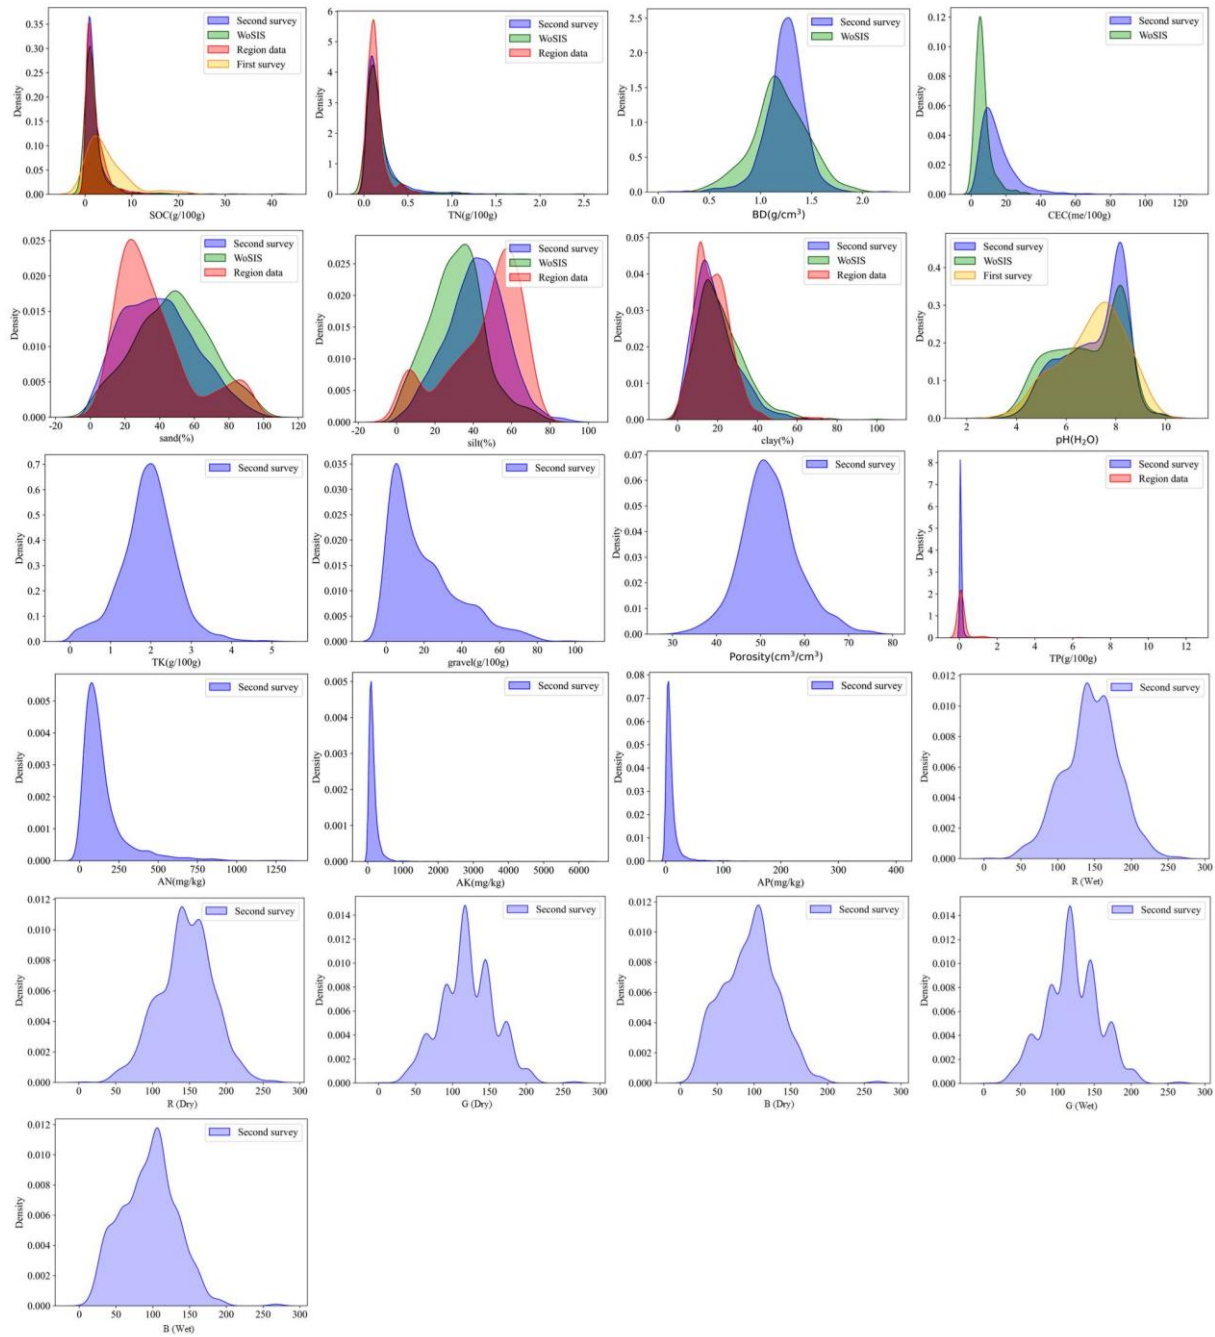

**Figure S1. The frequency distributions of soil properties at 0-5 cm depth Interval.**

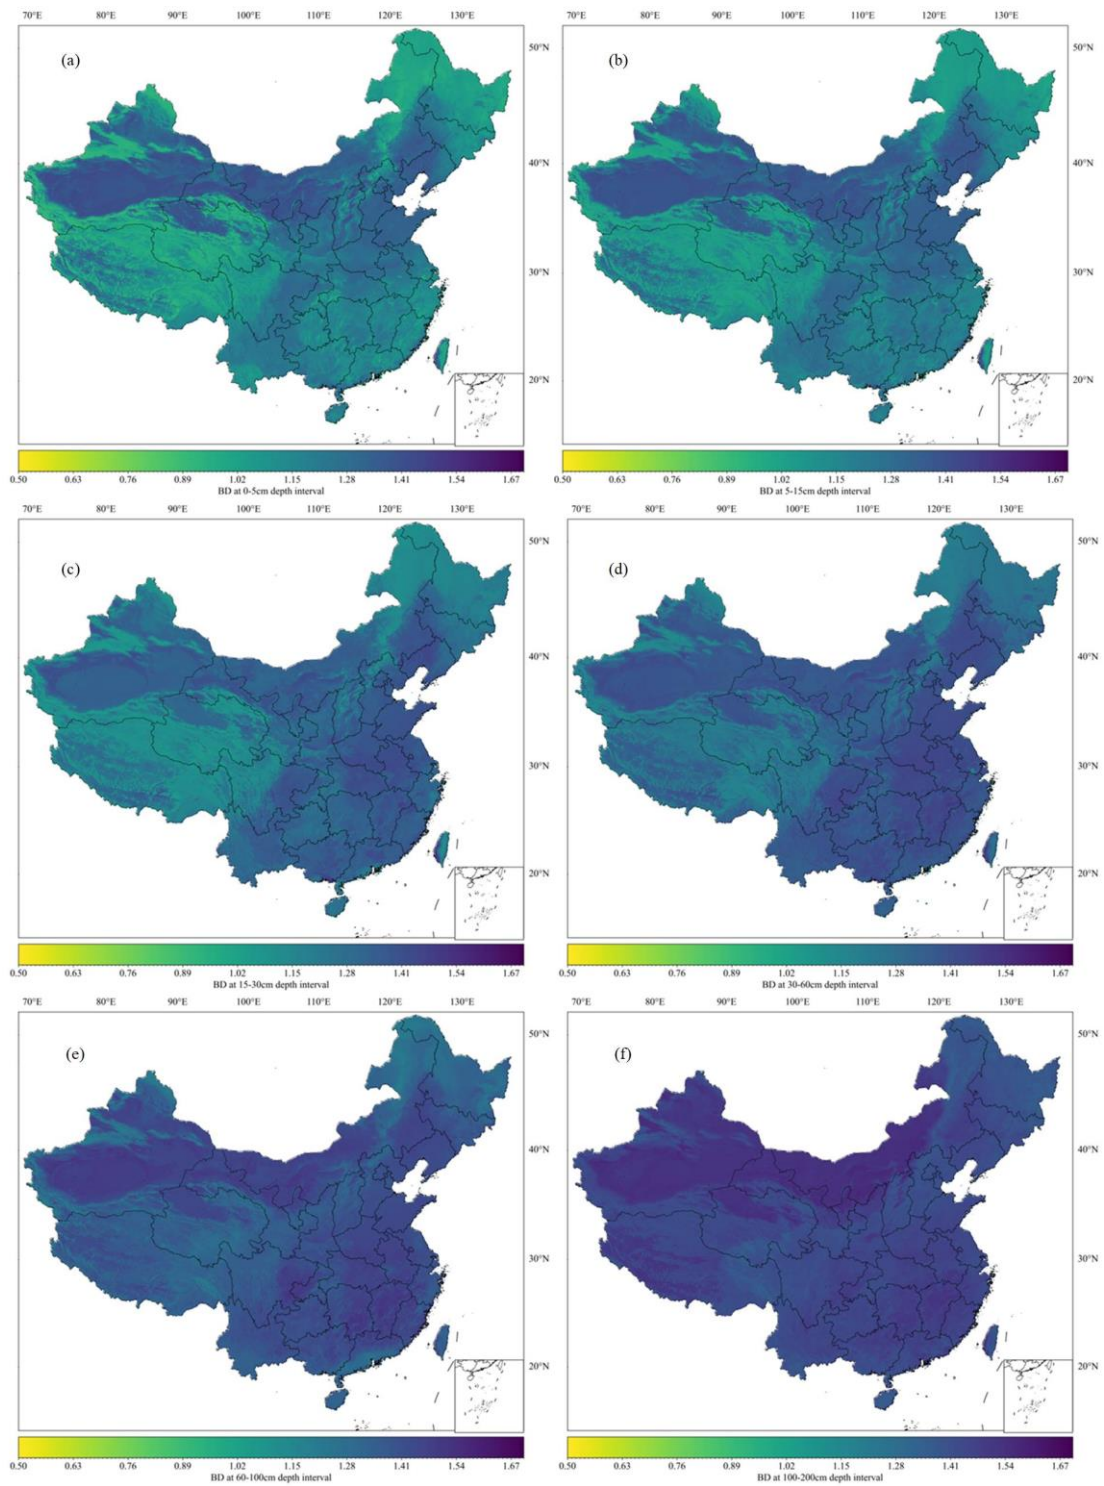

75

**Figure S2.** The predicted maps of bulk density (BD) content at multiple depths. (a) 0-5 cm; (b) 5-15 cm; (c) 15-30 cm; (d) 30-60 cm; (e) 60-100 cm and (f) 100-200 cm depth interval.

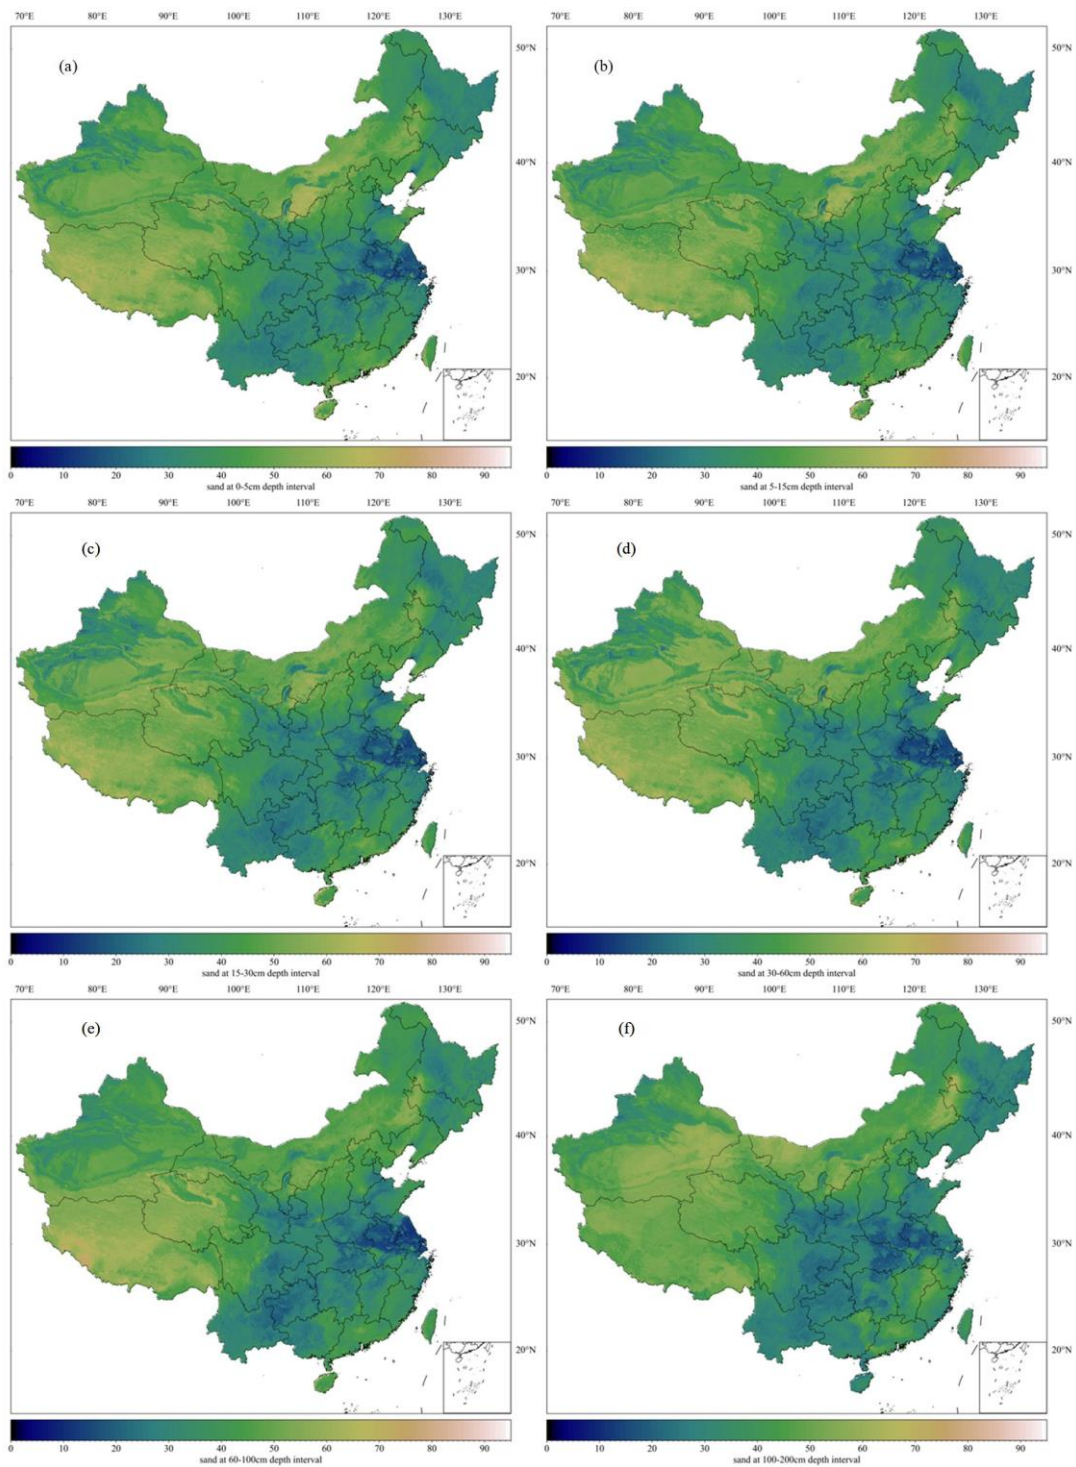

80 **Figure S3. The predicted maps of sand content at multiple depths. (a) 0-5 cm; (b) 5-15 cm; (c) 15-30 cm; (d) 30-60 cm; (e) 60-100 cm and (f) 100-200 cm depth interval.**

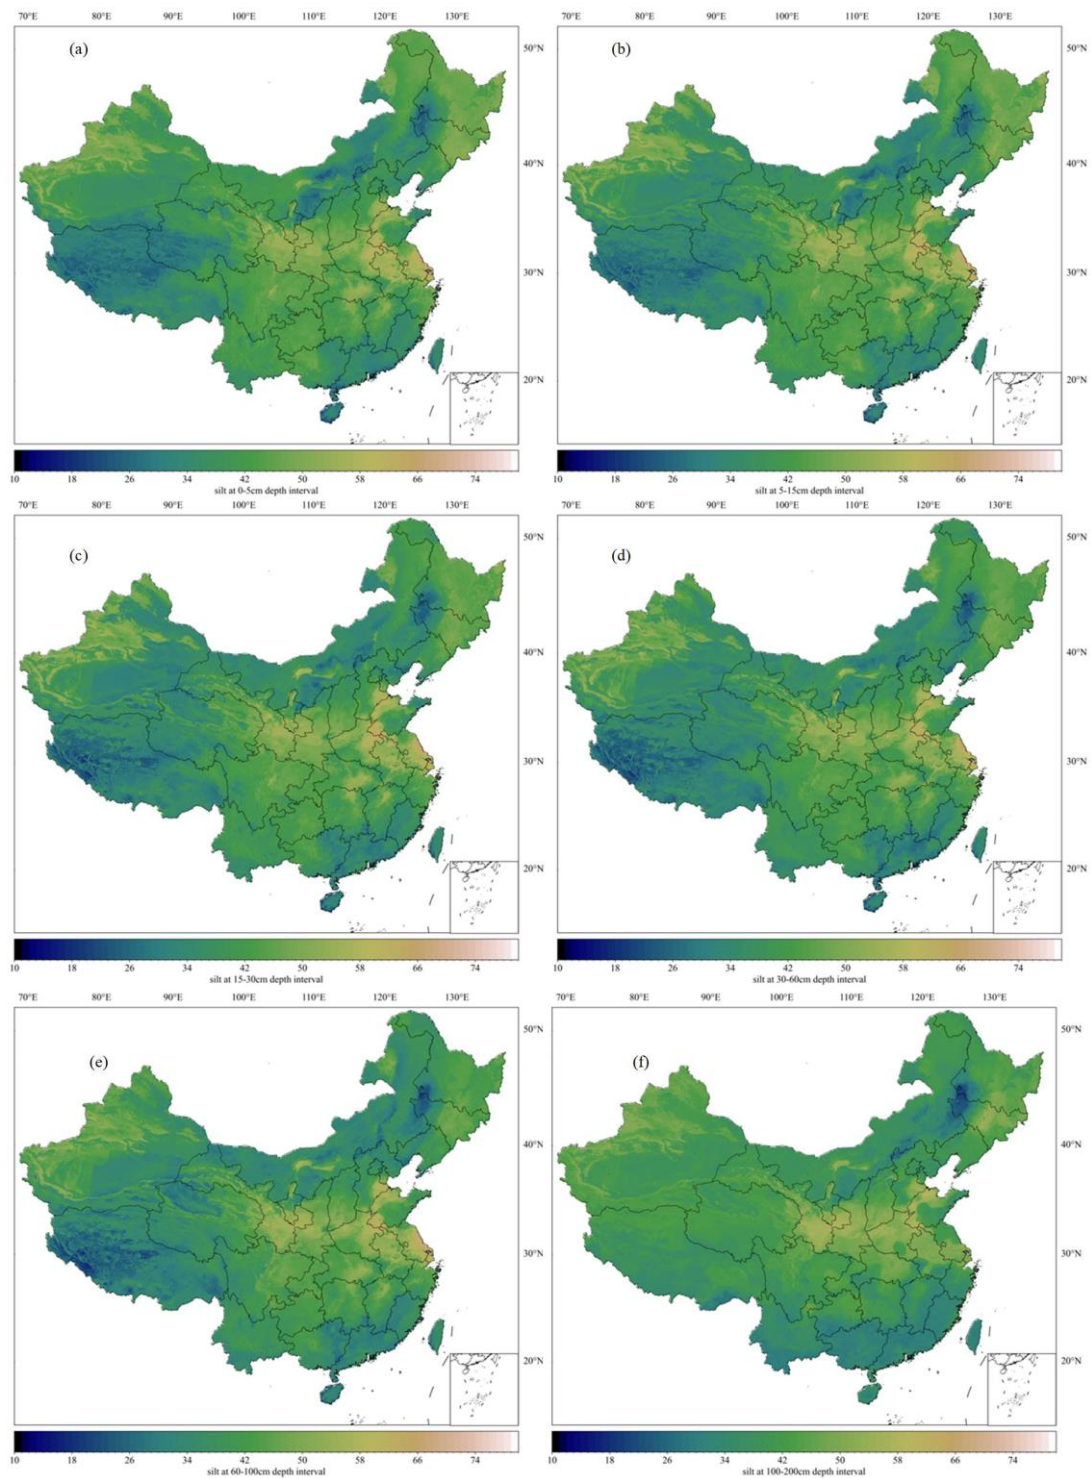

**Figure S4.** The predicted maps of silt content at multiple depths. (a) 0-5 cm; (b) 5-15 cm; (c) 15-30 cm; (d) 30-60 cm; (e) 60-100 cm and (f) 100-200 cm depth interval.



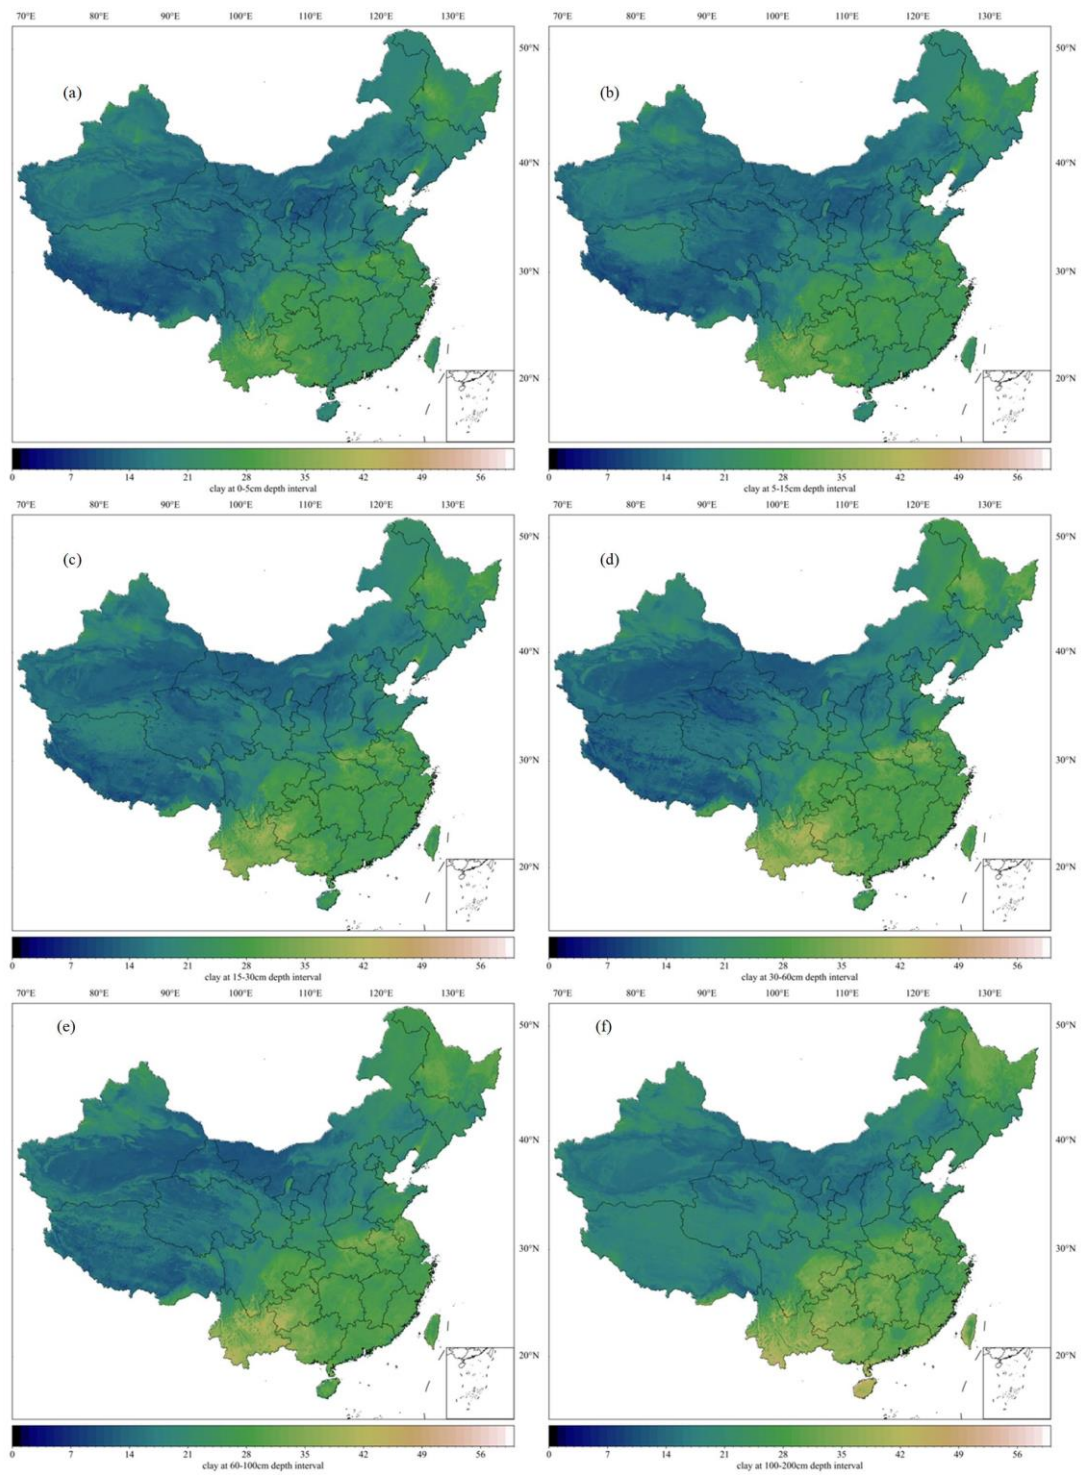

85 **Figure S5.** The predicted maps of clay content at multiple depths. (a) 0-5 cm; (b) 5-15 cm; (c) 15-30 cm; (d) 30-60 cm; (e) 60-100 cm and (f) 100-200 cm depth interval.

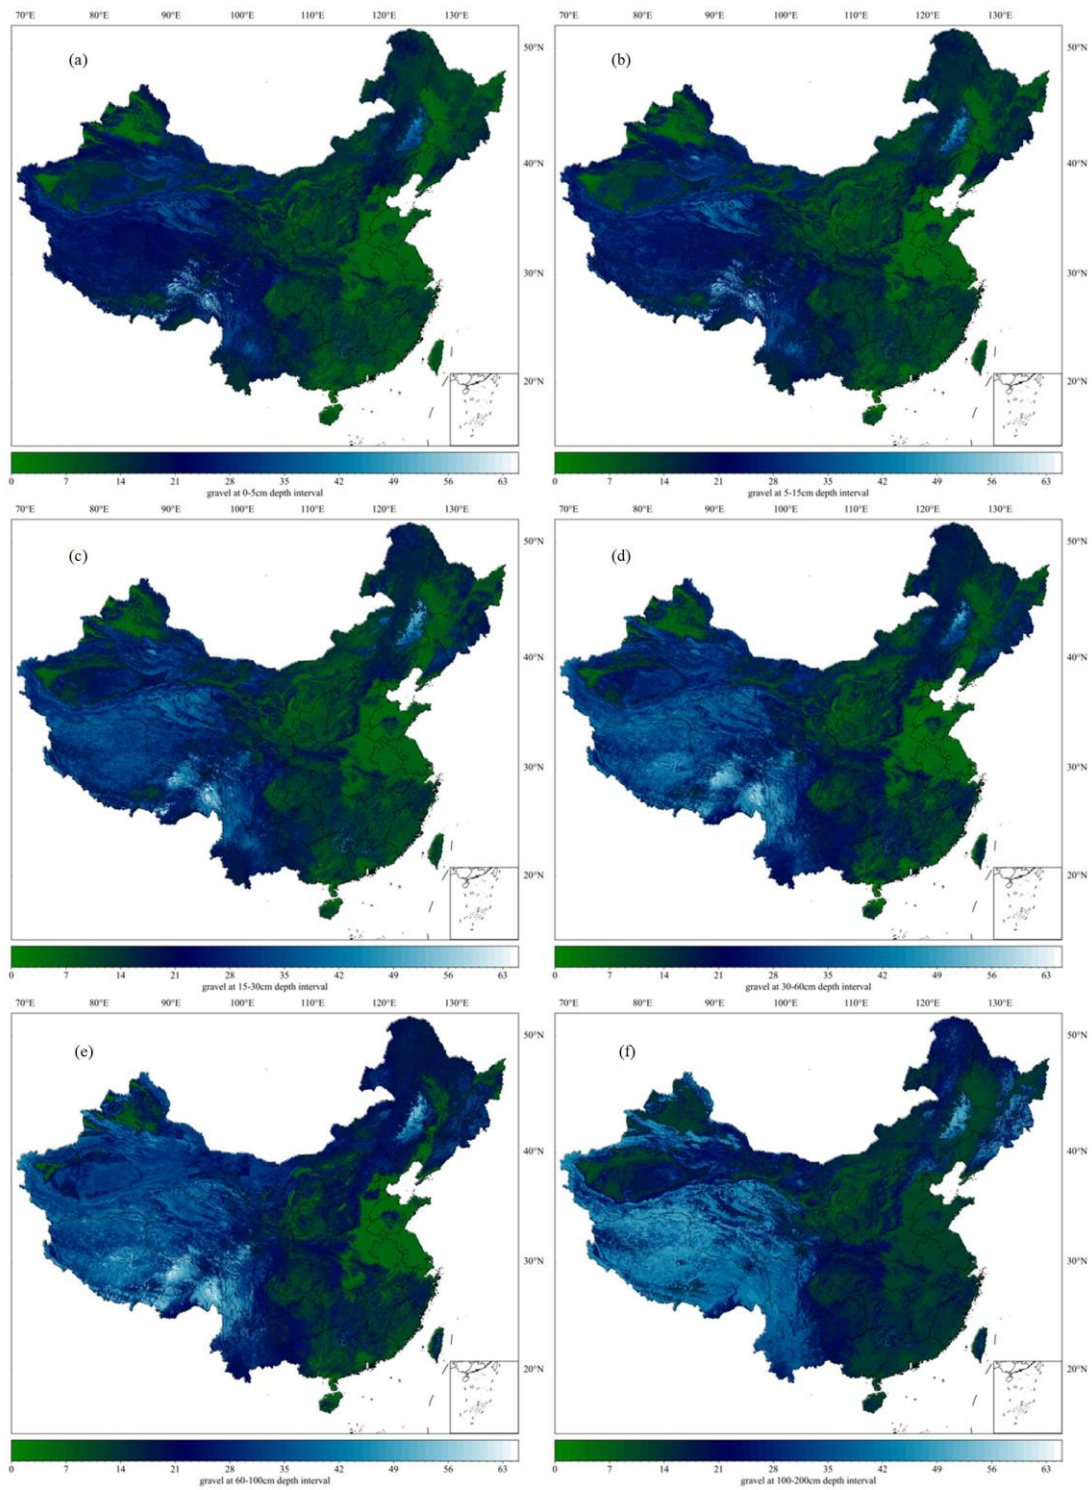

**Figure S6.** The predicted maps of Rock depth fragment (gravel) content at multiple depths. (a) 0-5 cm; (b) 5-15 cm; (c) 15-30 cm; (d) 30-60 cm; (e) 60-100 cm and (f) 100-200 cm depth interval.

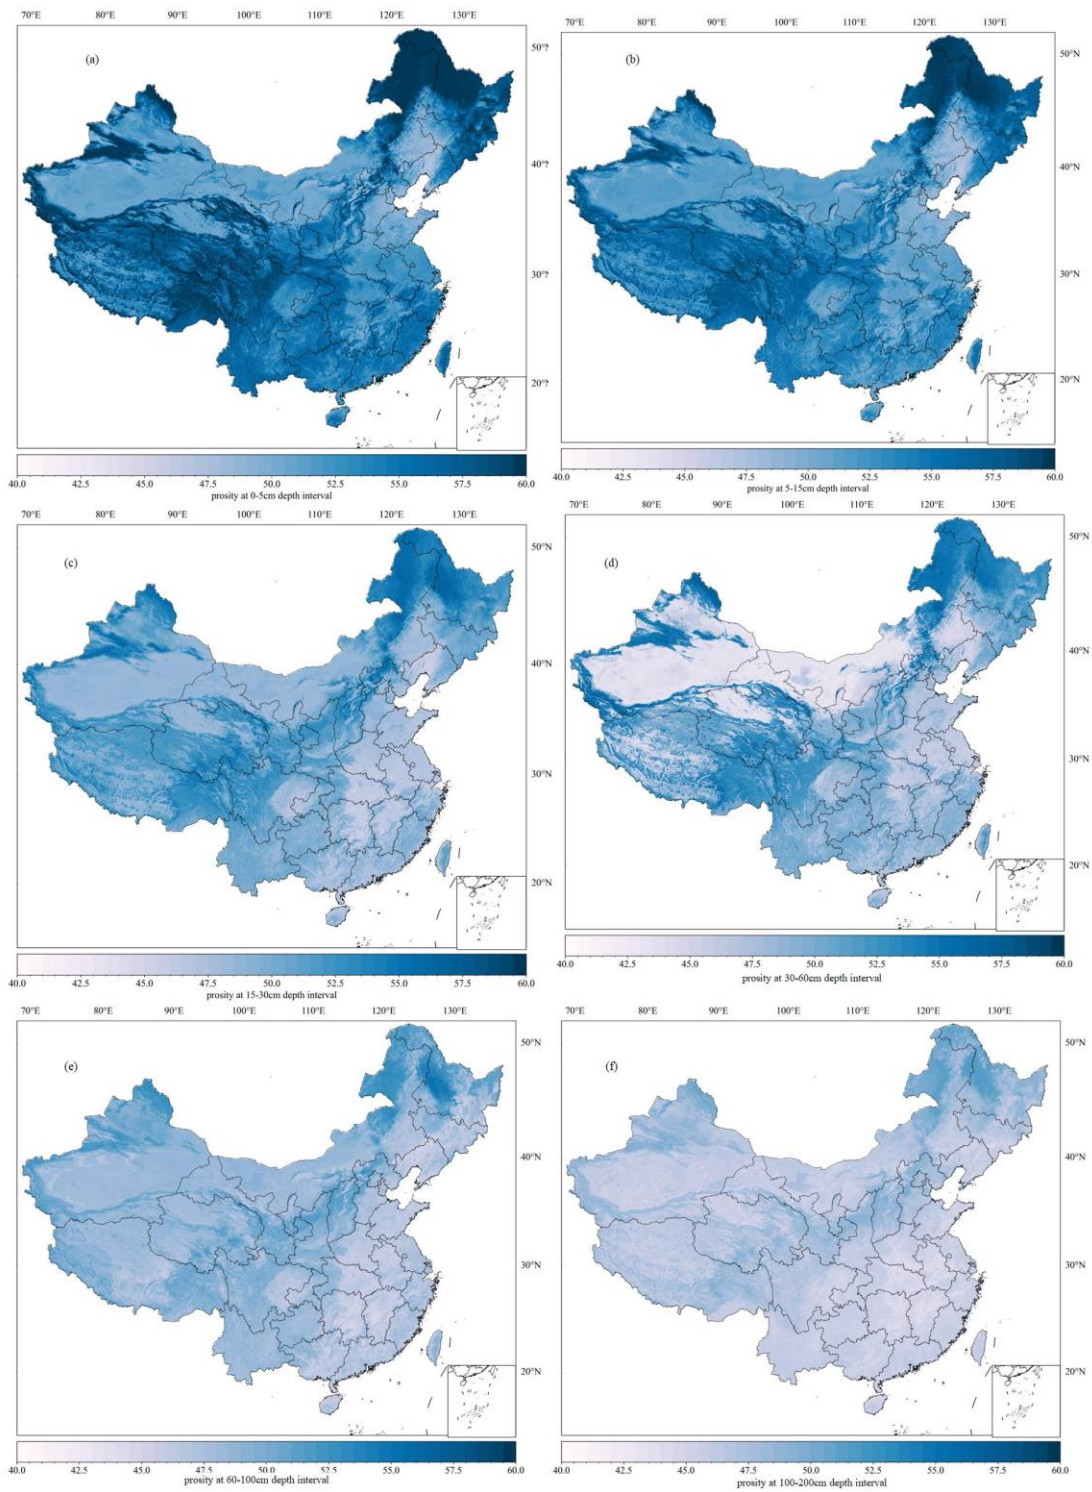

90

**Figure S7.** The predicted maps of porosity content at multiple depths. (a) 0-5 cm; (b) 5-15 cm; (c) 15-30 cm; (d) 30-60 cm; (e) 60-100 cm and (f) 100-200 cm depth interval.

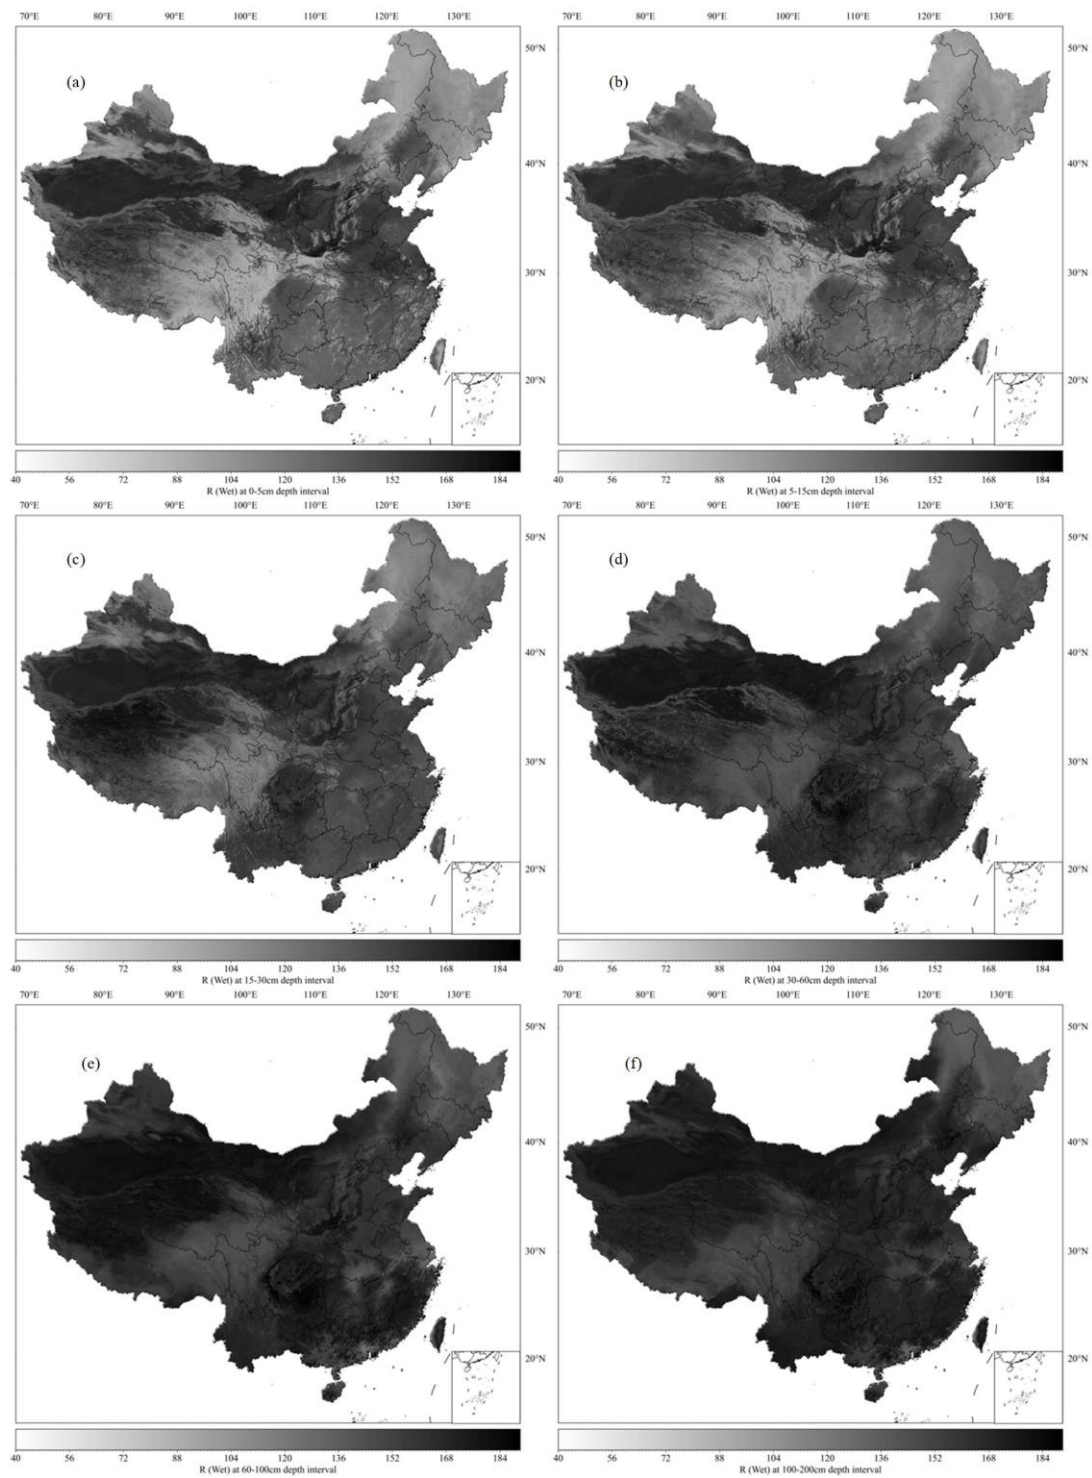

95 **Figure S8.** The predicted maps of R (Wet) content at multiple depths. (a) 0-5 cm; (b) 5-15 cm; (c) 15-30 cm; (d) 30-60 cm; (e) 60-100 cm and (f) 100-200 cm depth interval.

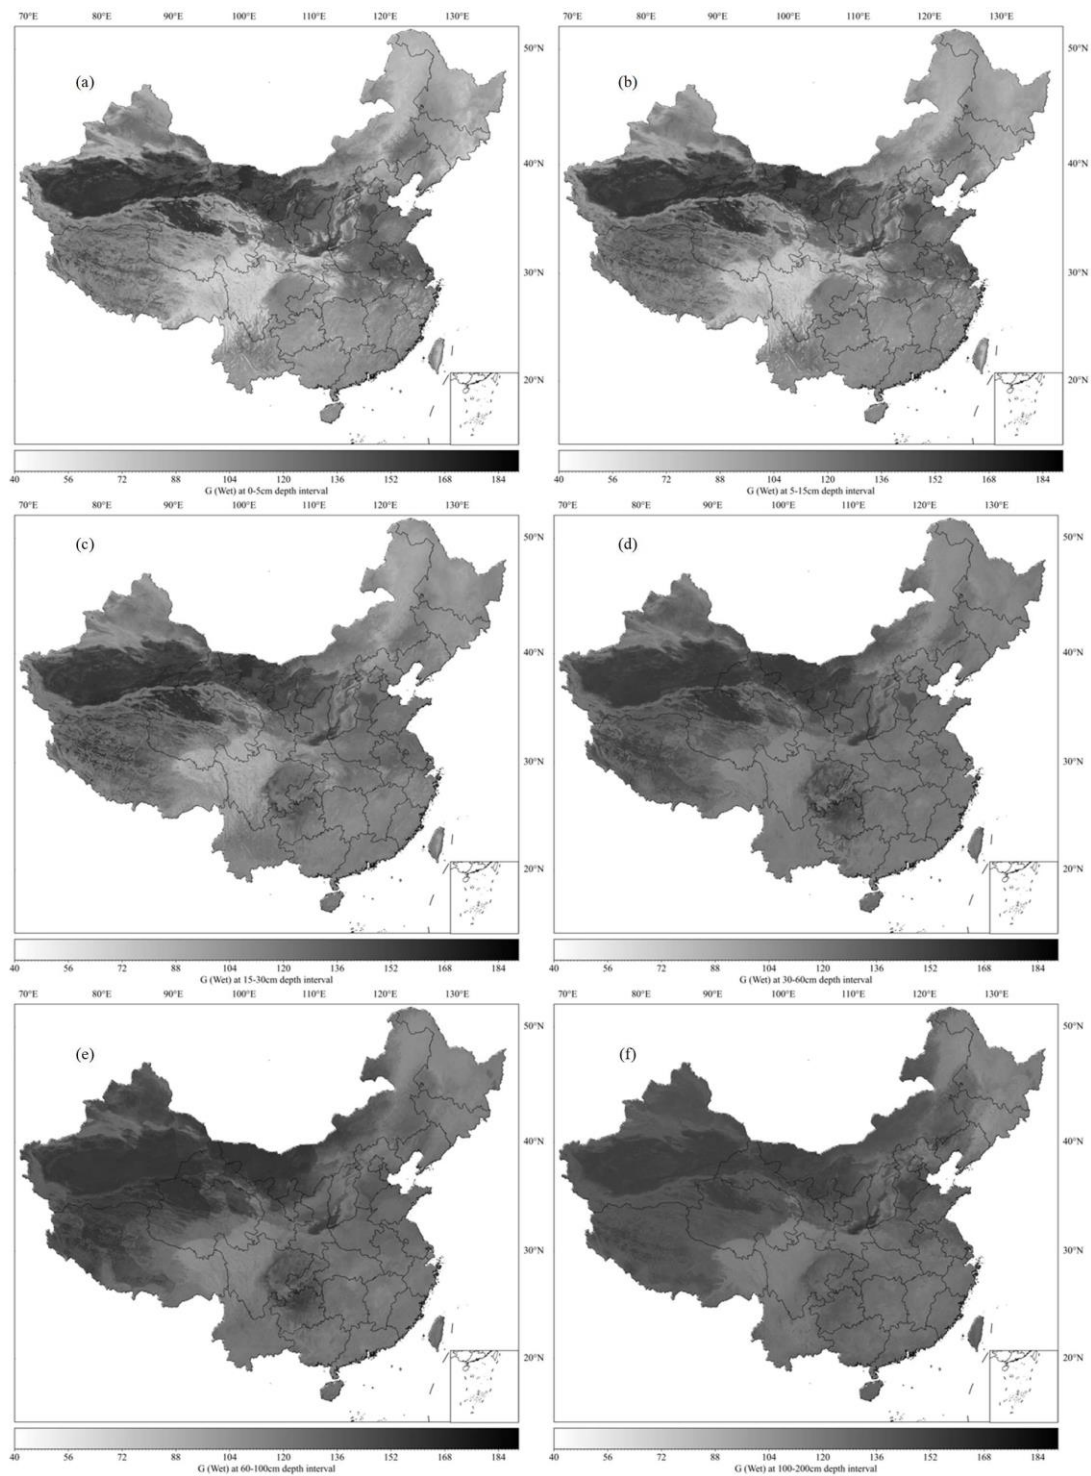

**Figure S9.** The predicted maps of G (Wet) content at multiple depths. (a) 0-5 cm; (b) 5-15 cm; (c) 15-30 cm; (d) 30-60 cm; (e) 60-100 cm and (f) 100-200 cm depth interval.

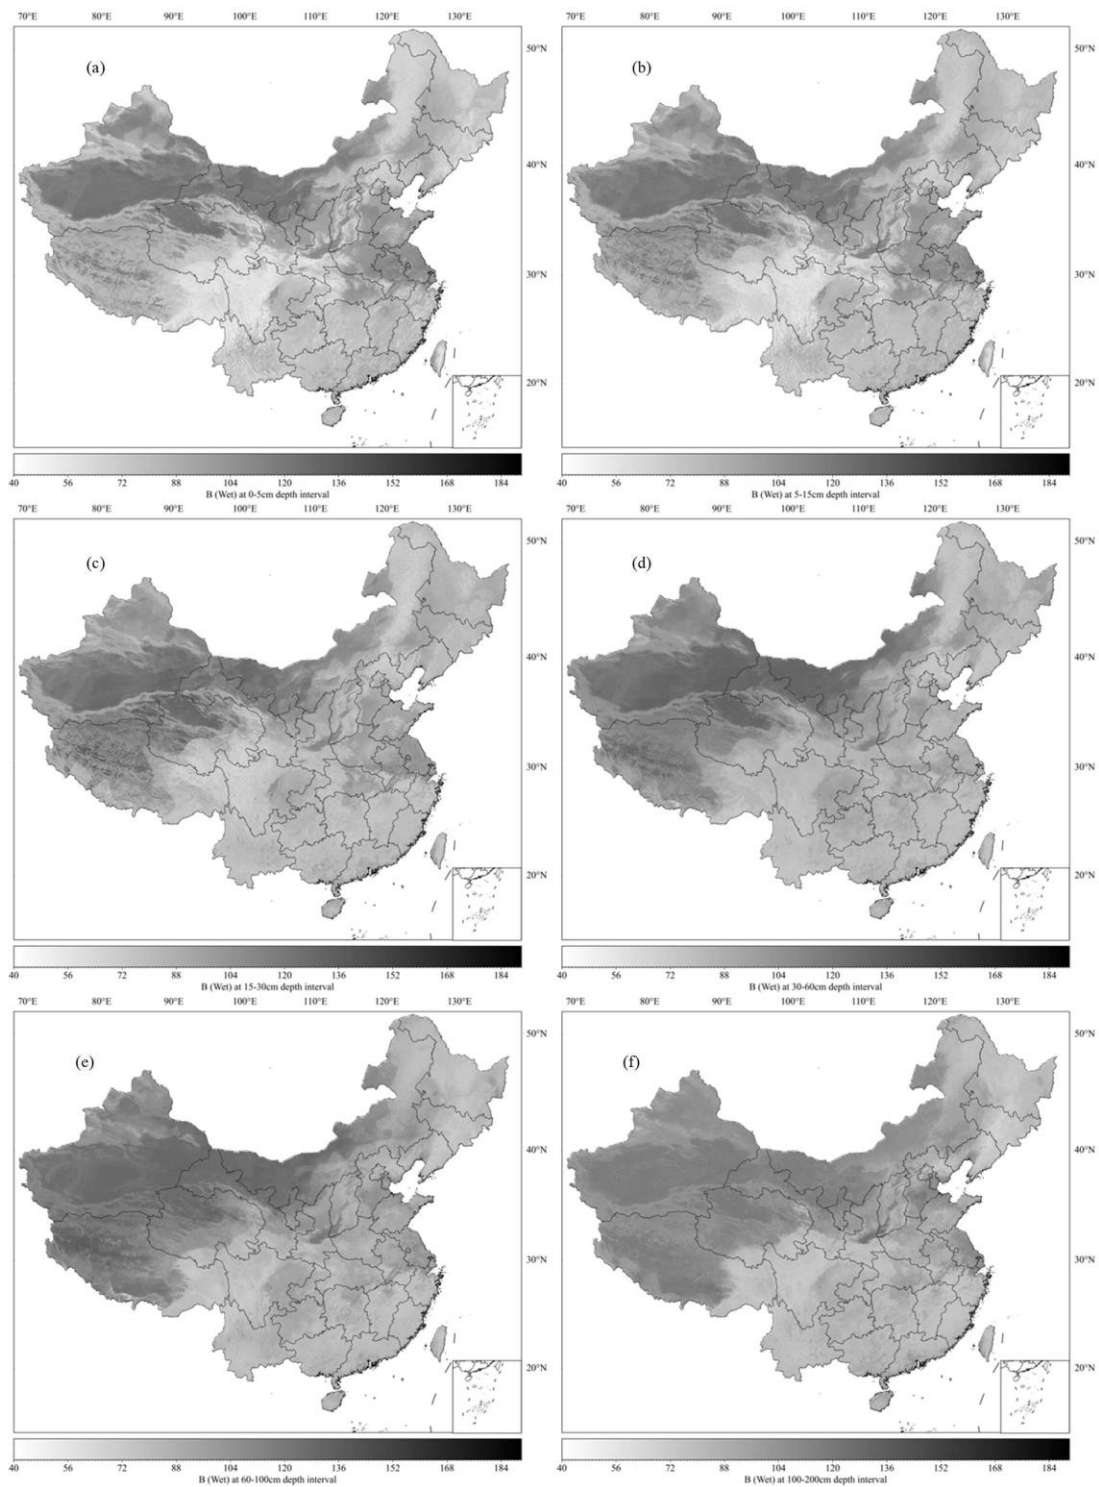

100 **Figure S10. The predicted maps of B (Wet) content at multiple depths. (a) 0-5 cm; (b) 5-15 cm; (c) 15-30 cm; (d) 30-60 cm; (e) 60-100 cm and (f) 100-200 cm depth interval.**

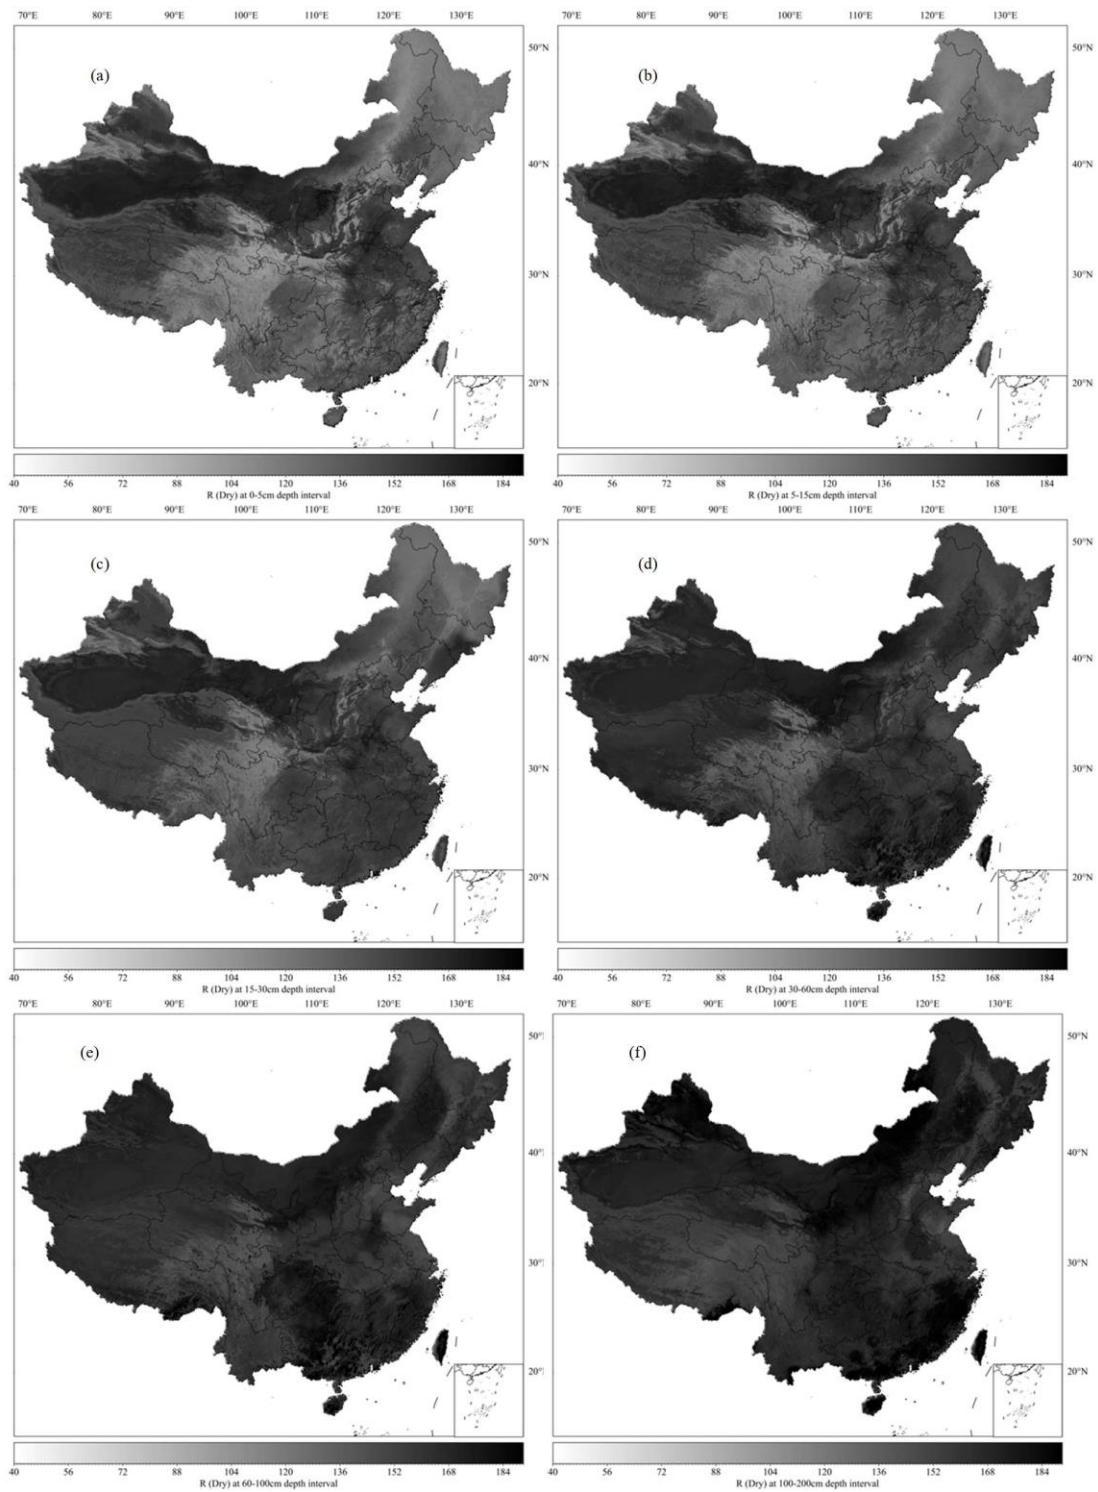

**Figure S11.** The predicted maps of R (Dry) content at multiple depths. (a) 0-5 cm; (b) 5-15 cm; (c) 15-30 cm; (d) 30-60 cm; (e) 60-100 cm and (f) 100-200 cm depth interval.

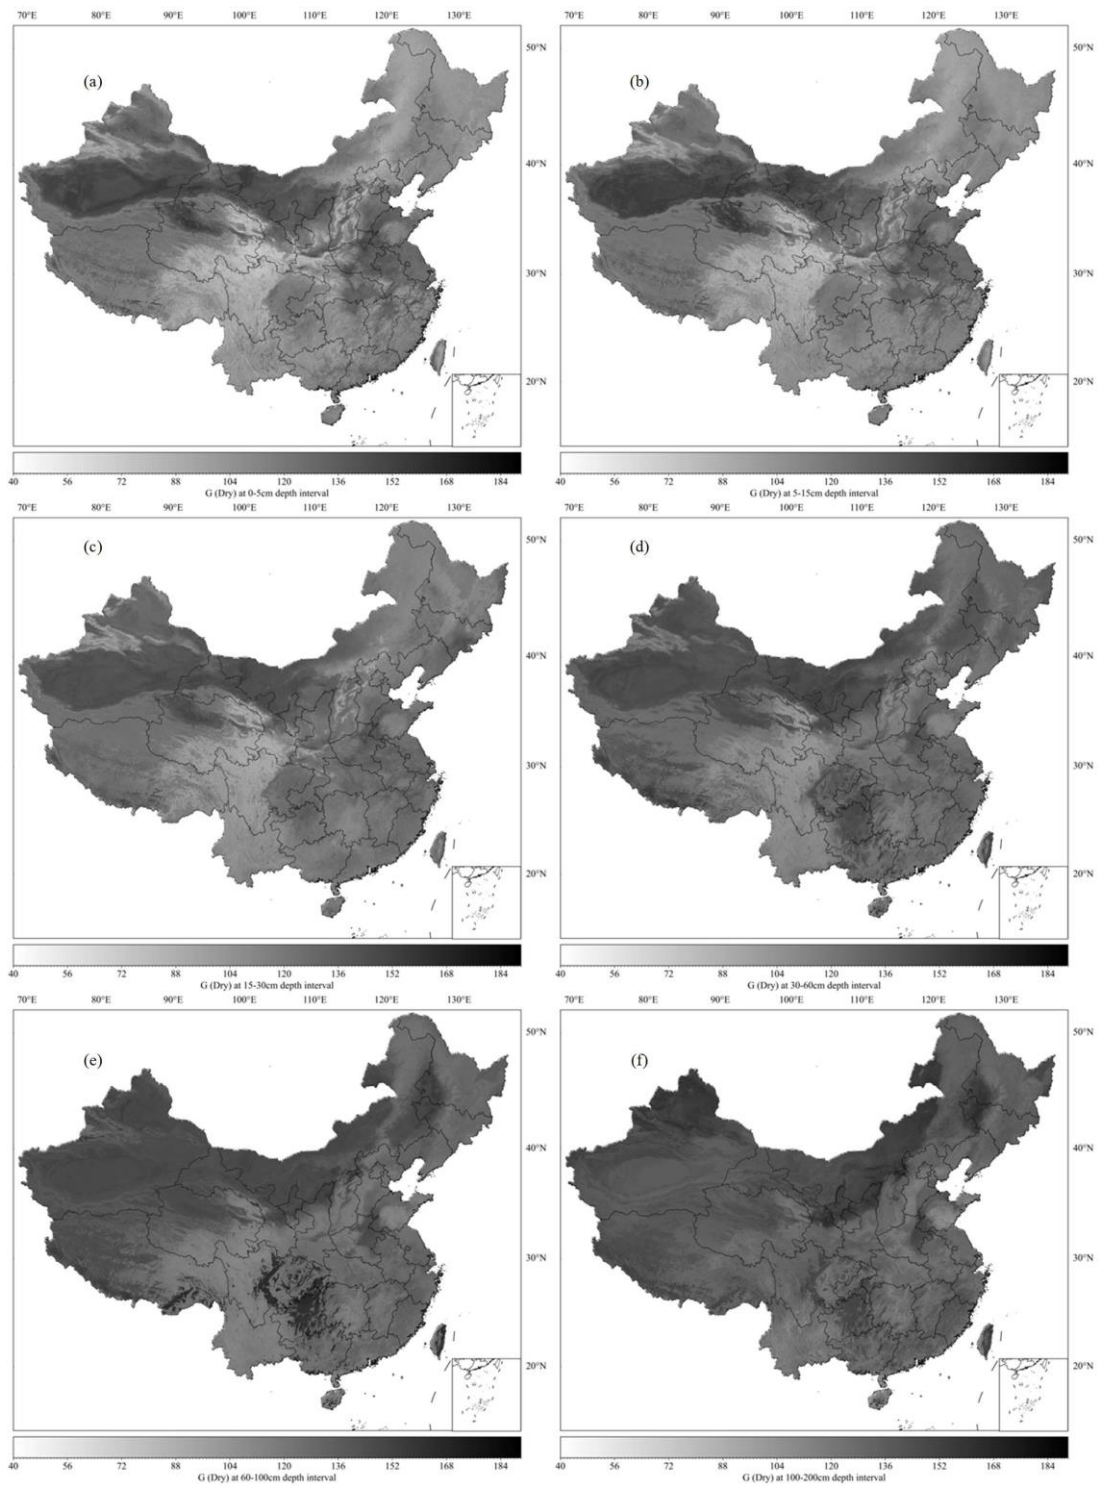

105

**Figure S12. The predicted maps of G (Dry) content at multiple depths. (a) 0-5 cm; (b) 5-15 cm; (c) 15-30 cm; (d) 30-60 cm; (e) 60-100 cm and (f) 100-200 cm depth interval.**



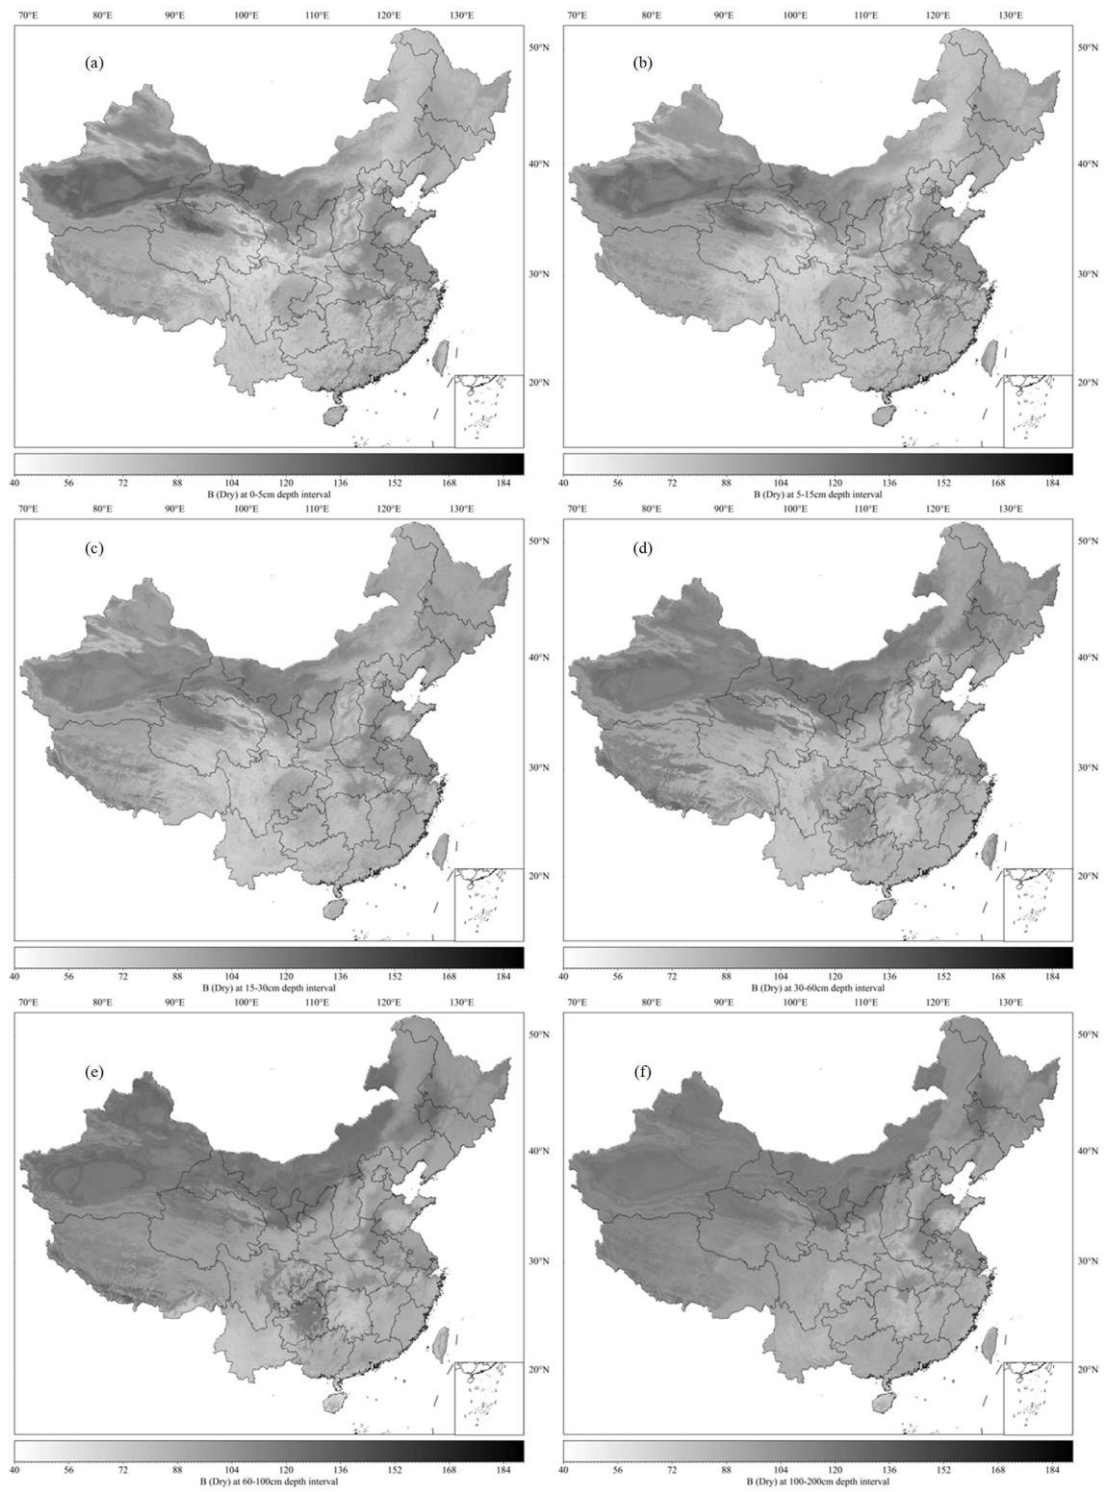

Figure S13. The predicted maps of B (Dry) content at multiple depths. (a) 0-5 cm; (b) 5-15 cm; (c) 15-30 cm; (d) 30-60 cm; (e) 60-100 cm and (f) 100-200 cm depth interval.

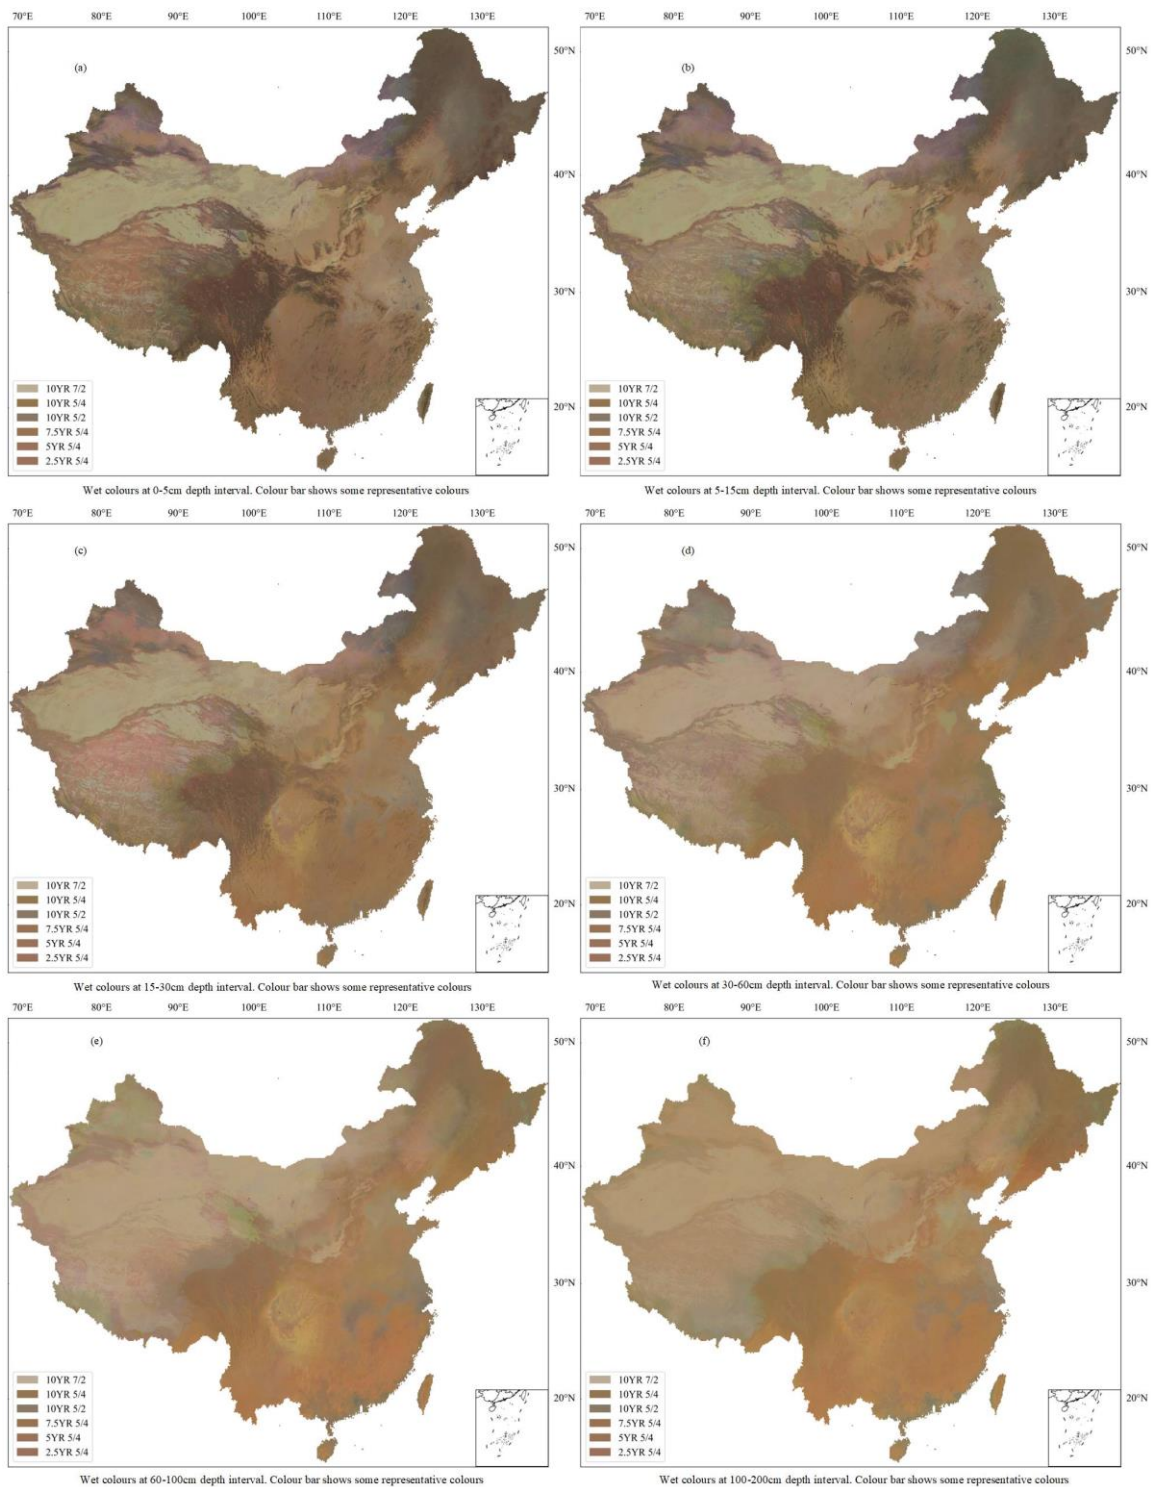

**Figure S14. The predicted maps of Wet colours at multiple depths. Colour bar shows some representative colours. (a) 0-5 cm; (b) 5-15 cm; (c) 15-30 cm; (d) 30-60 cm; (e) 60-100 cm and (f) 100-200 cm depth interval.**

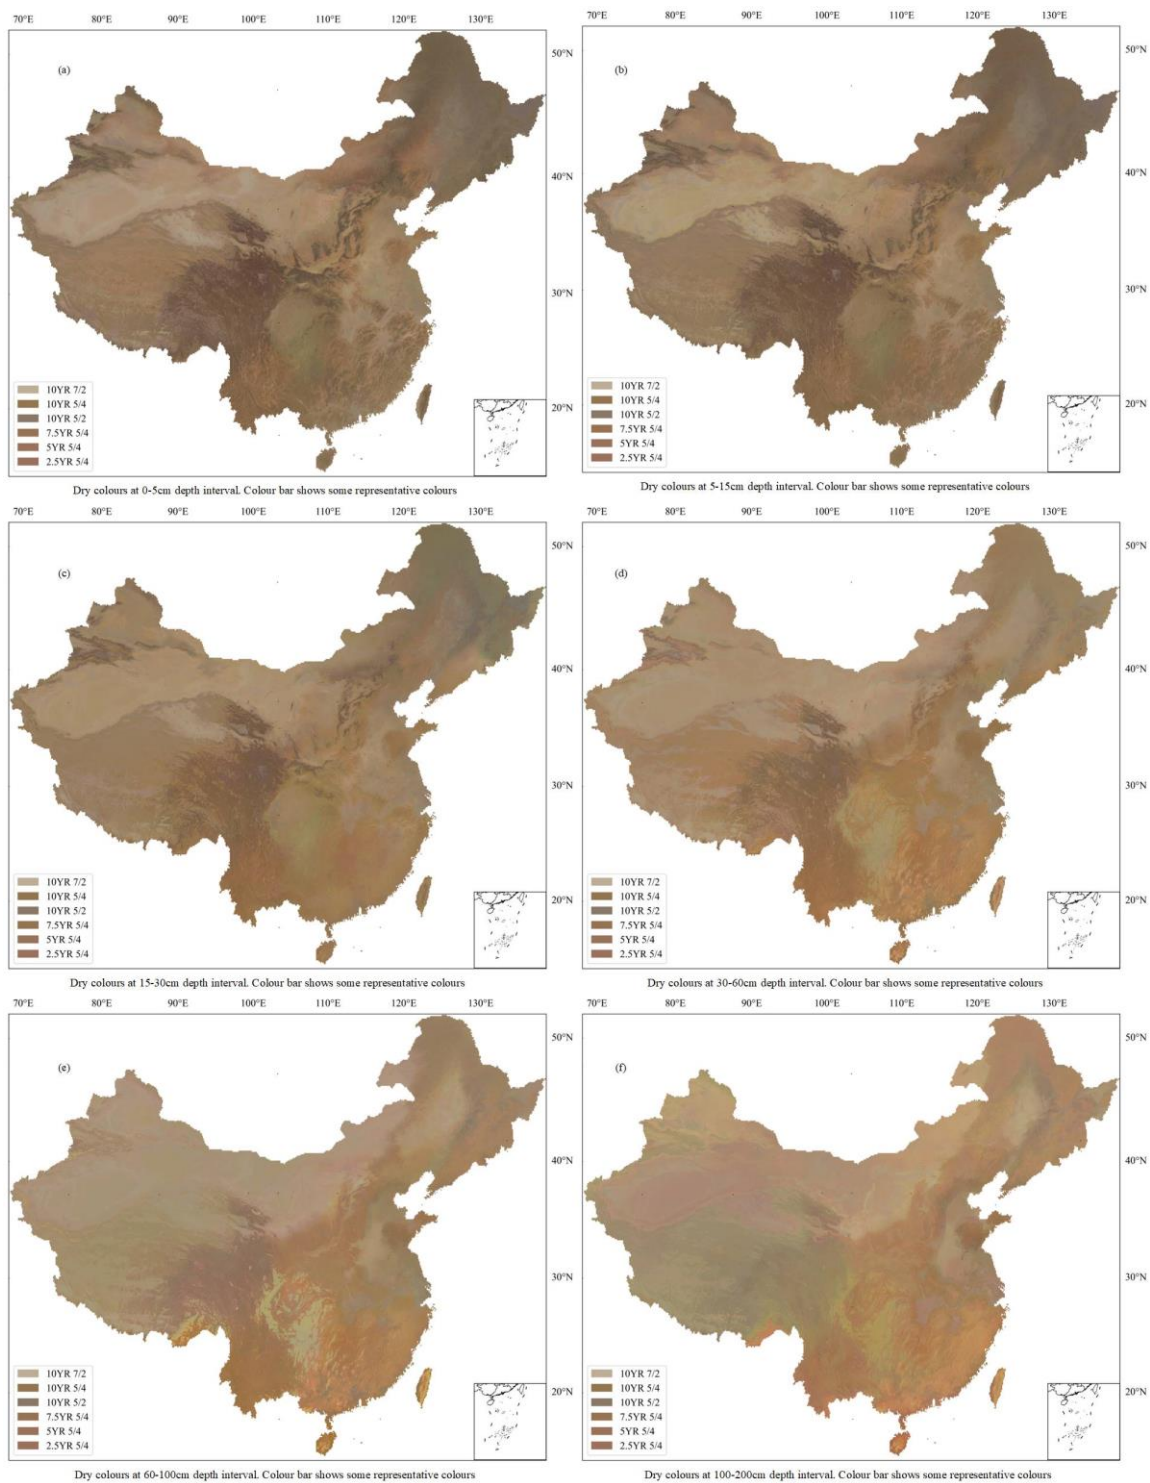

115 Figure S15. The predicted maps of Dry colours at multiple depths. Colour bar shows some representative colours. (a) 0-5 cm; (b) 5-15 cm; (c) 15-30 cm; (d) 30-60 cm; (e) 60-100 cm and (f) 100-200 cm depth interval.

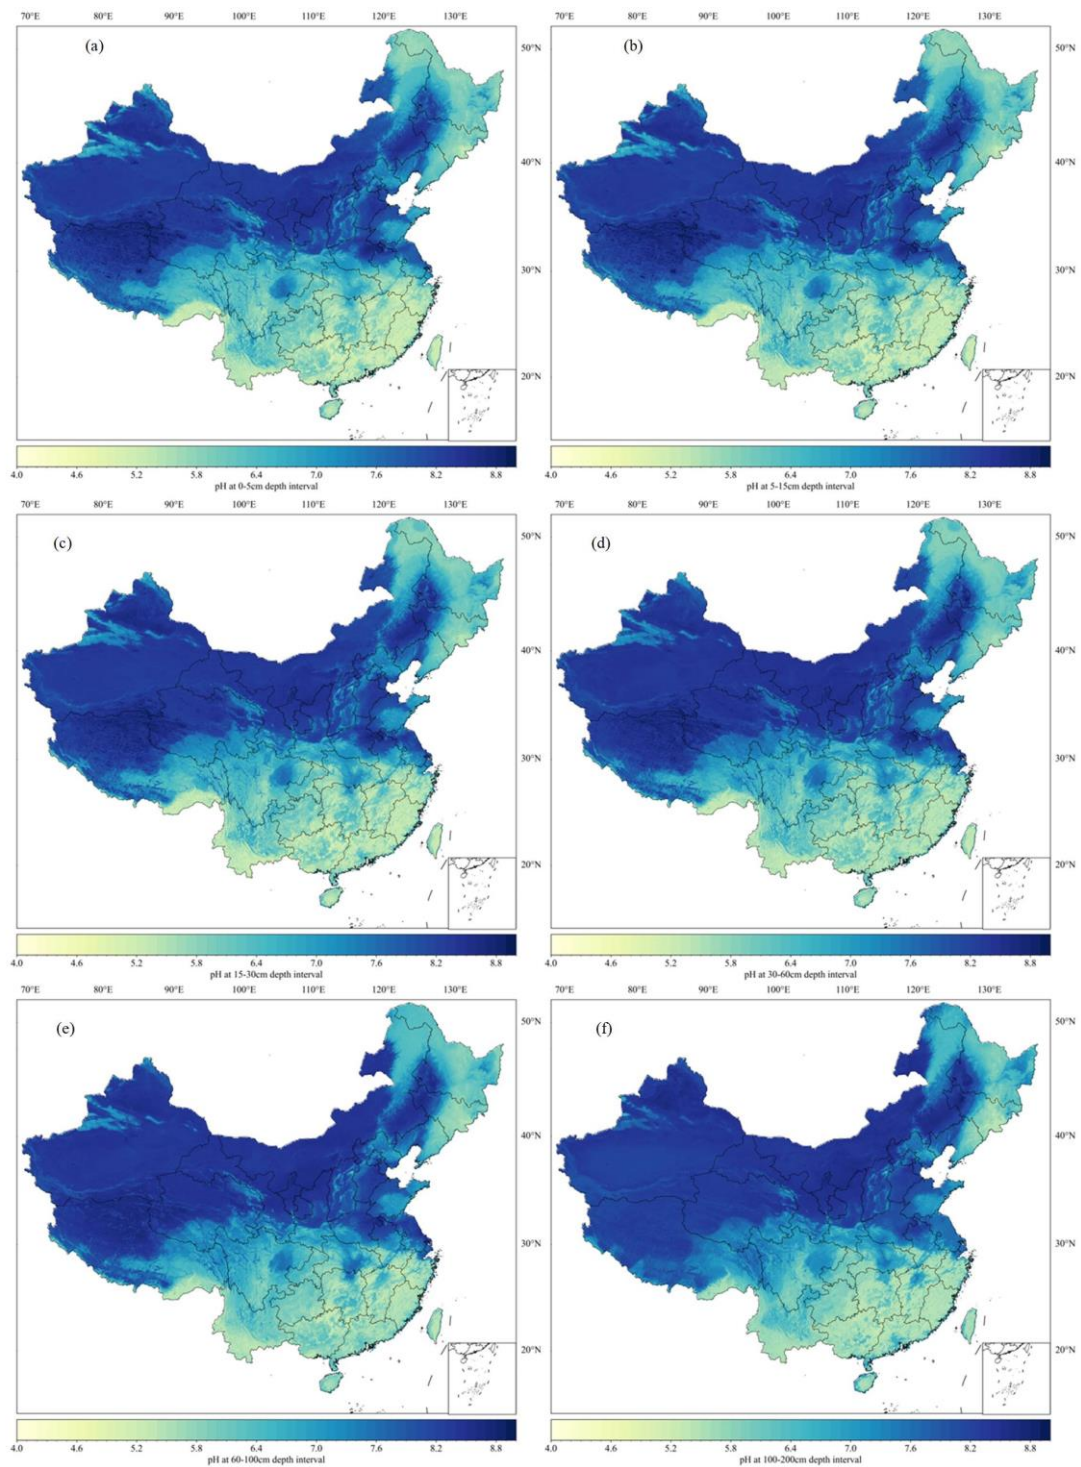

**Figure S16.** The predicted maps of soil pH at multiple depths. (a) 0-5 cm; (b) 5-15 cm; (c) 15-30 cm; (d) 30-60 cm; (e) 60-100 cm and (f) 100-200 cm depth interval.

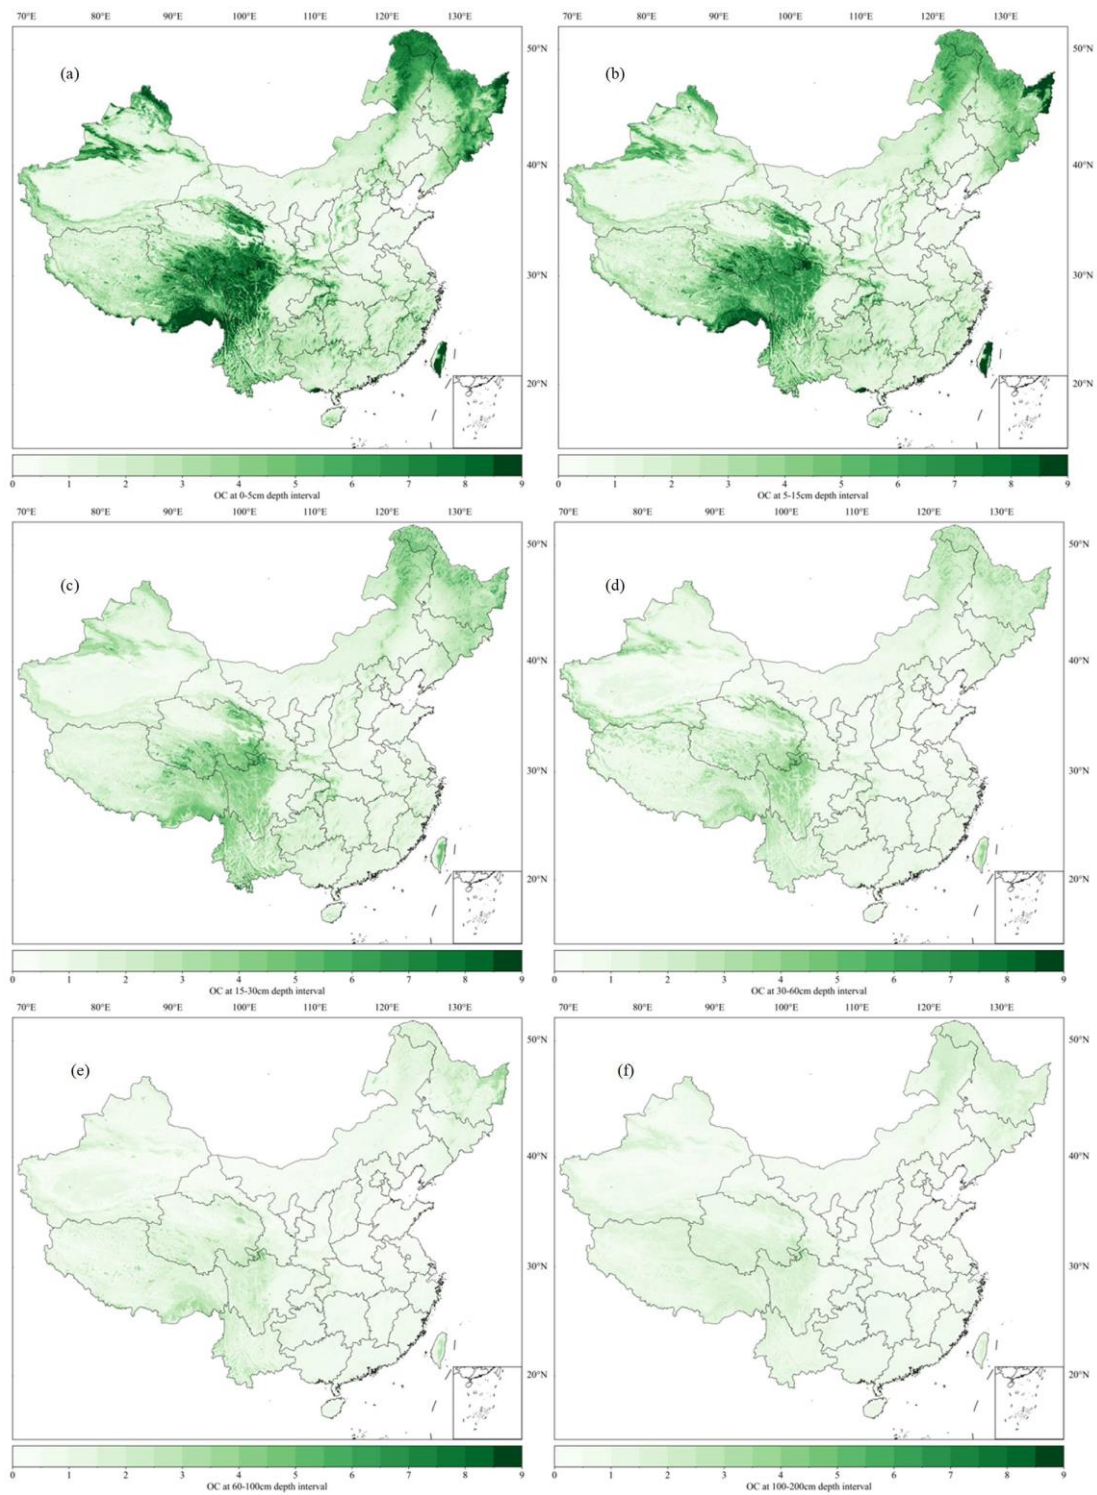

120

**Figure S17.** The predicted maps of soil organic carbon (OC) content at multiple depths. (a) 0-5 cm; (b) 5-15 cm; (c) 15-30 cm; (d) 30-60 cm; (e) 60-100 cm and (f) 100-200 cm depth interval.

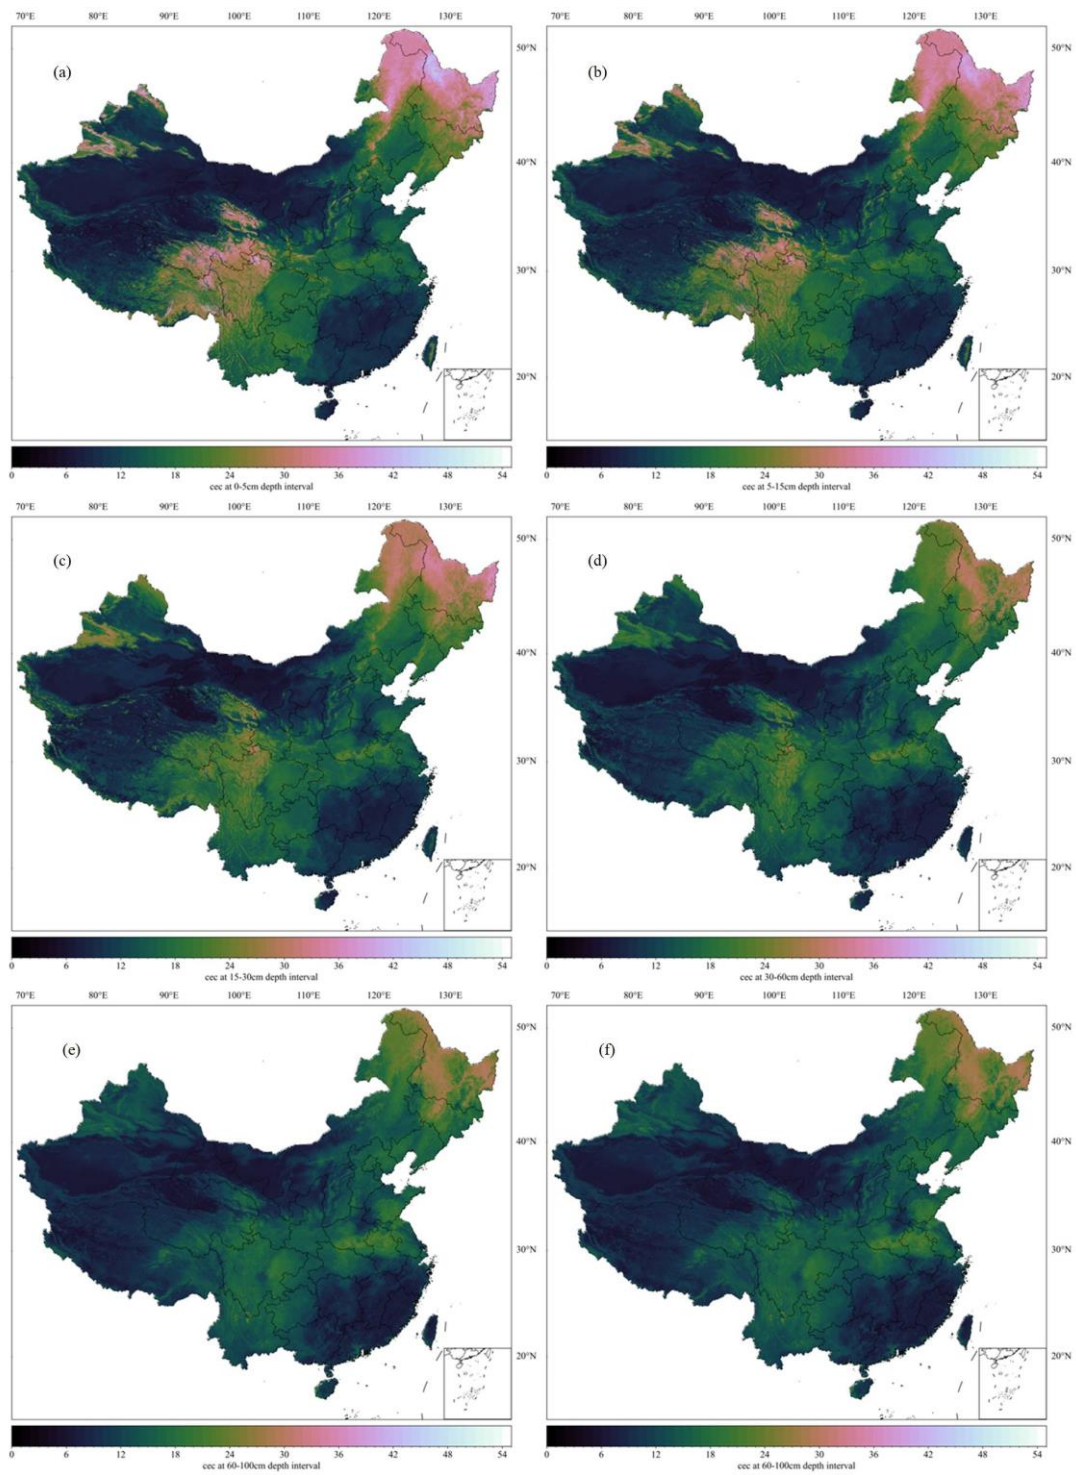

125 **Figure S18.** The predicted maps of Cation Exchange Capacity (CEC) content at multiple depths. (a) 0-5 cm; (b) 5-15 cm; (c) 15-30 cm; (d) 30-60 cm; (e) 60-100 cm and (f) 100-200 cm depth interval.

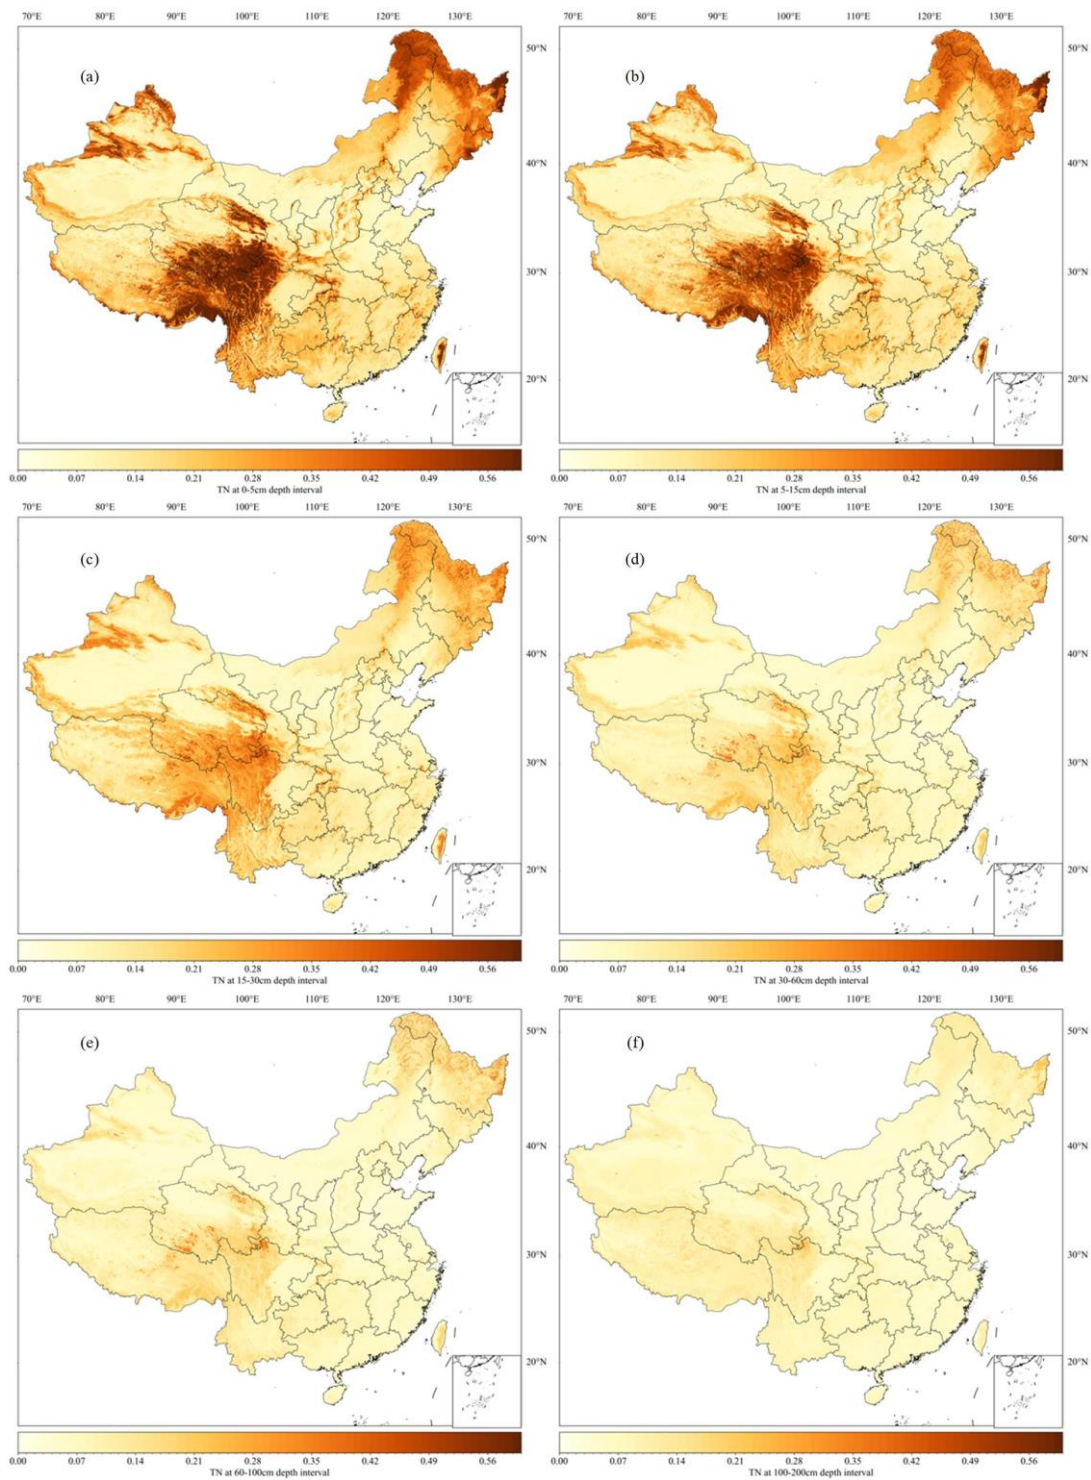

**Figure S19. The predicted maps of Total N (TN) content at multiple depths. (a) 0-5 cm; (b) 5-15 cm; (c) 15-30 cm; (d) 30-60 cm; (e) 60-100 cm and (f) 100-200 cm depth interval.**

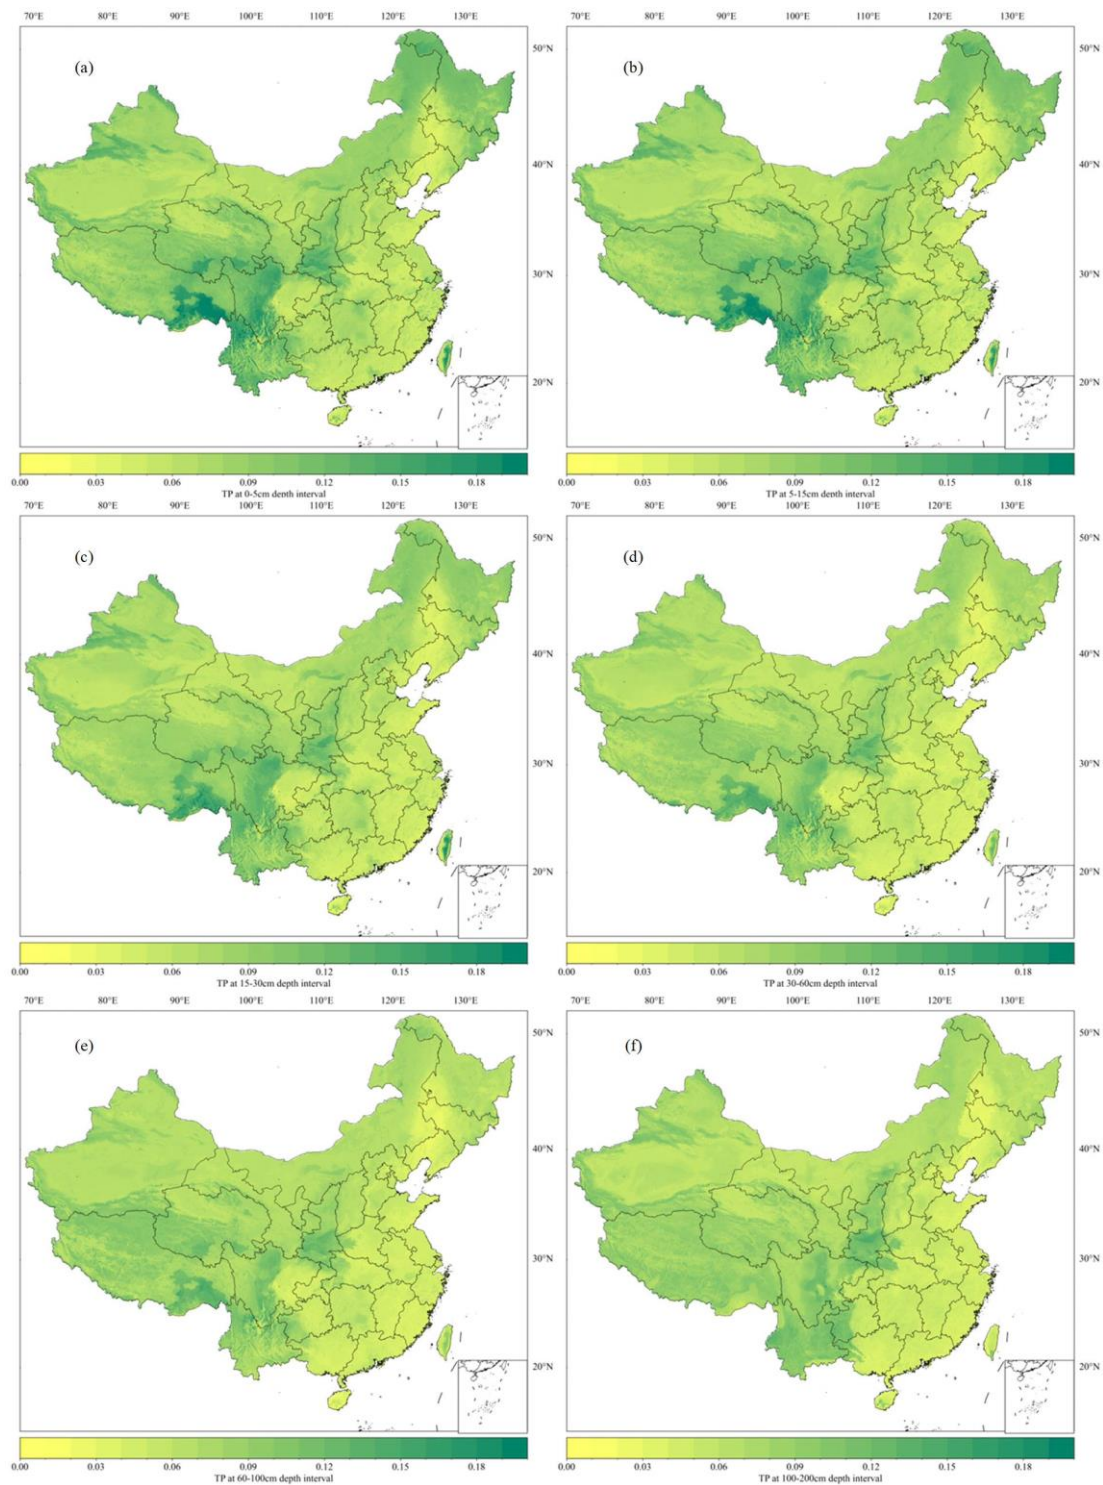

130 **Figure S20. The predicted maps of Total P (TP) content at multiple depths. (a) 0-5 cm; (b) 5-15 cm; (c) 15-30 cm; (d) 30-60 cm; (e) 60-100 cm and (f) 100-200 cm depth interval.**



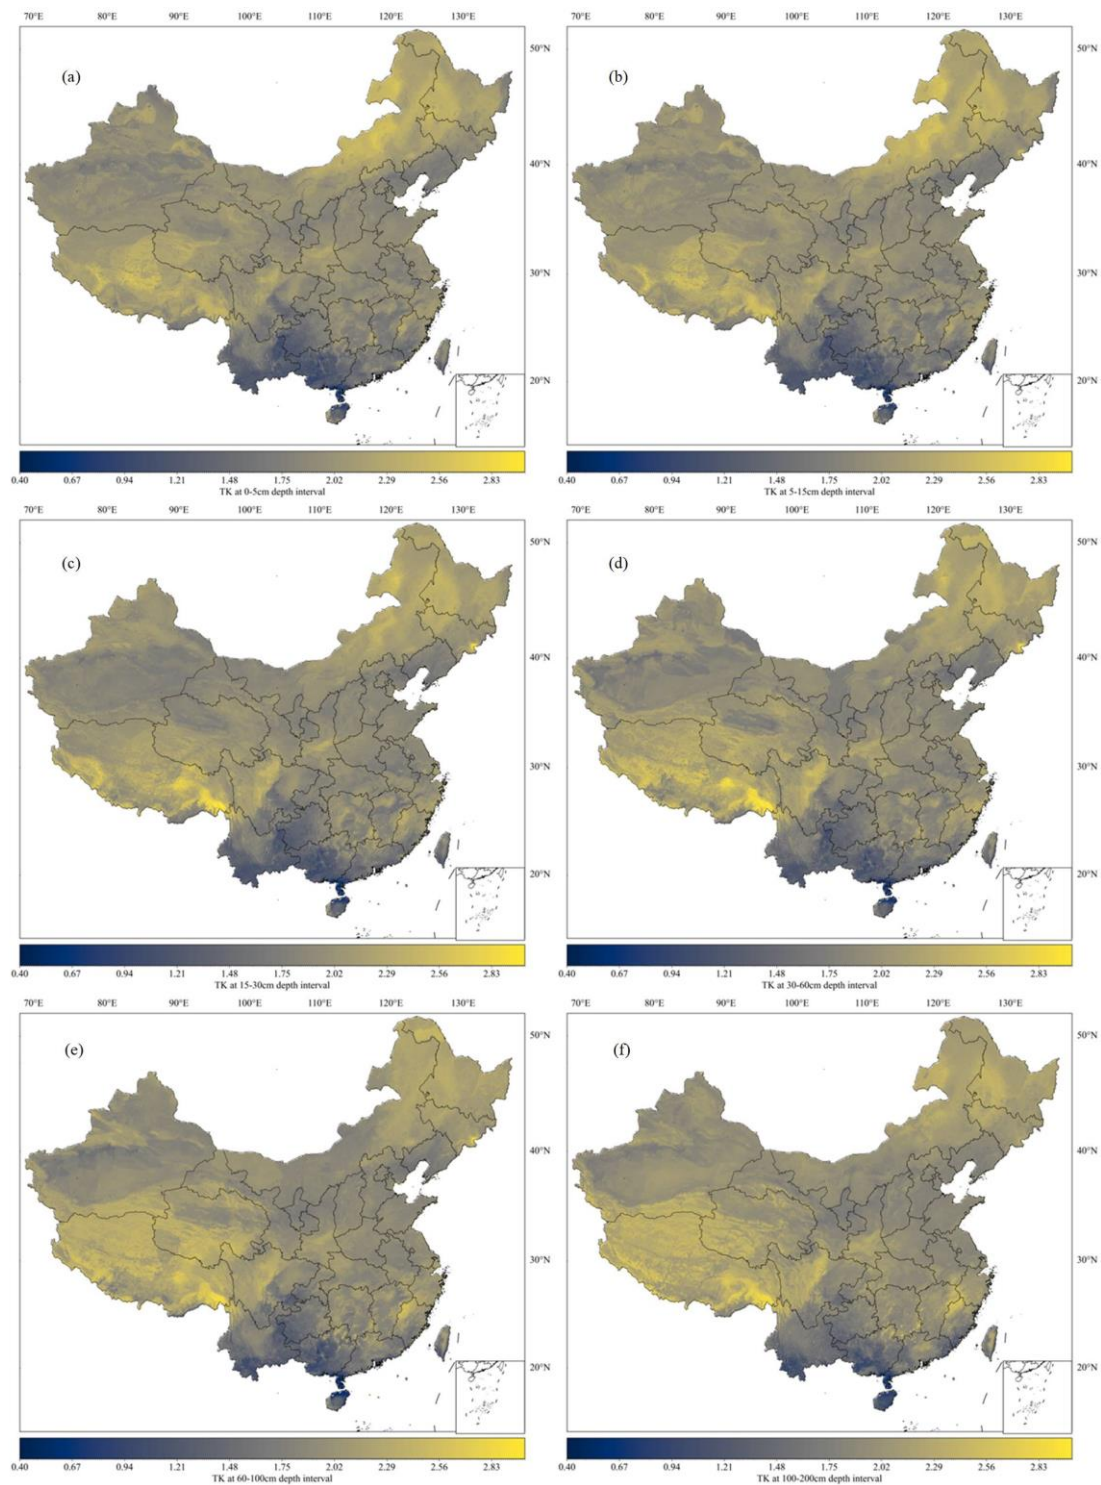

**Figure S21. The predicted maps of Total K (TK) content at multiple depths. (a) 0-5 cm; (b) 5-15 cm; (c) 15-30 cm; (d) 30-60 cm; (e) 60-100 cm and (f) 100-200 cm depth interval.**

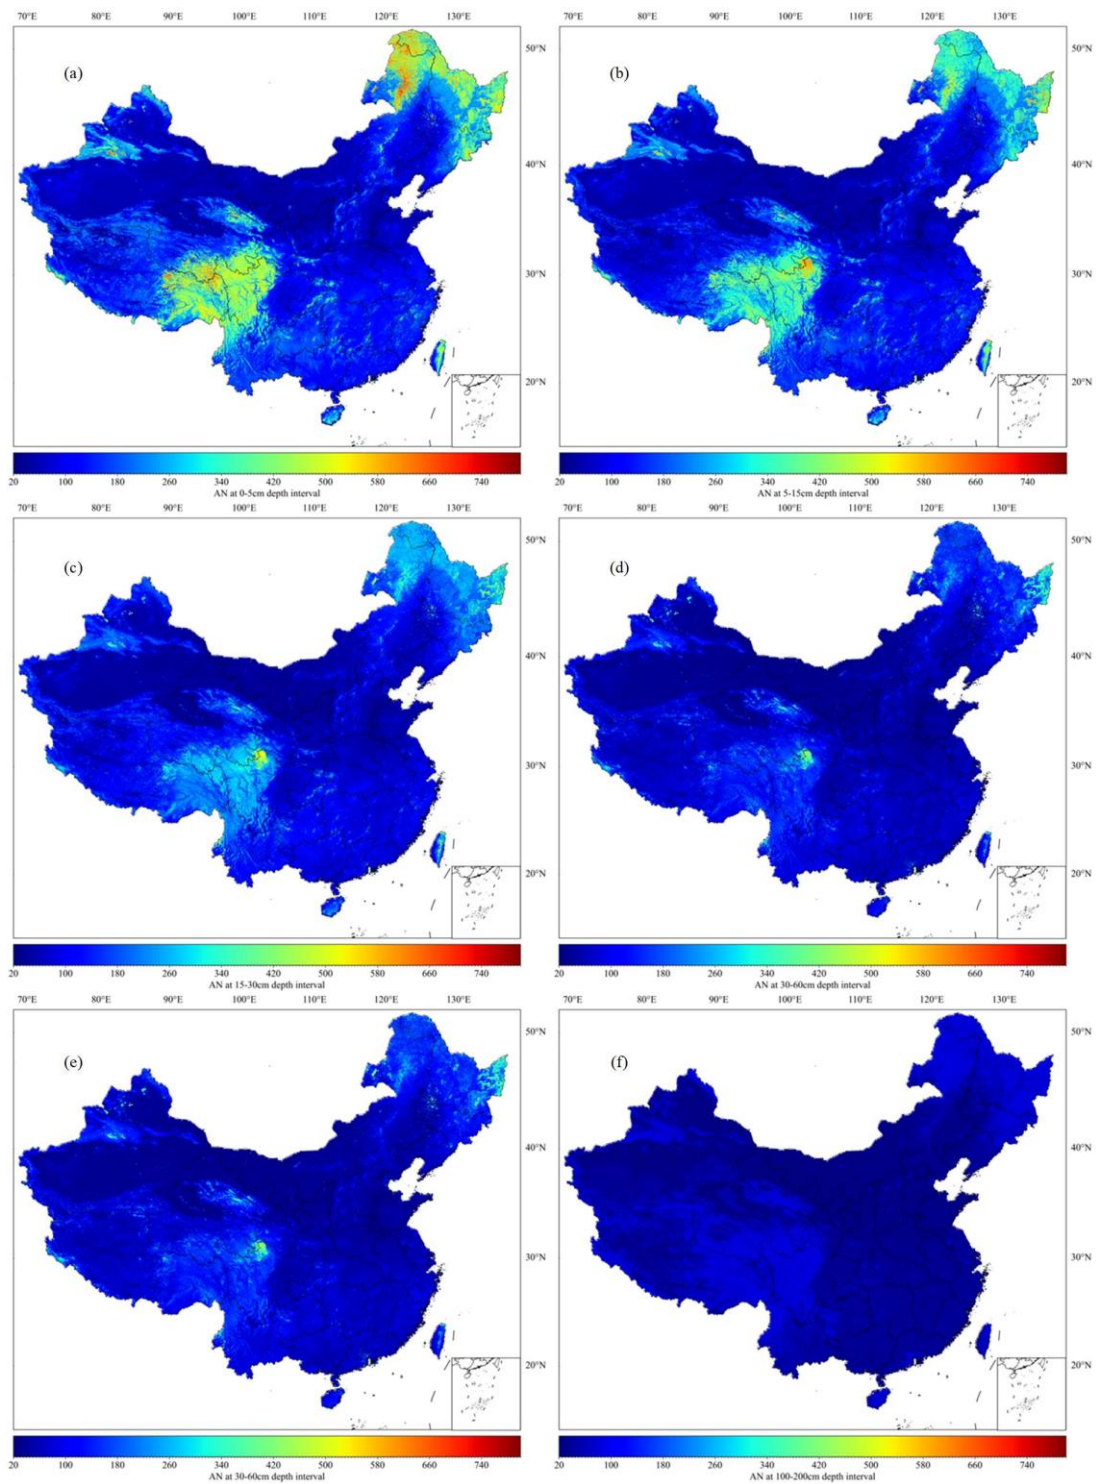

135

**Figure S22.** The predicted maps of Alkali-hydrolysable N (AN) content at multiple depths. (a) 0-5 cm; (b) 5-15 cm; (c) 15-30 cm; (d) 30-60 cm; (e) 60-100 cm and (f) 100-200 cm depth interval.

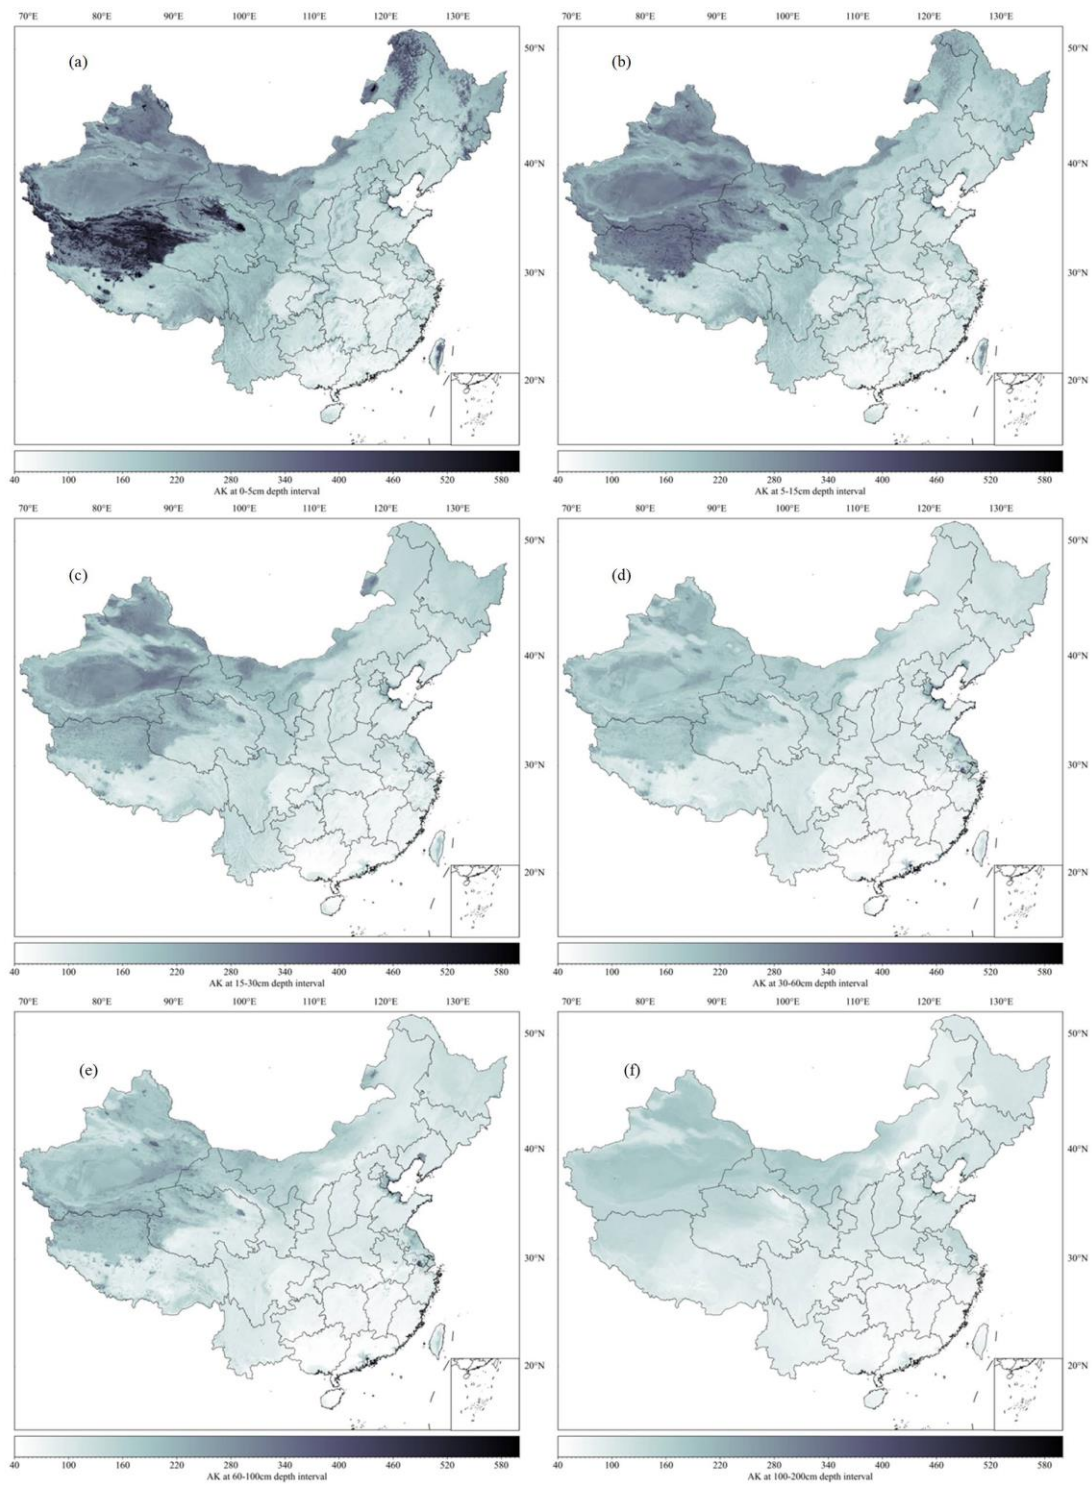

140 **Figure S23.** The predicted maps of Available K (AK) content at multiple depths. (a) 0-5 cm; (b) 5-15 cm; (c) 15-30 cm; (d) 30-60 cm; (e) 60-100 cm and (f) 100-200 cm depth interval.

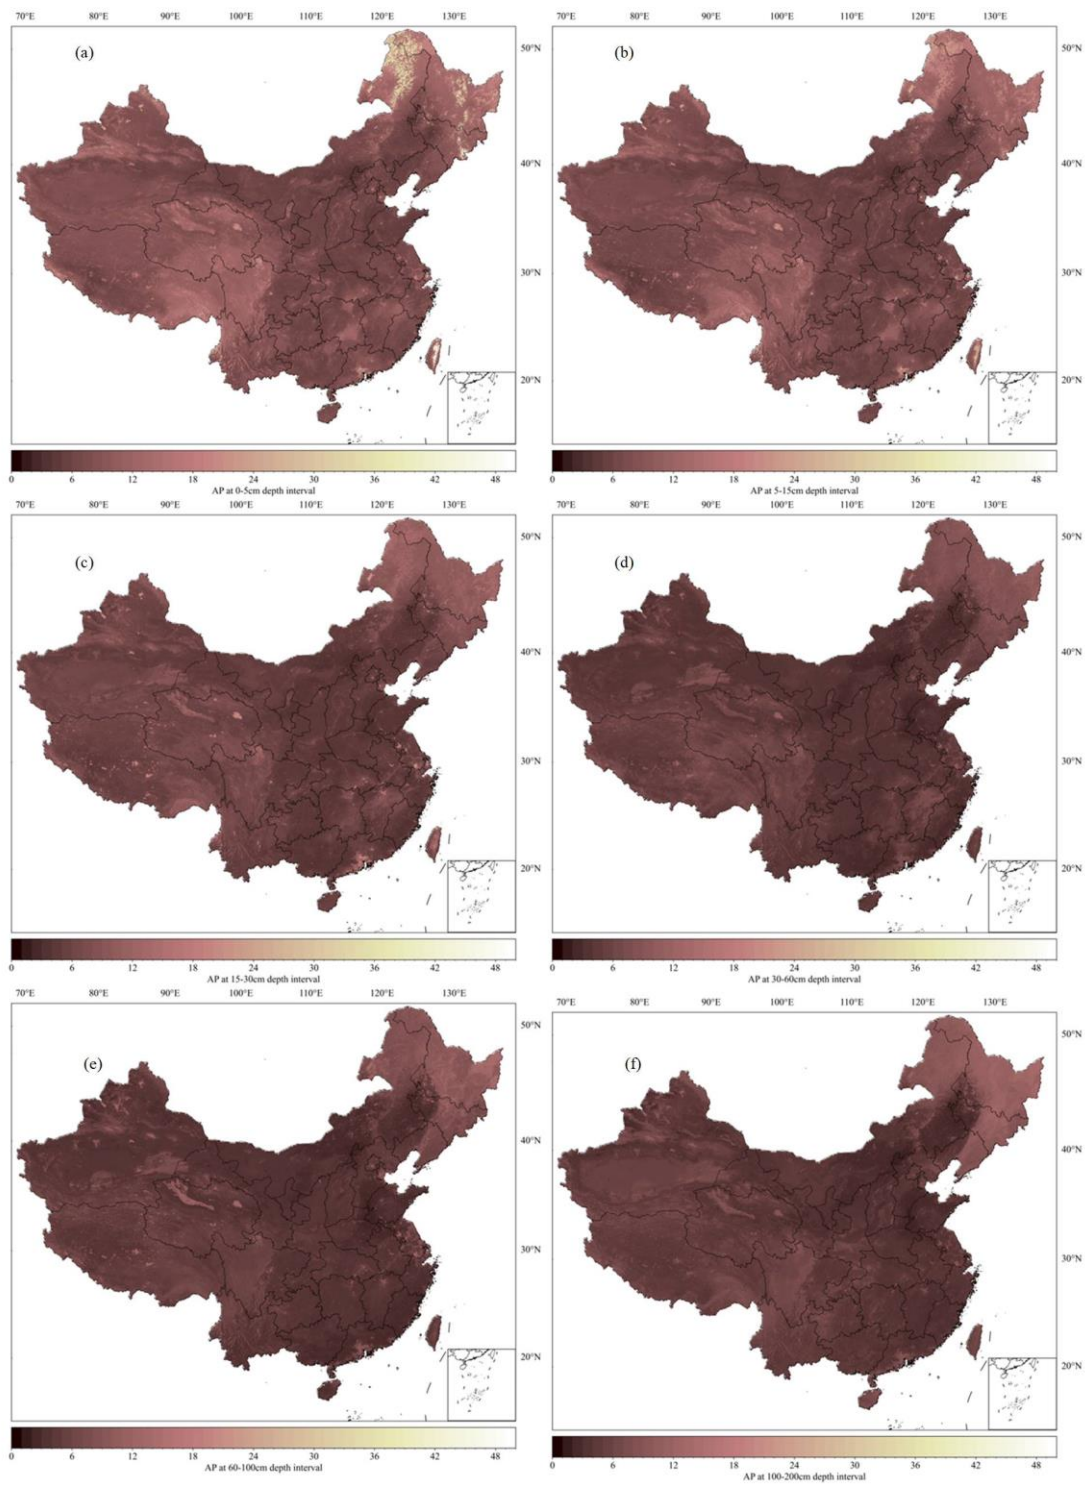

**Figure S24.** The predicted maps of Available P (AP) content at multiple depths. (a) 0-5 cm; (b) 5-15 cm; (c) 15-30 cm; (d) 30-60 cm; (e) 60-100 cm and (f) 100-200 cm depth interval.

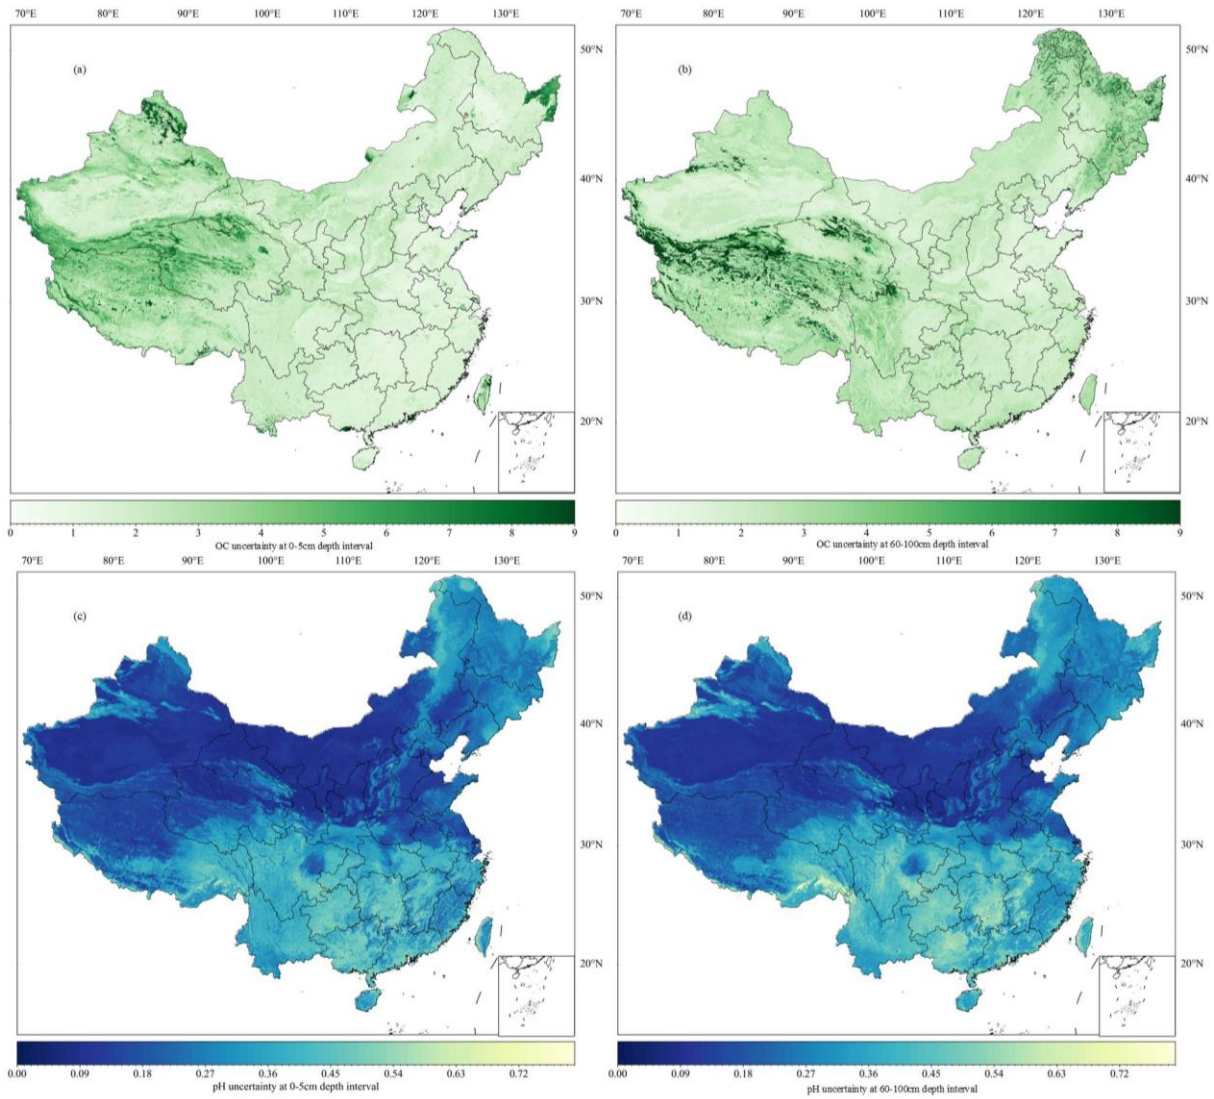

145 **Figure S25.** The maps of uncertainty of the soil pH and organic carbon (OC) predictions at 0-5 cm (a, c) and 60-100 cm (b, d) depth interval.

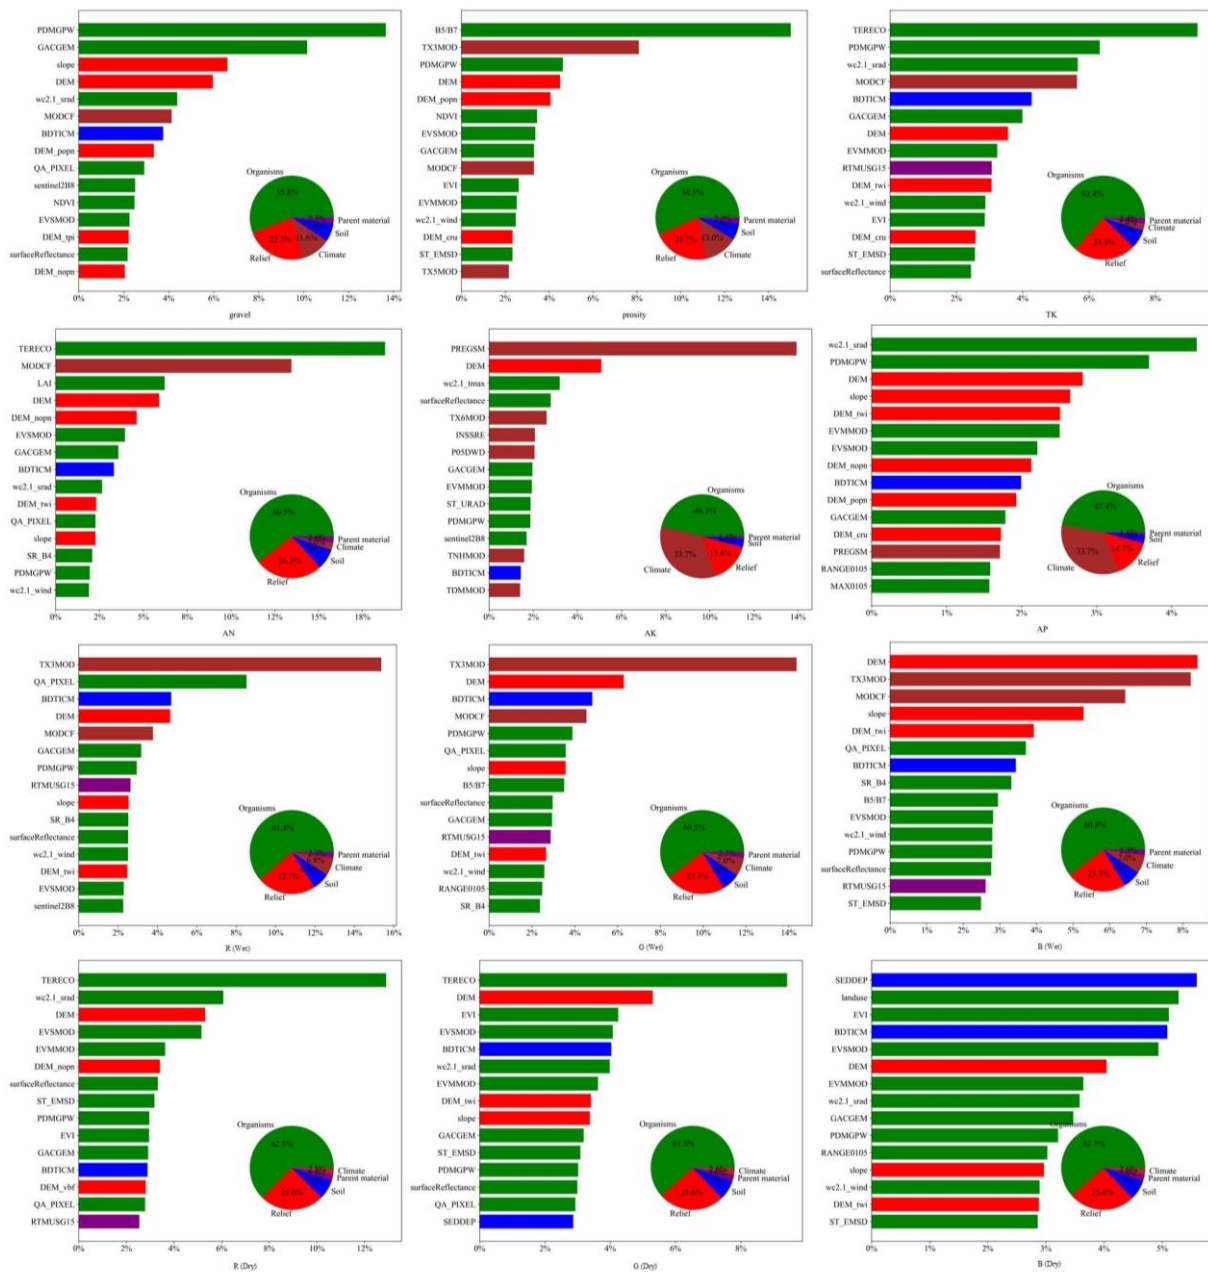

150 **Figure S26. Relative importance of predictors for the Quantile Regression Forest model in the spatial predictions of alkali-hydrolysable nitrogen (AN), rock fragment (gravel), porosity, total potassium (TK), available potassium (AK), available phosphorus (AP), wet color (R, G, B), and dry color (R, G, B) at the surface layer (0-5 cm). See Table S6 for abbreviations of the environmental covariates.**

**Table S1. List of environmental covariates used to characterize soil-forming environments.**

| <b>Factors definitions</b> | <b>Description</b>           | <b>Resolution (m)</b> | <b>Source data set</b>                                                                                                                                                                                                          |
|----------------------------|------------------------------|-----------------------|---------------------------------------------------------------------------------------------------------------------------------------------------------------------------------------------------------------------------------|
| <b>Soil (28)</b>           |                              |                       |                                                                                                                                                                                                                                 |
| STGHWS <sup>1</sup>        | Dominant soil group          | 5000                  | <a href="https://www.fao.org/soils-portal/data-hub/soil-maps-and-databases/harmonized-world-soil-database-v12/en/">https://www.fao.org/soils-portal/data-hub/soil-maps-and-databases/harmonized-world-soil-database-v12/en/</a> |
| GVRHWS                     | Percent coverage Vertisols   | 1000                  | <a href="https://www.fao.org/soils-portal/data-hub/soil-maps-and-databases/harmonized-world-soil-database-v34/en/">https://www.fao.org/soils-portal/data-hub/soil-maps-and-databases/harmonized-world-soil-database-v34/en/</a> |
| GUMHWS                     | Percent coverage Umbrisols   | 1000                  | <a href="https://www.fao.org/soils-portal/data-hub/soil-maps-and-databases/harmonized-world-soil-database-v33/en/">https://www.fao.org/soils-portal/data-hub/soil-maps-and-databases/harmonized-world-soil-database-v33/en/</a> |
| GSTHWS                     | Percent coverage Stagnosols  | 1000                  | <a href="https://www.fao.org/soils-portal/data-hub/soil-maps-and-databases/harmonized-world-soil-database-v37/en/">https://www.fao.org/soils-portal/data-hub/soil-maps-and-databases/harmonized-world-soil-database-v37/en/</a> |
| GSNHWS                     | Percent coverage Solonetz    | 1000                  | <a href="https://www.fao.org/soils-portal/data-hub/soil-maps-and-databases/harmonized-world-soil-database-v32/en/">https://www.fao.org/soils-portal/data-hub/soil-maps-and-databases/harmonized-world-soil-database-v32/en/</a> |
| GSCHWS                     | Percent coverage Solonchaks  | 1000                  | <a href="https://www.fao.org/soils-portal/data-hub/soil-maps-and-databases/harmonized-world-soil-database-v31/en/">https://www.fao.org/soils-portal/data-hub/soil-maps-and-databases/harmonized-world-soil-database-v31/en/</a> |
| GRGHWS                     | Percent coverage Regosols    | 1000                  | <a href="https://www.fao.org/soils-portal/data-hub/soil-maps-and-databases/harmonized-world-soil-database-v30/en/">https://www.fao.org/soils-portal/data-hub/soil-maps-and-databases/harmonized-world-soil-database-v30/en/</a> |
| GPZHWS                     | Percent coverage Podzols     | 1000                  | <a href="https://www.fao.org/soils-portal/data-hub/soil-maps-and-databases/harmonized-world-soil-database-v29/en/">https://www.fao.org/soils-portal/data-hub/soil-maps-and-databases/harmonized-world-soil-database-v29/en/</a> |
| GPTHWS                     | Percent coverage Plinthosols | 1000                  | <a href="https://www.fao.org/soils-portal/data-hub/soil-maps-and-databases/harmonized-world-soil-database-v28/en/">https://www.fao.org/soils-portal/data-hub/soil-maps-and-databases/harmonized-world-soil-database-v28/en/</a> |

| <b>Factors definitions</b> | <b>Description</b>           | <b>Resolution (m)</b> | <b>Source data set</b>                                                                                                                                                                                                          |
|----------------------------|------------------------------|-----------------------|---------------------------------------------------------------------------------------------------------------------------------------------------------------------------------------------------------------------------------|
| GPLHWS                     | Percent coverage Planosols   | 1000                  | <a href="https://www.fao.org/soils-portal/data-hub/soil-maps-and-databases/harmonized-world-soil-database-v27/en/">https://www.fao.org/soils-portal/data-hub/soil-maps-and-databases/harmonized-world-soil-database-v27/en/</a> |
| GLPHWS <sup>1</sup>        | Percent coverage Leptosols   | 1000                  | <a href="https://www.fao.org/soils-portal/data-hub/soil-maps-and-databases/harmonized-world-soil-database-v26/en/">https://www.fao.org/soils-portal/data-hub/soil-maps-and-databases/harmonized-world-soil-database-v26/en/</a> |
| GKSHWS                     | Percent coverage Kastanozems | 1000                  | <a href="https://www.fao.org/soils-portal/data-hub/soil-maps-and-databases/harmonized-world-soil-database-v25/en/">https://www.fao.org/soils-portal/data-hub/soil-maps-and-databases/harmonized-world-soil-database-v25/en/</a> |
| GHSHWS                     | Percent coverage Histosols   | 1000                  | <a href="https://www.fao.org/soils-portal/data-hub/soil-maps-and-databases/harmonized-world-soil-database-v24/en/">https://www.fao.org/soils-portal/data-hub/soil-maps-and-databases/harmonized-world-soil-database-v24/en/</a> |
| GGYHWS <sup>1</sup>        | Percent coverage Gypsisols   | 1000                  | <a href="https://www.fao.org/soils-portal/data-hub/soil-maps-and-databases/harmonized-world-soil-database-v23/en/">https://www.fao.org/soils-portal/data-hub/soil-maps-and-databases/harmonized-world-soil-database-v23/en/</a> |
| GGLHWS                     | Percent coverage Gleysols    | 1000                  | <a href="https://www.fao.org/soils-portal/data-hub/soil-maps-and-databases/harmonized-world-soil-database-v22/en/">https://www.fao.org/soils-portal/data-hub/soil-maps-and-databases/harmonized-world-soil-database-v22/en/</a> |
| GFRHWS                     | Percent coverage Ferralsols  | 1000                  | <a href="https://www.fao.org/soils-portal/data-hub/soil-maps-and-databases/harmonized-world-soil-database-v20/en/">https://www.fao.org/soils-portal/data-hub/soil-maps-and-databases/harmonized-world-soil-database-v20/en/</a> |
| GFLHWS                     | Percent coverage Fluvisols   | 1000                  | <a href="https://www.fao.org/soils-portal/data-hub/soil-maps-and-databases/harmonized-world-soil-database-v21/en/">https://www.fao.org/soils-portal/data-hub/soil-maps-and-databases/harmonized-world-soil-database-v21/en/</a> |
| GCRHWS                     | Percent coverage Cryosols    | 1000                  | <a href="https://www.fao.org/soils-portal/data-hub/soil-maps-and-databases/harmonized-world-soil-database-v19/en/">https://www.fao.org/soils-portal/data-hub/soil-maps-and-databases/harmonized-world-soil-database-v19/en/</a> |
| GCMHWS <sup>1</sup>        | Percent coverage Cambisols   | 1000                  | <a href="https://www.fao.org/soils-portal/data-hub/soil-maps-and-databases/harmonized-world-soil-database-v17/en/">https://www.fao.org/soils-portal/data-hub/soil-maps-and-databases/harmonized-world-soil-database-v17/en/</a> |



| <b>Factors definitions</b> | <b>Description</b>                         | <b>Resolution (m)</b> | <b>Source data set</b>                                                                                                                                                                                                          |
|----------------------------|--------------------------------------------|-----------------------|---------------------------------------------------------------------------------------------------------------------------------------------------------------------------------------------------------------------------------|
| GCLHWS                     | Percent coverage Calcisols                 | 1000                  | <a href="https://www.fao.org/soils-portal/data-hub/soil-maps-and-databases/harmonized-world-soil-database-v16/en/">https://www.fao.org/soils-portal/data-hub/soil-maps-and-databases/harmonized-world-soil-database-v16/en/</a> |
| GCHHWS                     | Percent coverage Chernozems                | 1000                  | <a href="https://www.fao.org/soils-portal/data-hub/soil-maps-and-databases/harmonized-world-soil-database-v18/en/">https://www.fao.org/soils-portal/data-hub/soil-maps-and-databases/harmonized-world-soil-database-v18/en/</a> |
| GATHWS                     | Percent coverage Anthrosols                | 1000                  | <a href="https://www.fao.org/soils-portal/data-hub/soil-maps-and-databases/harmonized-world-soil-database-v36/en/">https://www.fao.org/soils-portal/data-hub/soil-maps-and-databases/harmonized-world-soil-database-v36/en/</a> |
| GARHWS                     | Percent coverage Arenosols                 | 1000                  | <a href="https://www.fao.org/soils-portal/data-hub/soil-maps-and-databases/harmonized-world-soil-database-v15/en/">https://www.fao.org/soils-portal/data-hub/soil-maps-and-databases/harmonized-world-soil-database-v15/en/</a> |
| GANHWS                     | Percent coverage Andosols                  | 1000                  | <a href="https://www.fao.org/soils-portal/data-hub/soil-maps-and-databases/harmonized-world-soil-database-v14/en/">https://www.fao.org/soils-portal/data-hub/soil-maps-and-databases/harmonized-world-soil-database-v14/en/</a> |
| GALHWS                     | Percent coverage Alisols                   | 1000                  | <a href="https://www.fao.org/soils-portal/data-hub/soil-maps-and-databases/harmonized-world-soil-database-v35/en/">https://www.fao.org/soils-portal/data-hub/soil-maps-and-databases/harmonized-world-soil-database-v35/en/</a> |
| GACHWS                     | Percent coverage Acrisols                  | 1000                  | <a href="https://www.fao.org/soils-portal/data-hub/soil-maps-and-databases/harmonized-world-soil-database-v12/en/">https://www.fao.org/soils-portal/data-hub/soil-maps-and-databases/harmonized-world-soil-database-v12/en/</a> |
| GABHWS                     | Percent coverage Albeluvisols              | 1000                  | <a href="https://www.fao.org/soils-portal/data-hub/soil-maps-and-databases/harmonized-world-soil-database-v13/en/">https://www.fao.org/soils-portal/data-hub/soil-maps-and-databases/harmonized-world-soil-database-v13/en/</a> |
| BDTICM <sup>1</sup>        | Depth to bedrock of China                  | 90                    | <a href="http://globalchange.bnu.edu.cn/research/cdtb.jsp">http://globalchange.bnu.edu.cn/research/cdtb.jsp</a>                                                                                                                 |
| <b>Climate (36)</b>        |                                            |                       |                                                                                                                                                                                                                                 |
| TX6MOD <sup>1</sup>        | Mean Long-term Surface Temperature Oct/Nov | 1000                  | <a href="https://modis.gsfc.nasa.gov">https://modis.gsfc.nasa.gov</a>                                                                                                                                                           |
| TX5MOD                     | Mean Long-term Surface Temperature Aug/Sep | 1000                  | <a href="https://modis.gsfc.nasa.gov">https://modis.gsfc.nasa.gov</a>                                                                                                                                                           |

| <b>Factors definitions</b> | <b>Description</b>                                     | <b>Resolution (m)</b> | <b>Source data set</b>                                                |
|----------------------------|--------------------------------------------------------|-----------------------|-----------------------------------------------------------------------|
| TX4MOD                     | Mean Long-term Surface Temperature Jun/Jul             | 1000                  | <a href="https://modis.gsfc.nasa.gov">https://modis.gsfc.nasa.gov</a> |
| TX3MOD                     | Mean Long-term Surface Temperature Apr/May             | 1000                  | <a href="https://modis.gsfc.nasa.gov">https://modis.gsfc.nasa.gov</a> |
| TX2MOD                     | Mean Long-term Surface Temperature Feb/Mar             | 1000                  | <a href="https://modis.gsfc.nasa.gov">https://modis.gsfc.nasa.gov</a> |
| TX1MOD <sup>1</sup>        | Mean value of the day-time LST                         | 1000                  | <a href="https://modis.gsfc.nasa.gov">https://modis.gsfc.nasa.gov</a> |
| TNSMOD <sup>1</sup>        | Standard deviation Long-term night surface temperature | 1000                  | <a href="https://modis.gsfc.nasa.gov">https://modis.gsfc.nasa.gov</a> |
| TNMMOD                     | Mean value Long-term night surface temperature         | 1000                  | <a href="https://modis.gsfc.nasa.gov">https://modis.gsfc.nasa.gov</a> |
| TNLMOD                     | Minimum Long-term surface temperature                  | 1000                  | <a href="https://modis.gsfc.nasa.gov">https://modis.gsfc.nasa.gov</a> |
| TNHMOD <sup>1</sup>        | Maximum Long-term night surface temperature            | 1000                  | <a href="https://modis.gsfc.nasa.gov">https://modis.gsfc.nasa.gov</a> |
| TDSMOD                     | Standard deviation of day-time LST                     | 1000                  | <a href="https://modis.gsfc.nasa.gov">https://modis.gsfc.nasa.gov</a> |
| TDMMOD                     | Mean Long-term day surface temperature                 | 1000                  | <a href="https://modis.gsfc.nasa.gov">https://modis.gsfc.nasa.gov</a> |
| TDLMOD                     | Minimum Long-term day surface temperature              | 1000                  | <a href="https://modis.gsfc.nasa.gov">https://modis.gsfc.nasa.gov</a> |
| TDHMOD                     | Maximum Long-term day surface temperature              | 1000                  | <a href="https://modis.gsfc.nasa.gov">https://modis.gsfc.nasa.gov</a> |
| PX4WCL                     | Long-term Precipitation Aug/Sep/Oct                    | 1000                  | <a href="https://www.worldclim.org/">https://www.worldclim.org/</a>   |
| PX3WCL                     | Long-term Precipitation of May/June/July               | 1000                  | <a href="https://www.worldclim.org/">https://www.worldclim.org/</a>   |
| PX2WCL                     | Long-term Precipitation of Feb/Mar/Apr                 | 1000                  | <a href="https://www.worldclim.org/">https://www.worldclim.org/</a>   |

| Factors definitions | Description                                           | Resolution (m) | Source data set                                                                                                                                                         |
|---------------------|-------------------------------------------------------|----------------|-------------------------------------------------------------------------------------------------------------------------------------------------------------------------|
| PX1WCL              | Long-term precipitation of Nov/Dec/Jan                | 1000           | <a href="https://www.worldclim.org/">https://www.worldclim.org/</a>                                                                                                     |
| PREGSM <sup>1</sup> | Mean monthly precipitation (annual)                   | 1000           | <a href="http://chelsa-climate.org/">http://chelsa-climate.org/</a>                                                                                                     |
| P12DWD              | Monthly precipitation for December                    | 5000           | <a href="http://chelsa-climate.org/">http://chelsa-climate.org/</a>                                                                                                     |
| P11DWD              | Mean precipitation of November                        | 1000           | <a href="http://chelsa-climate.org/">http://chelsa-climate.org/</a>                                                                                                     |
| P10DWD              | Mean precipitation of October                         | 1000           | <a href="http://chelsa-climate.org/">http://chelsa-climate.org/</a>                                                                                                     |
| P09DWD              | Mean precipitation of September                       | 1000           | <a href="http://chelsa-climate.org/">http://chelsa-climate.org/</a>                                                                                                     |
| P08DWD              | Mean precipitation of August                          | 1000           | <a href="http://chelsa-climate.org/">http://chelsa-climate.org/</a>                                                                                                     |
| P07DWD              | Mean precipitation of July                            | 1000           | <a href="http://chelsa-climate.org/">http://chelsa-climate.org/</a>                                                                                                     |
| P06DWD              | Mean precipitation of June                            | 1000           | <a href="http://chelsa-climate.org/">http://chelsa-climate.org/</a>                                                                                                     |
| P05DWD              | Mean precipitation of May                             | 1000           | <a href="http://chelsa-climate.org/">http://chelsa-climate.org/</a>                                                                                                     |
| P04DWD              | Mean precipitation of April                           | 1000           | <a href="http://chelsa-climate.org/">http://chelsa-climate.org/</a>                                                                                                     |
| P03DWD              | Mean precipitation of Mar                             | 1000           | <a href="http://chelsa-climate.org/">http://chelsa-climate.org/</a>                                                                                                     |
| P02DWD              | Monthly precipitation for February                    | 1000           | <a href="http://chelsa-climate.org/">http://chelsa-climate.org/</a>                                                                                                     |
| P01DWD <sup>1</sup> | Monthly precipitation for January                     | 1000           | <a href="http://chelsa-climate.org/">http://chelsa-climate.org/</a>                                                                                                     |
| MODCF <sup>1</sup>  | EC                                                    | 1000           | <a href="http://journals.plos.org/plosbiology/article?id=10.1371/journal.pbio.1002415">http://journals.plos.org/plosbiology/article?id=10.1371/journal.pbio.1002415</a> |
| L15IGB              | Snow and ice index                                    | 1000           | <a href="https://modis.gsfc.nasa.gov">https://modis.gsfc.nasa.gov</a>                                                                                                   |
| INSSRE <sup>1</sup> | Standard deviation Potential incoming solar radiation | 1000           | <a href="https://www.worldgrids.com">https://www.worldgrids.com</a>                                                                                                     |
| INMSRE <sup>1</sup> | Mean potential incoming solar radiation               | 1000           | <a href="https://www.worldgrids.com">https://www.worldgrids.com</a>                                                                                                     |
| G22ESA              | Permanent snow and ice                                | 1000           | <a href="http://due.esrin.esa.int/page_globcover.php">http://due.esrin.esa.int/page_globcover.php</a>                                                                   |

## Organisms (50)

| <b>Factors definitions</b> | <b>Description</b>                                                                       | <b>Resolution (m)</b> | <b>Source data set</b>                                                                                                              |
|----------------------------|------------------------------------------------------------------------------------------|-----------------------|-------------------------------------------------------------------------------------------------------------------------------------|
| B5/B7 <sup>1</sup>         | The ratio of Band 5 (near-infrared) to Band 7 (shortwave infrared 2) surface reflectance | 90                    | <a href="https://www.usgs.gov/landsat-missions/landsat-collection-2">https://www.usgs.gov/landsat-missions/landsat-collection-2</a> |
| NDVI <sup>1</sup>          | Normalized Difference Vegetation Index                                                   | 90                    | Calculated from Landsat 8 Collection 2 Level-2 (LC08C02) on the GEE platform                                                        |
| NDWI <sup>1</sup>          | Normalized Difference Water Index                                                        | 90                    | Calculated from Landsat 8 Collection 2 Level-2 (LC08C02) on the GEE platform                                                        |
| surR <sup>1</sup>          | Surface Reflectance                                                                      | 250                   | <a href="https://modis.gsfc.nasa.gov/data/dataproduct/mod09.php">https://modis.gsfc.nasa.gov/data/dataproduct/mod09.php</a>         |
| EVI                        | Enhanced Vegetation Index                                                                | 500                   | Calculated from LC08C02 on the GEE platform                                                                                         |
| SAI <sup>1</sup>           | Snow Area Index                                                                          | 500                   | Calculated from LC08C02 on the GEE platform                                                                                         |
| LAI <sup>1</sup>           | Leaf Area Index                                                                          | 90                    | Calculated from LC08C02 on the GEE platform                                                                                         |
| NPP                        | Net Primary Productivity                                                                 | 500                   | <a href="https://lpdaac.usgs.gov/products/mod17a3hgvf061/">https://lpdaac.usgs.gov/products/mod17a3hgvf061/</a>                     |
| landuse <sup>1</sup>       | Land use type                                                                            | 30                    | <a href="https://www.resdc.cn/DOI/DOI.aspx?DOIID=54">https://www.resdc.cn/DOI/DOI.aspx?DOIID=54</a>                                 |
| CanopyHeight <sup>1</sup>  | Canopy Height                                                                            | 10                    | <a href="https://doi.org/10.3929/ethz-b-000609802">https://doi.org/10.3929/ethz-b-000609802</a>                                     |
| Sentinel2B2 <sup>1</sup>   | Band2 from Sentinel2                                                                     | 90                    | Derived from Sentinel2 on the GEE platform                                                                                          |
| Sentinel2B3                | Band3 from Sentinel2                                                                     | 90                    | Derived from Sentinel2 on the GEE platform                                                                                          |
| Sentinel2B4                | Band4 from Sentinel2                                                                     | 90                    | Derived from Sentinel2 on the GEE platform                                                                                          |
| Sentinel2B8                | Band8 from Sentinel2                                                                     | 90                    | Derived from Sentinel2 on the GEE platform                                                                                          |
| Sentinel2B9                | Band9 from Sentinel2                                                                     | 90                    | Derived from Sentinel2 on the GEE platform                                                                                          |
| QA_PIXEL <sup>1</sup>      | Landsat 8 Collection 2 Level-2 Pixel Quality Band                                        | 90                    | Derived from LC08C02 on the GEE platform                                                                                            |
| QA_RADSAT                  | Radiometric Saturation Quality control                                                   | 90                    | Derived from LC08C02 on the GEE platform                                                                                            |
| SR_B4 <sup>1</sup>         | Surface Reflectance of Band4                                                             | 90                    | Derived from LC08C02 on the GEE platform                                                                                            |
| SR_B5                      | Surface Reflectance of Band5                                                             | 90                    | Derived from LC08C02 on the GEE platform                                                                                            |
| SR_B6                      | Surface Reflectance of Band6                                                             | 90                    | Derived from LC08C02 on the GEE platform                                                                                            |
| SR_B7                      | Surface Reflectance of Band7                                                             | 90                    | Derived from LC08C02 on the GEE platform                                                                                            |
| ST_ATRAN                   | Atmospheric Transmittance                                                                | 90                    | Derived from LC08C02 on the GEE platform                                                                                            |
| ST_B10                     | Band 10 Surface Temperature                                                              | 90                    | Derived from LC08C02 on the GEE platform                                                                                            |
| ST_EMSD                    | Emissivity standard deviation                                                            | 90                    | Derived from LC08C02 on the GEE platform                                                                                            |

| <b>Factors definitions</b> | <b>Description</b>                                      | <b>Resolution (m)</b> | <b>Source data set</b>                                                                                                                                    |
|----------------------------|---------------------------------------------------------|-----------------------|-----------------------------------------------------------------------------------------------------------------------------------------------------------|
| ST_TRAD                    | Thermal Radiance                                        | 90                    | Derived from LC08C02 on the GEE platform                                                                                                                  |
| ST_URAD                    | Downwelled Radiance                                     | 90                    | Derived from LC08C02 on the GEE platform                                                                                                                  |
| wc2.1_prec                 |                                                         | 1000                  |                                                                                                                                                           |
| wc2.1_srad <sup>1</sup>    | solar radiation (kJ m <sup>-2</sup> day <sup>-1</sup> ) | 1000                  | <a href="https://worldclim.org/data/worldclim21.html">https://worldclim.org/data/worldclim21.html</a>                                                     |
| wc2.1_tavg                 | average temperature (°C)                                | 1000                  | <a href="https://worldclim.org/data/worldclim21.html">https://worldclim.org/data/worldclim21.html</a>                                                     |
| wc2.1_tmax                 | maximum temperature (°C)                                | 1000                  | <a href="https://worldclim.org/data/worldclim21.html">https://worldclim.org/data/worldclim21.html</a>                                                     |
| wc2.1_tmin                 | minimum temperature (°C)                                | 1000                  | <a href="https://worldclim.org/data/worldclim21.html">https://worldclim.org/data/worldclim21.html</a>                                                     |
| wc2.1_prec                 | precipitation (mm)                                      | 1000                  | <a href="https://worldclim.org/data/worldclim21.html">https://worldclim.org/data/worldclim21.html</a>                                                     |
| wc2.1_wind <sup>1</sup>    | wind speed (m s <sup>-1</sup> )                         | 1000                  | <a href="https://worldclim.org/data/worldclim21.html">https://worldclim.org/data/worldclim21.html</a>                                                     |
| RANGE0105                  | Range of Enhanced Vegetation Index                      | 1000                  | <a href="http://onlinelibrary.wiley.com/doi/10.1111/geb.12368/abstract">http://onlinelibrary.wiley.com/doi/10.1111/geb.12368/abstract</a>                 |
| PDMGPW <sup>1</sup>        | Average population density                              | 5000                  | <a href="https://www.worldgrids.com">https://www.worldgrids.com</a>                                                                                       |
| MAX0105                    | Maximum of Enhanced Vegetation Index                    | 1000                  | <a href="http://onlinelibrary.wiley.com/doi/10.1111/geb.12367/abstract">http://onlinelibrary.wiley.com/doi/10.1111/geb.12367/abstract</a>                 |
| LCEE10                     | ESA land cover                                          | 300                   | <a href="http://maps.elie.ucl.ac.be/CCI/viewer/download/ESACCI-LC-PUG-v2.5.pdf">http://maps.elie.ucl.ac.be/CCI/viewer/download/ESACCI-LC-PUG-v2.5.pdf</a> |
| L16IGB                     | Barren or sparsely vegetated                            | 1000                  | <a href="https://modis.gsfc.nasa.gov">https://modis.gsfc.nasa.gov</a>                                                                                     |
| L14IGB                     | Cropland/natural vegetation mosaic                      | 1000                  | <a href="https://modis.gsfc.nasa.gov">https://modis.gsfc.nasa.gov</a>                                                                                     |
| L13IGB                     | Urban and built-up                                      | 1000                  | <a href="https://modis.gsfc.nasa.gov">https://modis.gsfc.nasa.gov</a>                                                                                     |
| L12IGB                     | Croplands index                                         | 1000                  | <a href="https://modis.gsfc.nasa.gov">https://modis.gsfc.nasa.gov</a>                                                                                     |
| L11IGB                     | Permanent Wetlands                                      | 1000                  | <a href="https://modis.gsfc.nasa.gov">https://modis.gsfc.nasa.gov</a>                                                                                     |
| L10IGB                     | Grasslands                                              | 1000                  | <a href="https://modis.gsfc.nasa.gov">https://modis.gsfc.nasa.gov</a>                                                                                     |
| L09IGB                     | Savannas                                                | 1000                  | <a href="https://modis.gsfc.nasa.gov">https://modis.gsfc.nasa.gov</a>                                                                                     |
| L06IGB                     | Closed shrublands                                       | 1000                  | <a href="https://modis.gsfc.nasa.gov">https://modis.gsfc.nasa.gov</a>                                                                                     |
| L05IGB                     | Mixed forests index                                     | 1000                  | <a href="https://modis.gsfc.nasa.gov">https://modis.gsfc.nasa.gov</a>                                                                                     |
| L04IGB <sup>1</sup>        | Deciduous broadleaf forest                              | 1000                  | <a href="https://modis.gsfc.nasa.gov">https://modis.gsfc.nasa.gov</a>                                                                                     |
| L03IGB                     | Deciduous needleleaf forest                             | 1000                  | <a href="https://modis.gsfc.nasa.gov">https://modis.gsfc.nasa.gov</a>                                                                                     |
| L02IGB                     | Evergreen broadleaf forest                              | 1000                  | <a href="https://modis.gsfc.nasa.gov">https://modis.gsfc.nasa.gov</a>                                                                                     |
| L01IGB                     | Evergreen needleleaf forest                             | 1000                  | <a href="https://modis.gsfc.nasa.gov">https://modis.gsfc.nasa.gov</a>                                                                                     |

| <b>Factors definitions</b> | <b>Description</b>                                                                                                      | <b>Resolution (m)</b> | <b>Source data set</b>                                                                                |
|----------------------------|-------------------------------------------------------------------------------------------------------------------------|-----------------------|-------------------------------------------------------------------------------------------------------|
| GLCJRC                     | Global Land Cover map for the year 2000                                                                                 | 1000                  | <a href="http://www.globallandcover.com/">http://www.globallandcover.com/</a>                         |
| GLCESA                     | Land Cover classes                                                                                                      | 1000                  | <a href="http://due.esrin.esa.int/page_globcover.php">http://due.esrin.esa.int/page_globcover.php</a> |
| GACGEM <sup>1</sup>        | Global accessibility map                                                                                                | 1000                  | <a href="http://globalaccessibilitymap.com/">http://globalaccessibilitymap.com/</a>                   |
| G21ESA                     | Water bodies                                                                                                            | 1000                  | <a href="http://due.esrin.esa.int/page_globcover.php">http://due.esrin.esa.int/page_globcover.php</a> |
| G20ESA                     | Bare areas                                                                                                              | 1000                  | <a href="http://due.esrin.esa.int/page_globcover.php">http://due.esrin.esa.int/page_globcover.php</a> |
| G19ESA                     | Artificial surfaces and associated areas                                                                                | 1000                  | <a href="http://due.esrin.esa.int/page_globcover.php">http://due.esrin.esa.int/page_globcover.php</a> |
| G18ESA                     | Closed to open grassland or woody vegetation on regularly flooded or waterlogged soil - Fresh, brackish or saline water | 1000                  | <a href="http://due.esrin.esa.int/page_globcover.php">http://due.esrin.esa.int/page_globcover.php</a> |
| G17ESA                     | Closed broadleaved forest or shrubland permanently flooded - Saline or brackish water                                   | 1000                  | <a href="http://due.esrin.esa.int/page_globcover.php">http://due.esrin.esa.int/page_globcover.php</a> |
| G16ESA                     | Closed to open broadleaved forest regularly flooded - Fresh or brackish water                                           | 1000                  | <a href="http://due.esrin.esa.int/page_globcover.php">http://due.esrin.esa.int/page_globcover.php</a> |
| G15ESA                     | Sparse (<15%) vegetation                                                                                                | 1000                  | <a href="http://due.esrin.esa.int/page_globcover.php">http://due.esrin.esa.int/page_globcover.php</a> |
| G14ESA                     | Closed to open shrubland                                                                                                | 1000                  | <a href="http://due.esrin.esa.int/page_globcover.php">http://due.esrin.esa.int/page_globcover.php</a> |
| G12IGB                     | Land cover types for 2012                                                                                               | 1000                  | <a href="https://modis.gsfc.nasa.gov">https://modis.gsfc.nasa.gov</a>                                 |
| G11IGB                     | Land cover types for 2011                                                                                               | 1000                  | <a href="https://modis.gsfc.nasa.gov">https://modis.gsfc.nasa.gov</a>                                 |
| G11ESA                     | Mosaic forest or shrubland / grassland                                                                                  | 1000                  | <a href="http://due.esrin.esa.int/page_globcover.php">http://due.esrin.esa.int/page_globcover.php</a> |
| G10IGB                     | Land cover types for 2010                                                                                               | 1000                  | <a href="https://modis.gsfc.nasa.gov">https://modis.gsfc.nasa.gov</a>                                 |
| G10ESA                     | Closed to open mixed broadleaved and needleleaved forest                                                                | 1000                  | <a href="http://due.esrin.esa.int/page_globcover.php">http://due.esrin.esa.int/page_globcover.php</a> |
| G09ESA                     | Open needleleaved deciduous or evergreen forest                                                                         | 1000                  | <a href="http://due.esrin.esa.int/page_globcover.php">http://due.esrin.esa.int/page_globcover.php</a> |

| <b>Factors definitions</b> | <b>Description</b>                                            | <b>Resolution (m)</b> | <b>Source data set</b>                                                                                                                                                                                  |
|----------------------------|---------------------------------------------------------------|-----------------------|---------------------------------------------------------------------------------------------------------------------------------------------------------------------------------------------------------|
| G08ESA                     | Closed needleleaved evergreen forest                          | 1000                  | <a href="http://due.esrin.esa.int/page_globcover.php">http://due.esrin.esa.int/page_globcover.php</a>                                                                                                   |
| G07ESA                     | Open broadleaved deciduous forest/woodland                    | 1000                  | <a href="http://due.esrin.esa.int/page_globcover.php">http://due.esrin.esa.int/page_globcover.php</a>                                                                                                   |
| G05ESA                     | Closed to open broadleaved evergreen or semi-deciduous forest | 1000                  | <a href="http://due.esrin.esa.int/page_globcover.php">http://due.esrin.esa.int/page_globcover.php</a>                                                                                                   |
| G04IGB                     | Land cover types for 2004                                     | 1000                  | <a href="https://modis.gsfc.nasa.gov">https://modis.gsfc.nasa.gov</a>                                                                                                                                   |
| G04ESA                     | Mosaic vegetation / cropland                                  | 1000                  | <a href="http://due.esrin.esa.int/page_globcover.php">http://due.esrin.esa.int/page_globcover.php</a>                                                                                                   |
| G03ESA                     | Mosaic cropland / vegetation                                  | 1000                  | <a href="http://due.esrin.esa.int/page_globcover.php">http://due.esrin.esa.int/page_globcover.php</a>                                                                                                   |
| G02IGB                     | Land cover types for 2002                                     | 1000                  | <a href="https://modis.gsfc.nasa.gov">https://modis.gsfc.nasa.gov</a>                                                                                                                                   |
| G02ESA                     | Rainfed croplands                                             | 1000                  | <a href="http://due.esrin.esa.int/page_globcover.php">http://due.esrin.esa.int/page_globcover.php</a>                                                                                                   |
| G01IGB                     | Land cover types for 2001                                     | 1000                  | <a href="https://modis.gsfc.nasa.gov">https://modis.gsfc.nasa.gov</a>                                                                                                                                   |
| G01ESA                     | Post-flooding or irrigated croplands (or aquatic)             | 1000                  | <a href="http://due.esrin.esa.int/page_globcover.php">http://due.esrin.esa.int/page_globcover.php</a>                                                                                                   |
| EVSMOD                     | Standard deviation MODIS Enhanced Vegetation Index            | 1000                  | <a href="https://modis.gsfc.nasa.gov">https://modis.gsfc.nasa.gov</a>                                                                                                                                   |
| EVMMOD <sup>1</sup>        | Mean MODIS Enhanced Vegetation Index                          | 1000                  | <a href="https://modis.gsfc.nasa.gov">https://modis.gsfc.nasa.gov</a>                                                                                                                                   |
| EVENNESS                   | Evenness of Enhanced Vegetation Index                         | 1000                  | <a href="http://onlinelibrary.wiley.com/doi/10.1111/geb.12366/abstract">http://onlinelibrary.wiley.com/doi/10.1111/geb.12366/abstract</a>                                                               |
| ENTROPY                    | Disorderliness of Enhanced Vegetation Index                   | 1000                  | <a href="http://onlinelibrary.wiley.com/doi/10.1111/geb.12365/abstract">http://onlinelibrary.wiley.com/doi/10.1111/geb.12365/abstract</a>                                                               |
| COVER                      | Land cover of 2010                                            | 300                   | <a href="http://www.sciencemag.org/content/342/6160/850">http://www.sciencemag.org/content/342/6160/850</a>                                                                                             |
| TERECO <sup>1</sup>        | Terrestrial Ecosystems                                        | 250                   | <a href="https://landscape12.arcgis.com/arcgis/rest/services/World_Terrestrial_Ecosystems/ImageServer">https://landscape12.arcgis.com/arcgis/rest/services/World_Terrestrial_Ecosystems/ImageServer</a> |

### **Relief (13)**

|                  |                                              |      |                                                                                                                     |
|------------------|----------------------------------------------|------|---------------------------------------------------------------------------------------------------------------------|
| L3POBI           | Physiographic landform units (SCALA project) | 1000 | <a href="https://www.worldgrids.com">https://www.worldgrids.com</a>                                                 |
| DEM <sup>1</sup> | Land surface elevation                       | 90   | <a href="https://hydro.iis.u-tokyo.ac.jp/~yamada/MERIT_DEM/">https://hydro.iis.u-tokyo.ac.jp/~yamada/MERIT_DEM/</a> |

| <b>Factors definitions</b> | <b>Description</b>                                | <b>Resolution (m)</b> | <b>Source data set</b>                                                                                              |
|----------------------------|---------------------------------------------------|-----------------------|---------------------------------------------------------------------------------------------------------------------|
| slope <sup>1</sup>         | Terrain slope                                     | 90                    | Derived from DEM                                                                                                    |
| DEM_crd                    | Local downslope Curvature                         | 90                    | <a href="http://hydro.iis.u-tokyo.ac.jp/~yamadai/MERIT_DEM/">http://hydro.iis.u-tokyo.ac.jp/~yamadai/MERIT_DEM/</a> |
| DEM_cru                    | Local upslope Curvature                           | 90                    | <a href="http://hydro.iis.u-tokyo.ac.jp/~yamadai/MERIT_DEM/">http://hydro.iis.u-tokyo.ac.jp/~yamadai/MERIT_DEM/</a> |
| DEM_crv                    | Downslope Curvature                               | 90                    | <a href="http://hydro.iis.u-tokyo.ac.jp/~yamadai/MERIT_DEM/">http://hydro.iis.u-tokyo.ac.jp/~yamadai/MERIT_DEM/</a> |
| DEM_dvm                    | Deviation from Mean Value (surface roughness) x9  | 90                    | <a href="http://hydro.iis.u-tokyo.ac.jp/~yamadai/MERIT_DEM/">http://hydro.iis.u-tokyo.ac.jp/~yamadai/MERIT_DEM/</a> |
| DEM_dvm2                   | Deviation from Mean Value (surface roughness) x13 | 90                    | <a href="http://hydro.iis.u-tokyo.ac.jp/~yamadai/MERIT_DEM/">http://hydro.iis.u-tokyo.ac.jp/~yamadai/MERIT_DEM/</a> |
| DEM_mrn                    | Melton Ruggedness Number                          | 90                    | <a href="http://hydro.iis.u-tokyo.ac.jp/~yamadai/MERIT_DEM/">http://hydro.iis.u-tokyo.ac.jp/~yamadai/MERIT_DEM/</a> |
| DEM_nopn <sup>1</sup>      | Negative Topographic Openness                     | 90                    | <a href="http://hydro.iis.u-tokyo.ac.jp/~yamadai/MERIT_DEM/">http://hydro.iis.u-tokyo.ac.jp/~yamadai/MERIT_DEM/</a> |
| DEM_popn                   | Positive Topographic Openness                     | 90                    | <a href="http://hydro.iis.u-tokyo.ac.jp/~yamadai/MERIT_DEM/">http://hydro.iis.u-tokyo.ac.jp/~yamadai/MERIT_DEM/</a> |
| DEM_prof                   | Profile Curvature                                 | 90                    | <a href="http://hydro.iis.u-tokyo.ac.jp/~yamadai/MERIT_DEM/">http://hydro.iis.u-tokyo.ac.jp/~yamadai/MERIT_DEM/</a> |
| DEM_tpi                    | Topographic Position Index                        | 90                    | <a href="http://hydro.iis.u-tokyo.ac.jp/~yamadai/MERIT_DEM/">http://hydro.iis.u-tokyo.ac.jp/~yamadai/MERIT_DEM/</a> |
| DEM_twi <sup>1</sup>       | Topographic Wetness Index                         | 90                    | <a href="http://hydro.iis.u-tokyo.ac.jp/~yamadai/MERIT_DEM/">http://hydro.iis.u-tokyo.ac.jp/~yamadai/MERIT_DEM/</a> |
| DEM_vbf                    | Multiresolution Index of Valley Bottom Flatness   | 90                    | <a href="http://hydro.iis.u-tokyo.ac.jp/~yamadai/MERIT_DEM/">http://hydro.iis.u-tokyo.ac.jp/~yamadai/MERIT_DEM/</a> |

**Parent material**

(2)

|                       |           |     |                                                                                                                                                          |
|-----------------------|-----------|-----|----------------------------------------------------------------------------------------------------------------------------------------------------------|
| RTMUSG15 <sup>1</sup> | Rock type | 250 | USGS Geosciences and Environmental Change Science Center (GECSC) based on the Global Lithological Map database v1.1 (GLiM, Hartmann and Moosdorf, 2012). |
|-----------------------|-----------|-----|----------------------------------------------------------------------------------------------------------------------------------------------------------|



| <b>Factors definitions</b> | <b>Description</b>                                     | <b>Resolution (m)</b> | <b>Source data set</b>                                                |
|----------------------------|--------------------------------------------------------|-----------------------|-----------------------------------------------------------------------|
| SEDDEP                     | Average soil and sedimentary deposit thickness         | 1000                  | <a href="https://www.ornl.gov/">https://www.ornl.gov/</a>             |
| <b>Other (2)</b>           |                                                        |                       |                                                                       |
| SMKMOD                     | MODIS LAI based soil productive area mask of the world | 5000                  | <a href="https://modis.gsfc.nasa.gov">https://modis.gsfc.nasa.gov</a> |
| LMTGSH <sup>1</sup>        | Land mask based on GSHHS                               | 1000                  | <a href="https://www.worldgrids.com">https://www.worldgrids.com</a>   |

155 <sup>1</sup>variables used in the modeling of soil organic carbon content at 0-5 cm depth interval.

**Table S2. Tuned model parameters for each soil property considered at 0-5 cm depth interval. See Table 1 for abbreviations and units of the soil properties considered.**

| Property | Number of covariates | mtry | nodesize |
|----------|----------------------|------|----------|
| pH       | 32                   | 9    | 10       |
| Sand     | 27                   | 10   | 8        |
| Silt     | 27                   | 10   | 8        |
| Clay     | 27                   | 10   | 9        |
| BD       | 25                   | 11   | 10       |
| OC       | 26                   | 9    | 10       |
| Gravel   | 25                   | 12   | 8        |
| AN       | 29                   | 17   | 13       |
| TN       | 26                   | 16   | 10       |
| CEC      | 25                   | 9    | 10       |
| Porosity | 29                   | 11   | 15       |
| TK       | 41                   | 17   | 12       |
| TP       | 38                   | 11   | 15       |
| AK       | 43                   | 17   | 11       |
| AP       | 42                   | 19   | 12       |
| R (Wet)  | 36                   | 12   | 13       |
| G (Wet)  | 35                   | 11   | 12       |
| B (Wet)  | 35                   | 11   | 13       |
| R (Dry)  | 33                   | 12   | 13       |
| G (Dry)  | 33                   | 12   | 12       |
| B (Dry)  | 33                   | 10   | 13       |

160 **Table S3. Statistical description of soil properties at six depth intervals. Refer to Table 1 for the abbreviations and units of the soil properties interested.**

| Depth interval (cm) | Number | Max    | Min  | Mean  | SD    | CV   | Skewness | Kurtosis |
|---------------------|--------|--------|------|-------|-------|------|----------|----------|
| <b>pH</b>           |        |        |      |       |       |      |          |          |
| 0-5                 | 9623   | 10.59  | 2.64 | 7.12  | 1.28  | 0.18 | -0.48    | -0.71    |
| 5-15                | 9632   | 10.53  | 2.66 | 7.14  | 1.27  | 0.18 | -0.49    | -0.71    |
| 15-30               | 9596   | 10.61  | 2.76 | 7.21  | 1.25  | 0.17 | -0.54    | -0.64    |
| 30-60               | 9288   | 10.50  | 2.99 | 7.28  | 1.25  | 0.17 | -0.61    | -0.56    |
| 60-100              | 7711   | 10.36  | 2.97 | 7.33  | 1.26  | 0.17 | -0.66    | -0.56    |
| 100-200             | 2584   | 10.28  | 2.94 | 7.61  | 1.23  | 0.16 | -1.02    | 0.15     |
| <b>sand</b>         |        |        |      |       |       |      |          |          |
| 0-5                 | 8743   | 102.63 | 0.00 | 40.26 | 21.18 | 0.53 | 0.36     | -0.51    |
| 5-15                | 8152   | 99.99  | 0.00 | 40.12 | 21.01 | 0.52 | 0.30     | -0.56    |
| 15-30               | 8122   | 99.99  | 0.02 | 39.23 | 21.13 | 0.54 | 0.36     | -0.51    |
| 30-60               | 7844   | 101.84 | 0.02 | 38.70 | 22.03 | 0.57 | 0.40     | -0.57    |
| 60-100              | 6389   | 101.33 | 0.00 | 37.93 | 22.88 | 0.60 | 0.47     | -0.56    |
| 100-200             | 2127   | 101.82 | 0.22 | 37.01 | 23.18 | 0.63 | 0.62     | -0.33    |
| <b>silt</b>         |        |        |      |       |       |      |          |          |
| 0-5                 | 8926   | 96.45  | 0.00 | 40.60 | 15.88 | 0.39 | -0.07    | -0.20    |
| 5-15                | 8324   | 95.23  | 0.00 | 40.18 | 15.34 | 0.38 | -0.02    | -0.13    |
| 15-30               | 8300   | 92.53  | 0.00 | 39.90 | 15.29 | 0.38 | -0.05    | -0.19    |
| 30-60               | 8018   | 97.19  | 0.00 | 39.36 | 15.73 | 0.40 | -0.01    | -0.21    |
| 60-100              | 6562   | 102.40 | 0.00 | 39.52 | 16.38 | 0.41 | 0.01     | -0.16    |
| 100-200             | 2207   | 100.57 | 0.00 | 41.14 | 17.74 | 0.43 | -0.08    | -0.27    |
| <b>clay</b>         |        |        |      |       |       |      |          |          |
| 0-5                 | 9142   | 100.00 | 0.04 | 19.23 | 11.01 | 0.57 | 1.06     | 1.70     |
| 5-15                | 8539   | 100.00 | 0.08 | 19.70 | 11.20 | 0.57 | 1.02     | 1.44     |
| 15-30               | 8509   | 100.00 | 0.03 | 20.91 | 11.95 | 0.57 | 1.01     | 1.35     |
| 30-60               | 8225   | 100.00 | 0.00 | 22.02 | 13.02 | 0.59 | 0.96     | 1.20     |
| 60-100              | 6748   | 100.00 | 0.00 | 22.79 | 13.78 | 0.60 | 0.90     | 0.92     |
| 100-200             | 2302   | 84.67  | 0.04 | 22.16 | 13.35 | 0.60 | 0.96     | 1.22     |
| <b>BD</b>           |        |        |      |       |       |      |          |          |

| Depth interval (cm) | Number | Max     | Min  | Mean   | SD     | CV   | Skewness | Kurtosis |
|---------------------|--------|---------|------|--------|--------|------|----------|----------|
| 0-5                 | 1531   | 2.21    | 0.14 | 1.24   | 0.20   | 0.16 | -0.69    | 2.84     |
| 5-15                | 1556   | 2.18    | 0.18 | 1.26   | 0.19   | 0.15 | -0.80    | 2.97     |
| 15-30               | 1551   | 2.12    | 0.18 | 1.34   | 0.19   | 0.14 | -1.10    | 3.47     |
| 30-60               | 1362   | 2.10    | 0.34 | 1.40   | 0.19   | 0.13 | -1.05    | 3.52     |
| 60-100              | 955    | 2.60    | 0.26 | 1.43   | 0.19   | 0.13 | -0.94    | 4.27     |
| 100-200             | 331    | 2.13    | 0.54 | 1.44   | 0.19   | 0.13 | -0.72    | 4.48     |
| <b>OC</b>           |        |         |      |        |        |      |          |          |
| 0-5                 | 9758   | 41.99   | 0.00 | 2.26   | 3.13   | 1.39 | 4.67     | 30.98    |
| 5-15                | 9164   | 61.83   | 0.00 | 2.03   | 2.78   | 1.37 | 5.67     | 55.93    |
| 15-30               | 9147   | 52.10   | 0.00 | 1.45   | 2.12   | 1.47 | 7.93     | 105.75   |
| 30-60               | 8811   | 43.07   | 0.00 | 0.97   | 1.72   | 1.77 | 10.57    | 165.14   |
| 60-100              | 7156   | 47.56   | 0.00 | 0.70   | 1.55   | 2.20 | 13.90    | 266.53   |
| 100-200             | 2306   | 45.22   | 0.00 | 0.54   | 1.83   | 3.35 | 15.04    | 271.28   |
| <b>gravel</b>       |        |         |      |        |        |      |          |          |
| 0-5                 | 1994   | 97.42   | 0.00 | 20.10  | 18.25  | 0.91 | 1.14     | 0.69     |
| 5-15                | 2041   | 95.00   | 0.00 | 20.42  | 18.27  | 0.89 | 1.10     | 0.60     |
| 15-30               | 2016   | 95.00   | 0.00 | 22.99  | 19.86  | 0.86 | 0.95     | 0.18     |
| 30-60               | 1911   | 95.33   | 0.00 | 25.64  | 21.19  | 0.83 | 0.78     | -0.25    |
| 60-100              | 1288   | 94.11   | 0.00 | 26.15  | 21.25  | 0.81 | 0.73     | -0.36    |
| 100-200             | 163    | 87.90   | 0.02 | 22.68  | 21.21  | 0.93 | 1.10     | 0.53     |
| <b>AN</b>           |        |         |      |        |        |      |          |          |
| 0-5                 | 3447   | 1295.31 | 0.90 | 145.04 | 142.00 | 0.98 | 2.71     | 9.75     |
| 5-15                | 3447   | 1279.89 | 0.95 | 132.51 | 124.07 | 0.94 | 2.82     | 11.79    |
| 15-30               | 3410   | 1326.79 | 1.12 | 99.77  | 96.81  | 0.97 | 4.04     | 28.29    |
| 30-60               | 3151   | 1425.23 | 0.65 | 68.43  | 77.99  | 1.14 | 6.36     | 67.66    |
| 60-100              | 2270   | 1010.77 | 0.62 | 51.85  | 58.11  | 1.12 | 6.48     | 73.97    |
| 100-200             | 516    | 1043.52 | 0.62 | 41.87  | 64.90  | 1.55 | 9.69     | 127.43   |
| <b>TN</b>           |        |         |      |        |        |      |          |          |
| 0-5                 | 9446   | 2.46    | 0.00 | 0.19   | 0.20   | 1.09 | 3.67     | 19.26    |
| 5-15                | 9239   | 2.46    | 0.00 | 0.17   | 0.18   | 1.06 | 4.01     | 24.93    |
| 15-30               | 9219   | 2.46    | 0.00 | 0.13   | 0.14   | 1.09 | 5.58     | 53.87    |

| Depth interval (cm) | Number | Max    | Min   | Mean  | SD    | CV   | Skewness | Kurtosis |
|---------------------|--------|--------|-------|-------|-------|------|----------|----------|
| 30-60               | 8816   | 2.49   | 0.00  | 0.09  | 0.11  | 1.24 | 8.26     | 111.67   |
| 60-100              | 7037   | 2.46   | 0.00  | 0.07  | 0.10  | 1.38 | 9.57     | 142.33   |
| 100-200             | 2219   | 1.79   | 0.00  | 0.05  | 0.09  | 1.69 | 11.89    | 179.87   |
| <b>CEC</b>          |        |        |       |       |       |      |          |          |
| 0-5                 | 6624   | 123.89 | 0.16  | 14.94 | 10.65 | 0.71 | 2.57     | 11.74    |
| 5-15                | 6627   | 124.86 | 0.52  | 14.53 | 9.86  | 0.68 | 2.47     | 11.76    |
| 15-30               | 6595   | 125.40 | 0.29  | 13.59 | 8.96  | 0.66 | 2.62     | 14.92    |
| 30-60               | 6213   | 116.03 | 0.22  | 12.71 | 8.35  | 0.66 | 2.27     | 11.12    |
| 60-100              | 4809   | 105.11 | 0.34  | 12.21 | 8.29  | 0.68 | 2.54     | 14.79    |
| 100-200             | 1539   | 102.90 | 0.28  | 12.36 | 8.00  | 0.65 | 2.14     | 13.08    |
| <b>TP</b>           |        |        |       |       |       |      |          |          |
| 0-5                 | 8229   | 12.43  | 0.00  | 0.08  | 0.17  | 1.98 | 54.57    | 3808.42  |
| 5-15                | 8229   | 12.61  | 0.00  | 0.08  | 0.17  | 2.00 | 56.58    | 4081.97  |
| 15-30               | 8193   | 14.58  | 0.00  | 0.08  | 0.18  | 2.34 | 68.24    | 5468.62  |
| 30-60               | 7822   | 15.93  | 0.00  | 0.07  | 0.19  | 2.73 | 75.01    | 6237.73  |
| 60-100              | 6160   | 16.12  | 0.00  | 0.07  | 0.21  | 3.21 | 68.67    | 5123.50  |
| 100-200             | 1882   | 0.66   | 0.00  | 0.06  | 0.05  | 0.79 | 3.55     | 24.01    |
| <b>porosity</b>     |        |        |       |       |       |      |          |          |
| 0-5                 | 734    | 74.86  | 32.11 | 52.14 | 6.49  | 0.12 | 0.35     | 0.76     |
| 5-15                | 734    | 74.15  | 30.57 | 51.41 | 6.15  | 0.12 | 0.41     | 0.80     |
| 15-30               | 732    | 78.23  | 28.42 | 49.01 | 6.07  | 0.12 | 0.81     | 1.89     |
| 30-60               | 659    | 77.09  | 22.44 | 47.40 | 6.14  | 0.13 | 0.83     | 2.61     |
| 60-100              | 469    | 78.85  | 22.91 | 46.60 | 6.02  | 0.13 | 0.69     | 2.87     |
| 100-200             | 196    | 79.42  | 23.72 | 45.92 | 6.64  | 0.14 | 0.52     | 4.08     |
| <b>TK</b>           |        |        |       |       |       |      |          |          |
| 0-5                 | 6729   | 5.24   | 0.02  | 1.95  | 0.67  | 0.34 | 0.05     | 1.17     |
| 5-15                | 6728   | 5.24   | 0.03  | 1.95  | 0.66  | 0.34 | 0.04     | 1.16     |
| 15-30               | 6698   | 5.23   | 0.03  | 1.95  | 0.66  | 0.34 | 0.03     | 1.11     |
| 30-60               | 6360   | 5.02   | 0.02  | 1.95  | 0.68  | 0.35 | 0.03     | 1.02     |
| 60-100              | 4978   | 6.16   | 0.00  | 1.93  | 0.70  | 0.36 | 0.09     | 1.06     |
| 100-200             | 1344   | 5.13   | 0.00  | 1.93  | 0.63  | 0.32 | 0.18     | 1.99     |

| Depth interval (cm) | Number | Max     | Min    | Mean   | SD     | CV    | Skewness | Kurtosis |
|---------------------|--------|---------|--------|--------|--------|-------|----------|----------|
| <b>AK</b>           |        |         |        |        |        |       |          |          |
| 0-5                 | 4984   | 6405.52 | 1.00   | 153.36 | 183.92 | 1.20  | 16.29    | 490.56   |
| 5-15                | 4990   | 7440.15 | 0.92   | 143.03 | 170.30 | 1.19  | 19.89    | 747.11   |
| 15-30               | 4951   | 7803.84 | 1.00   | 116.92 | 151.66 | 1.30  | 28.23    | 1350.57  |
| 30-60               | 4605   | 6986.45 | 1.00   | 99.69  | 139.19 | 1.40  | 28.28    | 1318.20  |
| 60-100              | 3494   | 6047.12 | 0.98   | 94.69  | 140.06 | 1.48  | 24.32    | 954.11   |
| 100-200             | 937    | 861.81  | 1.75   | 99.71  | 84.75  | 84.75 | 0.85     | 3.43     |
| <b>AP</b>           |        |         |        |        |        |       |          |          |
| 0-5                 | 4932   | 398.99  | 0.10   | 9.41   | 13.48  | 1.43  | 10.02    | 208.71   |
| 5-15                | 4934   | 443.53  | 0.10   | 8.76   | 13.16  | 1.50  | 12.68    | 323.74   |
| 15-30               | 4889   | 587.27  | 0.10   | 6.39   | 11.85  | 1.85  | 26.22    | 1193.62  |
| 30-60               | 4485   | 185.08  | 0.02   | 4.87   | 7.74   | 1.59  | 8.59     | 125.29   |
| 60-100              | 3351   | 235.83  | 0.03   | 4.73   | 8.80   | 1.86  | 11.63    | 227.95   |
| 100-200             | 882    | 74.62   | 0.06   | 4.53   | 7.11   | 1.57  | 4.89     | 33.14    |
| <b>R (wet)</b>      |        |         |        |        |        |       |          |          |
| 0-5                 | 2889   | 265.92  | 40.00  | 139.34 | 38.89  | 0.28  | -0.06    | -0.14    |
| 5-15                | 2940   | 259.30  | 23.80  | 140.47 | 37.19  | 0.26  | -0.08    | -0.16    |
| 15-30               | 2929   | 256.22  | 26.33  | 147.65 | 34.28  | 0.23  | -0.16    | 0.07     |
| 30-60               | 2808   | 256.67  | 15.27  | 156.04 | 34.23  | 0.22  | -0.23    | 0.39     |
| 60-100              | 2365   | 261.15  | 161.39 | 34.83  | 34.83  | 0.22  | -0.20    | 0.28     |
| 100-200             | 801    | 261.06  | 53.26  | 167.02 | 34.08  | 0.20  | -0.19    | 0.04     |
| <b>G (wet)</b>      |        |         |        |        |        |       |          |          |
| 0-5                 | 2889   | 266.35  | 21.00  | 117.25 | 37.87  | 0.32  | 0.07     | -0.12    |
| 5-15                | 2940   | 255.00  | 21.00  | 117.78 | 36.20  | 0.31  | 0.05     | -0.23    |
| 15-30               | 2929   | 255.00  | 21.00  | 122.59 | 33.20  | 0.27  | 0.02     | -0.17    |
| 30-60               | 2809   | 255.00  | 18.09  | 128.73 | 33.25  | 0.26  | 0.03     | -0.06    |
| 60-100              | 2365   | 257.89  | 19.81  | 133.05 | 33.87  | 0.25  | 0.01     | -0.29    |
| 100-200             | 801    | 206.33  | 40.92  | 135.84 | 32.06  | 0.24  | -0.14    | -0.41    |
| <b>B (wet)</b>      |        |         |        |        |        |       |          |          |
| 0-5                 | 2887   | 269.35  | 0.05   | 92.40  | 37.61  | 0.41  | 0.10     | 0.02     |
| 5-15                | 2939   | 255.00  | 0.02   | 92.17  | 36.03  | 0.39  | 0.06     | -0.20    |

| Depth interval (cm) | Number | Max    | Min   | Mean   | SD    | CV   | Skewness | Kurtosis |
|---------------------|--------|--------|-------|--------|-------|------|----------|----------|
| 15-30               | 2828   | 255.00 | 7.84  | 93.58  | 34.48 | 0.39 | -0.02    | -0.49    |
| 30-60               | 2808   | 255.00 | 0.51  | 96.13  | 36.14 | 0.38 | -0.00    | -0.32    |
| 60-100              | 2364   | 258.83 | 4.36  | 98.33  | 38.14 | 0.39 | -0.06    | -0.45    |
| 100-200             | 800    | 198.68 | 10.25 | 98.26  | 36.66 | 0.37 | -0.21    | -0.58    |
| <b>R (dry)</b>      |        |        |       |        |       |      |          |          |
| 0-5                 | 1738   | 265.58 | 8.00  | 145.12 | 36.70 | 0.25 | -0.14    | 0.05     |
| 5-15                | 1769   | 256.63 | 8.00  | 145.90 | 34.62 | 0.24 | -0.16    | 0.07     |
| 15-30               | 1757   | 236.48 | 8.00  | 151.26 | 32.21 | 0.21 | -0.17    | 0.19     |
| 30-60               | 1714   | 251.16 | 8.00  | 158.01 | 33.28 | 0.21 | -0.20    | 0.38     |
| 60-100              | 1502   | 257.89 | 8.00  | 163.92 | 33.97 | 0.21 | -0.34    | 0.57     |
| 100-200             | 665    | 263.26 | 8.00  | 170.09 | 33.48 | 0.20 | -0.38    | 0.80     |
| <b>G (dry)</b>      |        |        |       |        |       |      |          |          |
| 0-5                 | 1738   | 267.41 | 8.00  | 120.71 | 36.16 | 0.30 | 0.12     | 0.11     |
| 5-15                | 1769   | 256.95 | 8.00  | 121.01 | 34.17 | 0.28 | 0.10     | 0.03     |
| 15-30               | 1757   | 219.37 | 8.00  | 124.52 | 31.78 | 0.26 | 0.09     | -0.17    |
| 30-60               | 1714   | 250.37 | 8.00  | 128.70 | 32.81 | 0.25 | 0.06     | -0.22    |
| 60-100              | 1502   | 258.48 | 8.00  | 133.33 | 34.06 | 0.26 | -0.03    | -0.31    |
| 100-200             | 665    | 267.38 | 8.00  | 133.33 | 34.06 | 0.26 | -0.03    | -0.31    |
| <b>B (dry)</b>      |        |        |       |        |       |      |          |          |
| 0-5                 | 1732   | 269.53 | 8.00  | 94.91  | 37.06 | 0.39 | 0.24     | 0.34     |
| 5-15                | 1768   | 257.30 | 5.61  | 94.34  | 35.32 | 0.37 | 0.17     | 0.08     |
| 15-30               | 1756   | 213.47 | 8.00  | 95.35  | 33.29 | 0.35 | 0.06     | -0.42    |
| 30-60               | 1713   | 249.42 | 8.00  | 96.26  | 34.41 | 0.37 | 0.05     | -0.42    |
| 60-100              | 1502   | 259.21 | 8.00  | 99.22  | 38.33 | 0.39 | 0.04     | -0.39    |
| 100-200             | 668    | 268.45 | 8.00  | 103.70 | 38.75 | 0.37 | -0.07    | -0.26    |

CV: coefficient of variation; SD: standard deviation;

165 **Table S4. Predictive performance of CSDLv2, CSDLv1, SoilGrids 2.0, and HWSO 2.0. Twenty repeats of validation with testing soil profiles for CSDLv2, and validation using all soil profiles for other datasets. See Table 1 for the abbreviations and units of the soil properties interested.**

| Property | Depth interval | CSDLv2 |       |       | CSDLv1 |        |        | SoilGrids 2.0 |       |       | HWSO 2.0 |       |        |
|----------|----------------|--------|-------|-------|--------|--------|--------|---------------|-------|-------|----------|-------|--------|
|          |                | MEC    | RMSE  | ME    | MEC    | RMSE   | ME     | MEC           | RMSE  | ME    | MEC      | RMSE  | ME     |
| OC       | 0-5            | 0.57   | 2.04  | 0.03  | 0.16   | 2.86   | -0.51  | 0.24          | 2.72  | 1.11  | 0.04     | 3.38  | -0.50  |
|          | 5-15           | 0.56   | 1.82  | 0.02  | 0.13   | 2.60   | -0.46  | 0.46          | 2.05  | 0.08  | 0.03     | 3.05  | -1.15  |
|          | 15-30          | 0.45   | 1.51  | 0.01  | 0.12   | 2.11   | -0.36  | 0.40          | 1.64  | 0.03  | 0.04     | 2.29  | -0.82  |
|          | 30-60          | 0.40   | 1.28  | 0.01  | 0.10   | 1.76   | -0.26  | 0.34          | 1.38  | 0.01  | 0.02     | 1.83  | -0.51  |
|          | 60-100         | 0.25   | 1.30  | 0.01  | 0.08   | 1.64   | -0.23  | 0.20          | 0.54  | -0.01 | 0.03     | 1.61  | -0.36  |
|          | 100-200        | 0.23   | 0.41  | 0.03  | 0.07   | 1.82   | -0.32  | 0.13          | 1.70  | 0.04  | 0.03     | 1.58  | -0.21  |
| gravel   | 0-5            | 0.49   | 12.97 | 0.06  | 0.13   | 19.43  | -6.31  | 0.45          | 13.46 | 0.36  | 0.04     | 21.12 | -7.27  |
|          | 5-15           | 0.51   | 12.72 | 0.11  | 0.06   | 18.82  | -5.63  | 0.48          | 13.07 | 0.55  | 0.03     | 21.63 | -6.47  |
|          | 15-30          | 0.52   | 13.68 | 0.09  | 0.09   | 20.77  | -5.23  | 0.49          | 14.18 | -0.13 | 0.03     | 23.17 | -9.60  |
|          | 30-60          | 0.50   | 14.85 | 0.09  | 0.06   | 21.83  | 5.35   | 0.47          | 15.37 | -0.06 | 0.03     | 23.99 | -10.69 |
|          | 60-100         | 0.47   | 15.25 | 0.14  | 0.05   | 22.45  | 2.91   | 0.43          | 15.86 | -0.07 | 0.03     | 24.47 | -8.93  |
|          | 100-200        | 0.35   | 14.84 | 0.03  | 0.04   | 23.34  | -3.97  | 0.30          | 16.60 | 2.66  | 0.05     | 23.43 | -8.13  |
| AN       | 0-5            | 0.53   | 96.32 | 1.48  | 0.14   | 131.81 | -11.55 | -             | -     | -     | -        | -     | -      |
|          | 5-15           | 0.52   | 84.08 | 1.28  | 0.14   | 114.91 | -10.35 | -             | -     | -     | -        | -     | -      |
|          | 15-30          | 0.37   | 73.85 | 0.71  | 0.09   | 92.90  | -6.05  | -             | -     | -     | -        | -     | -      |
|          | 30-60          | 0.33   | 62.78 | 0.96  | 0.02   | 78.46  | -3.38  | -             | -     | -     | -        | -     | -      |
|          | 60-100         | 0.25   | 48.92 | 0.74  | 0.02   | 59.46  | -6.55  | -             | -     | -     | -        | -     | -      |
|          | 100-200        | 0.24   | 20.41 | -0.11 | 0.01   | 98.61  | -8.46  | -             | -     | -     | -        | -     | -      |
| TN       | 0-5            | 0.44   | 0.15  | 0.00  | 0.19   | 0.18   | -0.03  | 0.14          | 0.23  | 0.13  | 0.04     | 2.46  | -0.79  |
|          | 5-15           | 0.40   | 0.14  | 0.00  | 0.17   | 0.17   | -0.03  | 0.31          | 0.15  | 0.01  | 0.02     | 2.50  | -1.46  |
|          | 15-30          | 0.28   | 0.12  | 0.00  | 0.08   | 0.14   | -0.03  | 0.21          | 0.13  | 0.01  | 0.02     | 2.27  | -1.48  |
|          | 30-60          | 0.18   | 0.06  | 0.00  | 0.01   | 0.02   | -0.02  | 0.13          | 0.11  | 0.00  | 0.02     | 2.33  | -1.44  |
|          | 60-100         | 0.25   | 0.04  | 0.00  | 0.01   | 0.10   | -0.02  | 0.08          | 0.09  | -0.00 | 0.03     | 2.45  | -1.48  |
|          | 100-200        | 0.20   | 0.02  | 0.00  | 0.01   | 0.09   | -0.03  | 0.02          | 0.09  | 0.00  | 0.02     | 2.92  | -1.56  |
| CEC      | 0-5            | 0.34   | 8.49  | 0.16  | 0.07   | 10.23  | -1.27  | 0.17          | 11.55 | 5.58  | 0.02     | 12.37 | 1.73   |
|          | 5-15           | 0.33   | 7.90  | 0.15  | 0.06   | 9.51   | -1.22  | 0.16          | 10.27 | 4.01  | 0.02     | 11.02 | 0.69   |
|          | 15-30          | 0.28   | 7.44  | 0.13  | 0.04   | 9.10   | -1.17  | 0.14          | 9.91  | 4.50  | 0.03     | 9.23  | 0.52   |
|          | 30-60          | 0.27   | 7.01  | 0.12  | 0.03   | 8.47   | -1.23  | 0.13          | 9.69  | 4.80  | 0.03     | 8.87  | 0.58   |
|          | 60-100         | 0.24   | 7.05  | 0.14  | 0.05   | 8.79   | 1.30   | 0.10          | 9.73  | 4.97  | 0.02     | 8.86  | 0.73   |



|          |         |      |        |       |      |        |        |      |      |      |      |      |      |
|----------|---------|------|--------|-------|------|--------|--------|------|------|------|------|------|------|
|          | 100-200 | 0.25 | 6.86   | 0.06  | 0.08 | 8.91   | 1.42   | 0.11 | 9.70 | 4.86 | 0.02 | 8.45 | 1.09 |
| TP       | 0-5     | 0.29 | 0.05   | 0.00  | 0.01 | 0.17   | -0.02  | -    | -    | -    | -    | -    | -    |
|          | 5-15    | 0.30 | 0.05   | 0.00  | 0.01 | 0.15   | -0.01  | -    | -    | -    | -    | -    | -    |
|          | 15-30   | 0.29 | 0.05   | 0.00  | 0.02 | 0.15   | -0.02  | -    | -    | -    | -    | -    | -    |
|          | 30-60   | 0.25 | 0.05   | 0.00  | 0.01 | 0.19   | -0.02  | -    | -    | -    | -    | -    | -    |
|          | 60-100  | 0.23 | 0.05   | 0.00  | 0.02 | 0.12   | -0.02  | -    | -    | -    | -    | -    | -    |
|          | 100-200 | 0.23 | 0.04   | 0.00  | 0.01 | 0.07   | -0.04  | -    | -    | -    | -    | -    | -    |
| porosity | 0-5     | 0.28 | 5.47   | -0.02 | 0.03 | 6.48   | -0.03  | -    | -    | -    | -    | -    | -    |
|          | 5-15    | 0.27 | 5.22   | -0.03 | 0.01 | 6.11   | -0.36  | -    | -    | -    | -    | -    | -    |
|          | 15-30   | 0.23 | 5.02   | -0.00 | 0.02 | 6.01   | -0.31  | -    | -    | -    | -    | -    | -    |
|          | 30-60   | 0.20 | 3.95   | 0.01  | 0.01 | 6.28   | -0.07  | -    | -    | -    | -    | -    | -    |
|          | 60-100  | 0.21 | 2.70   | -0.00 | 0.01 | 6.58   | 0.08   | -    | -    | -    | -    | -    | -    |
|          | 100-200 | 0.15 | 3.94   | 0.14  | 0.01 | 7.02   | 0.12   | -    | -    | -    | -    | -    | -    |
| TK       | 0-5     | 0.25 | 0.56   | 0.00  | 0.01 | 0.67   | -0.07  | -    | -    | -    | -    | -    | -    |
|          | 5-15    | 0.26 | 0.55   | 0.00  | 0.01 | 0.67   | -0.07  | -    | -    | -    | -    | -    | -    |
|          | 15-30   | 0.27 | 0.55   | 0.00  | 0.00 | 0.66   | -0.05  | -    | -    | -    | -    | -    | -    |
|          | 30-60   | 0.25 | 0.57   | 0.00  | 0.00 | 0.67   | -0.04  | -    | -    | -    | -    | -    | -    |
|          | 60-100  | 0.22 | 0.61   | 0.00  | 0.00 | 0.71   | -0.06  | -    | -    | -    | -    | -    | -    |
|          | 100-200 | 0.16 | 0.50   | -0.00 | 0.00 | 2.12   | -0.08  | -    | -    | -    | -    | -    | -    |
| AK       | 0-5     | 0.27 | 110.72 | 1.22  | 0.03 | 181.65 | -24.17 | -    | -    | -    | -    | -    | -    |
|          | 5-15    | 0.24 | 102.74 | 1.27  | 0.02 | 168.75 | -23.75 | -    | -    | -    | -    | -    | -    |
|          | 15-30   | 0.24 | 83.50  | 1.10  | 0.02 | 150.73 | -20.54 | -    | -    | -    | -    | -    | -    |
|          | 30-60   | 0.21 | 76.76  | 0.98  | 0.01 | 140.83 | -17.93 | -    | -    | -    | -    | -    | -    |
|          | 60-100  | 0.16 | 79.33  | 1.46  | 0.01 | 142.55 | -20.97 | -    | -    | -    | -    | -    | -    |
|          | 100-200 | 0.12 | 70.70  | 0.61  | 0.00 | 182.79 | -42.54 | -    | -    | -    | -    | -    | -    |
| AP       | 0-5     | 0.14 | 9.58   | 0.26  | 0.09 | 11.86  | -3.37  | -    | -    | -    | -    | -    | -    |
|          | 5-15    | 0.13 | 8.84   | 0.23  | 0.07 | 11.03  | -3.21  | -    | -    | -    | -    | -    | -    |
|          | 15-30   | 0.12 | 6.77   | 0.19  | 0.07 | 8.57   | -2.18  | -    | -    | -    | -    | -    | -    |
|          | 30-60   | 0.10 | 5.81   | 0.08  | 0.09 | 7.74   | -1.84  | -    | -    | -    | -    | -    | -    |
|          | 60-100  | 0.12 | 6.20   | 0.08  | 0.06 | 9.04   | -1.93  | -    | -    | -    | -    | -    | -    |
|          | 100-200 | 0.12 | 6.16   | 0.07  | 0.00 | 20.47  | -5.64  | -    | -    | -    | -    | -    | -    |

"-" indicates that the soil property was not mapped or not included in the dataset.

**Table S5. Predictive performance of CSDLv2, SoilGrids 2.0, CSDLv2, and HWSD 2.0 based on validation with testing profiles from WoSIS. Refer to Table 1 for the abbreviations and units of the soil properties interested.**

| Property | Depth interval | CSDLv2 |       |       | CSDLv1 |       |       | SoilGrids 2.0 |       |       | HWSD 2.0 |       |        |
|----------|----------------|--------|-------|-------|--------|-------|-------|---------------|-------|-------|----------|-------|--------|
|          |                | MEC    | RMSE  | ME    | MEC    | RMSE  | ME    | MEC           | RMSE  | ME    | MEC      | RMSE  | ME     |
| pH       | 0-5            | 0.84   | 0.57  | 0.15  | 0.64   | 0.84  | 0.08  | 0.87          | 0.51  | 0.14  | 0.51     | 0.99  | -0.17  |
|          | 5-15           | 0.85   | 0.54  | 0.14  | 0.66   | 0.81  | 0.08  | 0.88          | 0.49  | 0.14  | 0.52     | 0.97  | -0.02  |
|          | 15-30          | 0.84   | 0.56  | 0.10  | 0.29   | 1.16  | -0.37 | 0.87          | 0.49  | 0.13  | 0.57     | 0.93  | -0.04  |
|          | 30-60          | 0.85   | 0.52  | 0.11  | 0.66   | 0.80  | 0.05  | 0.87          | 0.50  | 0.10  | 0.58     | 0.91  | -0.06  |
|          | 60-100         | 0.85   | 0.53  | 0.12  | 0.67   | 0.80  | 0.46  | 0.87          | 0.51  | 0.10  | 0.58     | 0.91  | -0.07  |
|          | 100-200        | 0.84   | 0.38  | -0.03 | 0.61   | 0.90  | 0.10  | 0.86          | 0.53  | 0.13  | 0.61     | 0.92  | 0.04   |
| sand     | 0-5            | 0.79   | 9.81  | -2.36 | 0.03   | 24.10 | -9.98 | 0.75          | 10.71 | -5.46 | 0.01     | 21.44 | -2.76  |
|          | 5-15           | 0.82   | 9.21  | -2.02 | 0.05   | 23.63 | -9.69 | 0.78          | 10.05 | -5.03 | 0.06     | 21.44 | -3.81  |
|          | 15-30          | 0.83   | 9.11  | -1.33 | 0.04   | 23.59 | -8.92 | 0.81          | 9.39  | -4.26 | 0.06     | 21.03 | -2.96  |
|          | 30-60          | 0.83   | 9.24  | -1.22 | 0.03   | 23.90 | -9.01 | 0.82          | 9.41  | -4.16 | 0.12     | 20.80 | -2.11  |
|          | 60-100         | 0.84   | 9.36  | -1.57 | 0.04   | 23.91 | -8.83 | 0.79          | 10.47 | -4.51 | 0.10     | 21.50 | -1.83  |
|          | 100-200        | 0.79   | 10.77 | -3.16 | 0.01   | 26.70 | -9.99 | 0.75          | 11.99 | -5.98 | 0.01     | 23.16 | -3.37  |
| silt     | 0-5            | 0.72   | 7.56  | 3.47  | 0.03   | 19.25 | 11.27 | 0.68          | 8.24  | 3.53  | 0.05     | 15.45 | 2.78   |
|          | 5-15           | 0.74   | 7.23  | 3.17  | 0.04   | 18.93 | 11.02 | 0.73          | 7.65  | 3.05  | 0.06     | 15.19 | 1.46   |
|          | 15-30          | 0.78   | 6.66  | 2.89  | 0.03   | 19.00 | 11.08 | 0.76          | 7.13  | 2.85  | 0.07     | 14.93 | 0.94   |
|          | 30-60          | 0.76   | 6.95  | 3.09  | 0.04   | 18.75 | 10.88 | 0.73          | 7.50  | 3.05  | 0.07     | 14.75 | 1.30   |
|          | 60-100         | 0.73   | 7.42  | 3.18  | 0.05   | 18.37 | 10.04 | 0.71          | 7.91  | 3.17  | 0.07     | 14.95 | 1.27   |
|          | 100-200        | 0.74   | 7.75  | 3.14  | 0.04   | 18.53 | 9.23  | 0.72          | 8.10  | 3.62  | 0.05     | 16.67 | 2.16   |
| clay     | 0-5            | 0.74   | 5.51  | 0.15  | 0.07   | 11.84 | -1.48 | 0.71          | 6.66  | 2.33  | 0.05     | 12.01 | 0.54   |
|          | 5-15           | 0.78   | 5.10  | 0.12  | 0.11   | 11.74 | -1.75 | 0.75          | 6.24  | 2.11  | 0.04     | 12.19 | 2.86   |
|          | 15-30          | 0.78   | 5.21  | -0.35 | 0.12   | 12.62 | -2.81 | 0.79          | 6.21  | 1.66  | 0.14     | 12.33 | 2.65   |
|          | 30-60          | 0.82   | 5.36  | -0.69 | 0.17   | 13.14 | -2.45 | 0.83          | 5.98  | 1.22  | 0.20     | 12.71 | 1.08   |
|          | 60-100         | 0.85   | 5.74  | -0.61 | 0.20   | 13.34 | -2.16 | 0.82          | 6.31  | 1.21  | 0.21     | 13.18 | 0.31   |
|          | 100-200        | 0.83   | 6.21  | 0.07  | 0.18   | 13.61 | 0.48  | 0.79          | 7.01  | 2.42  | 0.14     | 13.71 | 0.72   |
| OC       | 0-5            | 0.63   | 19.88 | 1.43  | 0.08   | 31.19 | -5.26 | 0.58          | 22.34 | 9.97  | 0.04     | 35.46 | -3.31  |
|          | 5-15           | 0.53   | 24.48 | 0.55  | 0.03   | 35.18 | -5.42 | 0.35          | 30.79 | -0.17 | 0.04     | 38.59 | -10.02 |
|          | 15-30          | 0.46   | 19.08 | 0.08  | 0.02   | 25.87 | -3.24 | 0.58          | 17.71 | 0.31  | 0.05     | 28.69 | -6.77  |
|          | 30-60          | 0.36   | 9.37  | 1.24  | 0.11   | 7.40  | -0.87 | 0.33          | 6.09  | 1.15  | 0.10     | 8.14  | -2.39  |
|          | 60-100         | 0.22   | 6.62  | 1.26  | 0.04   | 4.26  | -0.46 | 0.20          | 4.71  | 0.93  | 0.11     | 5.35  | -1.12  |
|          | 100-200        | 0.16   | 9.01  | 1.37  | 0.10   | 10.09 | -2.09 | 0.15          | 7.64  | 1.15  | 0.11     | 5.38  | -0.20  |
| CEC      | 0-5            | 0.23   | 7.03  | 4.85  | 0.09   | 9.28  | 4.86  | 0.24          | 6.08  | 5.12  | 0.07     | 10.30 | 3.25   |
|          | 5-15           | 0.25   | 5.80  | 3.98  | 0.07   | 9.20  | 3.21  | 0.22          | 6.10  | 4.56  | 0.05     | 11.22 | 4.37   |
|          | 15-30          | 0.25   | 5.89  | 4.16  | 0.07   | 9.19  | 3.02  | 0.23          | 5.89  | 5.22  | 0.04     | 11.56 | 4.82   |

|    |         |      |      |       |      |      |       |      |      |       |      |       |       |
|----|---------|------|------|-------|------|------|-------|------|------|-------|------|-------|-------|
|    | 30-60   | 0.28 | 5.34 | 4.05  | 0.12 | 8.10 | 2.51  | 0.25 | 5.92 | 5.11  | 0.07 | 9.89  | 2.89  |
|    | 60-100  | 0.25 | 5.62 | 4.13  | 0.09 | 9.25 | 4.82  | 0.21 | 6.01 | 4.72  | 0.06 | 11.02 | 3.22  |
|    | 100-200 | 0.24 | 6.42 | 4.72  | 0.06 | 9.32 | 4.20  | 0.22 | 6.13 | 4.89  | 0.03 | 12.68 | 4.93  |
| TN | 0-5     | 0.50 | 1.53 | -0.14 | 0.21 | 1.93 | -0.42 | 0.44 | 2.23 | 0.06  | 0.26 | 1.93  | -0.34 |
|    | 5-15    | 0.53 | 1.37 | -0.11 | 0.22 | 1.77 | -0.37 | 0.52 | 1.46 | -0.05 | 0.17 | 1.89  | -0.77 |
|    | 15-30   | 0.49 | 1.05 | -0.03 | 0.33 | 1.20 | -0.25 | 0.61 | 0.95 | 0.01  | 0.44 | 1.13  | -0.49 |
|    | 30-60   | 0.34 | 1.05 | 0.02  | 0.33 | 1.05 | -0.14 | 0.58 | 0.87 | 0.01  | 0.70 | 0.74  | -0.22 |
|    | 60-100  | 0.30 | 0.91 | 0.05  | 0.26 | 0.94 | -0.13 | 0.40 | 0.88 | 0.02  | 0.67 | 0.66  | -0.08 |
|    | 100-200 | 0.13 | 0.54 | 0.03  | 0.19 | 0.64 | -0.28 | 0.21 | 0.52 | 0.05  | 0.26 | 0.61  | -0.02 |
| BD | 0-5     | 0.68 | 0.14 | -0.01 | 0.20 | 0.28 | 0.05  | 0.63 | 0.14 | -0.01 | 0.26 | 0.34  | 0.15  |
|    | 5-15    | 0.73 | 0.13 | -0.01 | 0.12 | 0.27 | 0.04  | 0.67 | 0.12 | -0.00 | 0.21 | 0.32  | 0.17  |
|    | 15-30   | 0.70 | 0.13 | -0.02 | 0.01 | 0.24 | 0.08  | 0.72 | 0.10 | 0.02  | 0.23 | 0.32  | 0.16  |
|    | 30-60   | 0.57 | 0.15 | -0.02 | 0.01 | 0.22 | 0.04  | 0.55 | 0.16 | 0.02  | 0.15 | 0.29  | 0.15  |
|    | 60-100  | 0.56 | 0.14 | -0.05 | 0.02 | 0.20 | -0.01 | 0.55 | 0.15 | 0.01  | 0.05 | 0.26  | 0.09  |
|    | 100-200 | 0.61 | 0.11 | -0.04 | 0.11 | 0.19 | -0.02 | 0.59 | 0.11 | -0.01 | 0.11 | 0.23  | 0.05  |

**Table S6. Prediction interval coverage probability (PICP) for each soil property at multiple depths. Refer to Table 1 for the abbreviations and units of the soil properties interested.**

| property | Depth interval (cm) |      |       |       |        |         |
|----------|---------------------|------|-------|-------|--------|---------|
|          | 0-5                 | 5-15 | 15-30 | 30-60 | 60-100 | 100-200 |
| pH       | 0.90                | 0.91 | 0.91  | 0.91  | 0.91   | 0.91    |
| sand     | 0.90                | 0.90 | 0.90  | 0.90  | 0.90   | 0.91    |
| silt     | 0.91                | 0.90 | 0.90  | 0.90  | 0.90   | 0.90    |
| clay     | 0.90                | 0.90 | 0.90  | 0.90  | 0.90   | 0.90    |
| BD       | 0.90                | 0.90 | 0.91  | 0.89  | 0.89   | 0.89    |
| OC       | 0.90                | 0.90 | 0.90  | 0.90  | 0.90   | 0.90    |
| Gravel   | 0.91                | 0.90 | 0.90  | 0.89  | 0.90   | 0.90    |
| AN       | 0.90                | 0.90 | 0.91  | 0.90  | 0.90   | 0.90    |
| TN       | 0.90                | 0.91 | 0.90  | 0.90  | 0.90   | 0.90    |
| CEC      | 0.90                | 0.90 | 0.90  | 0.90  | 0.90   | 0.89    |
| Porosity | 0.90                | 0.89 | 0.90  | 0.90  | 0.90   | 0.88    |
| TK       | 0.90                | 0.90 | 0.90  | 0.90  | 0.90   | 0.90    |
| TP       | 0.90                | 0.91 | 0.90  | 0.90  | 0.90   | 0.90    |
| AK       | 0.90                | 0.90 | 0.90  | 0.90  | 0.90   | 0.90    |
| AP       | 0.90                | 0.88 | 0.90  | 0.91  | 0.90   | 0.90    |
| R(wet)   | 0.90                | 0.89 | 0.90  | 0.90  | 0.90   | 0.92    |
| G(wet)   | 0.90                | 0.90 | 0.90  | 0.91  | 0.90   | 0.90    |
| B(wet)   | 0.90                | 0.90 | 0.90  | 0.90  | 0.91   | 0.90    |
| R(dry)   | 0.90                | 0.90 | 0.89  | 0.90  | 0.90   | 0.90    |
| G(dry)   | 0.90                | 0.90 | 0.89  | 0.90  | 0.92   | 0.90    |
| B(dry)   | 0.90                | 0.90 | 0.90  | 0.91  | 0.90   | 0.90    |
